# Supplementary material for: A Genomic Survey of SCPP Family Genes in Fishes Provides Novel Insights into the Evolution of Fish Scales
Source: MDPI journal article supplement (doi:10.3390/ijms18112432), 2017-11-16
Supplement: s1 [file s1]

|              |       |       |           |       |                              |                                        |                                       |                                       |       |       |       |    |       |       |    |    |    |
|--------------|-------|-------|-----------|-------|------------------------------|----------------------------------------|---------------------------------------|---------------------------------------|-------|-------|-------|----|-------|-------|----|----|----|
|              | 5     | 10    | 15        | 20    | 25                           | 30                                     | 35                                    | 40                                    | 45    | 50    | 55    | 60 | 65    | 70    | 75 | 80 |    |
| conservation | ***** | ***** |           | ***** | *****                        | *****                                  | *****                                 | *****                                 | ***** | ***** | ***** |    | ***** | ***** |    |    |    |
| SCPP1`CI     | ATGAA | A     | CCTGT     | CAT   | CC                           | TGATTCTCTGTCTGCTGGGAGCAGCCT            | A                                     | TGCTAATCCAATCTTGCATAAAATGGCTATGGAGAT  |       |       |       |    |       |       |    |    | 80 |
| SCPP1`AM     |       |       |           |       |                              |                                        |                                       |                                       |       |       |       |    |       |       |    |    | 0  |
| SCPP1`DR     | ATGAA | AGT   | CTGCC     | CTAT  | TGATTCTTTGTCTGT              | TGGGAGCAGCCT                           | G                                     | TGCTAATCCAATCTTGCATAAAAGTGGCTATGGAGAT |       |       |       |    |       |       |    |    | 80 |
| SCPP1`IP     | ATGAA | AG    | CTGGCTTT  | CG    | TGATTCTCTGCCTGCTCGGAGCTGCCGG | TGCAAATCCAATTTTGCAC                    | .....                                 | ACGGATAT                              |       |       |       |    |       |       |    |    | 71 |
| SCPP1`LW     | ATGAA | A     | CCTGCCAT  | ACT   | TGATTCTATGTCTGCTGGGAACAGCCT  | ATGCTAATCCAATCTTGCATAAAATGGCTATGGAGAT  |                                       |                                       |       |       |       |    |       |       |    |    | 80 |
| SCPP1`PN     | ATGAA | AGTTT | TGCCAT    | TG    | TAATTCTCTGCCTGCTGGGAACAACCAG | TGCTAATCCCATCTTATACAAAGTGACCACTGAGAT   |                                       |                                       |       |       |       |    |       |       |    |    | 80 |
| SCPP1`PP     | ATGAA | A     | CCTGCCAT  | ACT   | TGATTCTATGTCTGCTGGGAGCAGCCT  | ACGCTAATCCAATCTTGCATAAAATGGCTATGGAGAT  |                                       |                                       |       |       |       |    |       |       |    |    | 80 |
| SCPP1-C1`CC  | ATGAA | A     | CCTGCCAT  | GT    | TGATTCTCTGTCTGCTGGGAGCAGCCT  | ATGCTAATCCAATCTTGCATAAAATGGCTATGGAGAT  |                                       |                                       |       |       |       |    |       |       |    |    | 80 |
| SCPP1-C2`CC  | ATGAA | A     | CATGCCAT  | AT    | TGATTCTCTGTCTGCTGGGAGCAGCCT  | ATGCTAATCCAATCTTGCATAAAACGGCTATGGAGAT  |                                       |                                       |       |       |       |    |       |       |    |    | 80 |
| SCPP1-C1`SR  |       |       |           |       |                              |                                        |                                       |                                       |       |       |       |    |       |       |    |    | 0  |
| SCPP1-C2`SR  | ATGAA | A     | CCTGCCAT  | AT    | TGATTCTCTGTCTGCTGGGAGCAGCCT  | ATGCTAATCCAATCTTGCATAAAAAAGACTATGGAGAT |                                       |                                       |       |       |       |    |       |       |    |    | 80 |
| SCPP1-C1`SA  | ATGA  | A     | CCCTGCCAT | AT    | TGATTCTCTGTCTGCTGGGAGCAGCCT  | ATGCTAATCCAATCTTGCATAAAAAAGCTATGGAGGT  |                                       |                                       |       |       |       |    |       |       |    |    | 80 |
| SCPP1-C2`SA  | ATGAA | A     | CCCTGCCAT | ACT   | TGATTCTCTGTCTGCTGGGAGCAGCCT  | ATGCTAATCCAATCTTGCATAAAAAAGACTATGGAGAT |                                       |                                       |       |       |       |    |       |       |    |    | 80 |
| SCPP1-C1`SG  | ATGAA | A     | CCTGCCAT  | AT    | TGATTCTCTGTCTGCTGGGAGCAGCCT  | ATGCTAATCCAATCTTGCATAAAAAAGCTATGGAGGT  |                                       |                                       |       |       |       |    |       |       |    |    | 80 |
| SCPP1-C2`SG  | ATGAA | A     | CCTGCCAT  | AT    | TGATTCTCTGTCTGCTGGGAGCAGCCT  | G                                      | TGCTAATCCAATCTTGCATAAAAAAGACTATGGAGAT |                                       |       |       |       |    |       |       |    |    | 80 |

|              |                   |             |                        |             |                    |                       |                        |          |       |       |       |       |       |       |       |       |     |
|--------------|-------------------|-------------|------------------------|-------------|--------------------|-----------------------|------------------------|----------|-------|-------|-------|-------|-------|-------|-------|-------|-----|
|              | 85                | 90          | 95                     | 100         | 105                | 110                   | 115                    | 120      | 125   | 130   | 135   | 140   | 145   | 150   | 155   | 160   |     |
| conservation | *****             | *****       | *****                  | *****       | *****              | *****                 | *****                  | *****    | ***** | ***** | ***** | ***** | ***** | ***** | ***** | ***** |     |
| SCPP1`CI     | GATTCAACATGCATCCA | ACTCTT      | CAGAAAGCTCTTCAAT       | A           | TCTGAATCCTC        | C                     | GACCAGAGTAACACCTCAGA   | ACCTTCAG |       |       |       |       |       |       |       |       | 160 |
| SCPP1`AM     |                   |             |                        |             |                    |                       |                        |          |       |       |       |       |       |       |       |       | 0   |
| SCPP1`DR     | GATTCAACATGCATCT  | AACTCTTCG   | AAAAGCTCCTCAAT         | A           | TCTGAATCCTC        | AGACCAGAGTAATACCTCAGA | ACCTTCGG               |          |       |       |       |       |       |       |       |       | 160 |
| SCPP1`IP     | GATGG             | AGACCGCATCG | AACTCTTCAGAGCCTCCTCGAT | G           | TCTGCATCTACTGAAGAA | .....                 | ACCGTTGCCATAGACC       |          |       |       |       |       |       |       |       |       | 145 |
| SCPP1`LW     | GATTCAACATGCATCCA | ACTCTTCG    | AAAAGCTCTTCAAT         | A           | TCTGAATCCTC        | CGACCAGAGTAATACCTCAGA | ACCTTCAG               |          |       |       |       |       |       |       |       |       | 160 |
| SCPP1`PN     | GATGGAACATGCATCCA | ACTCT       | .....                  | ACCTCATCAGT | G                  | TCTGAATCCTC           | TGAAGAAAGCGATACATCAGAA | .....    | C     |       |       |       |       |       |       |       | 148 |
| SCPP1`PP     | GATTCAACATGCATCCA | ACTCTTCG    | AAAAGCTCTTCAAT         | A           | TCTGAATCCTC        | CGACCAGAGTAATACCTCAGA | ACCTTCAG               |          |       |       |       |       |       |       |       |       | 160 |
| SCPP1-C1`CC  | GATTCAACATGCATCCA | ACTCTTCG    | GAGAGCTCTTCAAT         | A           | TCTGAATCCTC        | TGACCAGAGTAATACCTCAGA | ACCTTCAG               |          |       |       |       |       |       |       |       |       | 160 |
| SCPP1-C2`CC  | TATTCAACATGCATCCA | ACTCTTCG    | AAAAGCTCTTCGAT         | G           | TCTGAATCTTC        | CGACCAGAGTAATACCTCAGA | ACCTTCAG               |          |       |       |       |       |       |       |       |       | 160 |
| SCPP1-C1`SR  |                   |             |                        |             |                    |                       |                        |          |       |       |       |       |       |       |       |       | 22  |
| SCPP1-C2`SR  | GATTCAACATGCATCCA | ACTCTTCG    | AAAAGCTCTTCAAT         | G           | TCTGAATCCTC        | CGACCAGAGTAATACCTCAGA | ACCTTCAG               |          |       |       |       |       |       |       |       |       | 160 |
| SCPP1-C1`SA  | GATTCAACATGCATCCA | ACTCTTCG    | AAAAGCTCTTCAAT         | A           | TCTGAATCCTC        | CGACCAGAGTAATATCTCAGA | ACCTTCAG               |          |       |       |       |       |       |       |       |       | 160 |
| SCPP1-C2`SA  | GATTCAACATGCATCCA | ACTCTTCG    | AAAAGCTCTTCAAT         | G           | TCTGAATCCTC        | CGACCAGAGTAATACCTCAGA | ACCTTCAG               |          |       |       |       |       |       |       |       |       | 160 |
| SCPP1-C1`SG  | GATTCAACATGCATCCA | ACTCTTCG    | AAAAGCTCTTCAAT         | A           | TCTGAATCCTC        | CGACCAGAGTAATACCTCAGA | ACCTTCAG               |          |       |       |       |       |       |       |       |       | 160 |
| SCPP1-C2`SG  | GATTCAACATGCATCCA | AGCTCTTCG   | AAAAGCTCTTCAAT         | G           | TCTGAATCCTC        | CGACCAGAGTAATACCTCAGA | ACCTTCAG               |          |       |       |       |       |       |       |       |       | 160 |

|              |             |             |            |                    |                                |                                |                       |                               |             |       |       |       |       |       |     |     |
|--------------|-------------|-------------|------------|--------------------|--------------------------------|--------------------------------|-----------------------|-------------------------------|-------------|-------|-------|-------|-------|-------|-----|-----|
|              | 165         | 170         | 175        | 180                | 185                            | 190                            | 195                   | 200                           | 205         | 210   | 215   | 220   | 225   | 230   | 235 |     |
| conservation | *           | *****       | *          | *****              | *****                          | *****                          | *****                 | *****                         | *****       | ***** | ***** | ***** | ***** | ***** | *   |     |
| SCPP1`CI     | AAGAGAAGT   | CC          | AAGGAAAA   | ATG                | CCTC                           | CGACAGCAGTAG                   | C                     | TCAGAATCGCTTGAATCTGACTCAGATGA | ACCGGATCTCT | ...   |       |       |       |       |     | 237 |
| SCPP1`AM     |             |             |            |                    |                                |                                |                       |                               |             |       |       |       |       |       |     | 0   |
| SCPP1`DR     | AAGAGAAGT   | CAG         | AGGAAAA    | TGTT               | TCCGACAGCAATAG                 | CTCTGAATCACTTGAATCTGAATCAGATGA | ACCGGATATCT           | AAAA                          |             |       |       |       |       |       |     | 240 |
| SCPP1`IP     | AAGATAG     | CTCTCAGG    | AAAAATACTT | CAGAGGACACC        | ACCTCAGAATCCATGGAATCGAATT      | CATCTGAGAAGACCTTGGAA           |                       |                               |             |       |       |       |       |       |     | 225 |
| SCPP1`LW     | AAGAGAAGT   | CC          | AAGGAAAA   | TGT                | CTCAGACAGCAATAG                | CTCAGAATCGCTTGAATCTGACTCGGATGA | AAACGATCTCT           | AAAA                          |             |       |       |       |       |       |     | 240 |
| SCPP1`PN     | ACAAC       | AGCTC       | ACCGGAAAA  | TACT               | TCTGAGAA                       | CAATACGTCAGAATCGCTG            | GAGTCTGCATCCGATGATCAG | ACTTCAGAC                     |             |       |       |       |       |       |     | 228 |
| SCPP1`PP     | AAGAGGTAAGC |             |            |                    |                                |                                |                       |                               |             |       |       |       |       |       |     | 171 |
| SCPP1-C1`CC  | ATGAGAAAT   | CTAAGG      | AAAC       | TGTCTCCGACAGCAGCAG | CTCAGAATCAACTGAATCAGACTCTAATGA | ACCGGATCTCA                    | ...                   |                               |             |       |       |       |       |       |     | 237 |
| SCPP1-C2`CC  | AAGAGAAGT   | CTACGG      | AAAC       | TGTCTCTGACAGCAATAG | TTTCAGAATCAATGAATCGGCTCAAATGA  | ACCGGATTTCT                    | ...                   |                               |             |       |       |       |       |       |     | 237 |
| SCPP1-C1`SR  | AGACT       | TAAGTCTAAGG | AAAC       | TGTCTCCGACAGCAATAG | CTCAGAATCAACTGAATCAGACTCTAATGA | ACCGGATCTCT                    | ...                   |                               |             |       |       |       |       |       |     | 99  |
| SCPP1-C2`SR  | AAGGAA      | ACTCTAAGG   | AAAC       | TGTCTCCGACAGCAATAG | TTTCAGAATCAATGAATCGGACTCAAATGA | ACCGGATTTCA                    | ...                   |                               |             |       |       |       |       |       |     | 237 |
| SCPP1-C1`SA  | ATGAGAAGT   | CTAAGG      | AAAC       | TGTCTCCGACAGCAATAG | TCAGAATCAACTGAATCAGACTCTAATGA  | ACCGGATCTCT                    | ...                   |                               |             |       |       |       |       |       |     | 237 |
| SCPP1-C2`SA  | AAGAGAAGT   | CTAAGG      | AAAC       | TGTCTCCGACAGCAATAG | TTTCAGAATCAATGAATATGACTCAAATGA | ACCGGATTTCA                    | ...                   |                               |             |       |       |       |       |       |     | 237 |
| SCPP1-C1`SG  | ATGAGAAGT   | CTAAGG      | AAAC       | TGTCTCCGACAGCAATAG | CTCAGAATCAACTGAATCAGACTCTAATGA | ACCGGATCTCT                    | ...                   |                               |             |       |       |       |       |       |     | 237 |
| SCPP1-C2`SG  | AAGAGAAGT   | CTAAGG      | AAAC       | TGTCTCAGAGAGCAGTAG | TTTCAGAATCAATGAATCAGACTCAAATGA | ACCGGATTTCA                    | ...                   |                               |             |       |       |       |       |       |     | 237 |

|              |     |                    |                   |                               |                                               |                        |       |       |       |       |       |       |       |       |       |     |
|--------------|-----|--------------------|-------------------|-------------------------------|-----------------------------------------------|------------------------|-------|-------|-------|-------|-------|-------|-------|-------|-------|-----|
|              | 240 | 245                | 250               | 255                           | 260                                           | 265                    | 270   | 275   | 280   | 285   | 290   | 295   | 300   | 305   | 310   |     |
| conservation | **  | *****              | *****             | *****                         | *****                                         | *****                  | ***** | ***** | ***** | ***** | ***** | ***** | ***** | ***** | ***** |     |
| SCPP1`CI     | ... | AGC                | GAAAGCCATTCTGTG   | GAAAGACTGATTGG                | AAAAAGCGACACTTCACTGACATCAGATA                 | AACACTCAAAGCAGTAA      |       |       |       |       |       |       |       |       |       | 314 |
| SCPP1`AM     |     |                    |                   |                               |                                               |                        |       |       |       |       |       |       |       |       |       | 71  |
| SCPP1`DR     |     |                    |                   |                               |                                               |                        |       |       |       |       |       |       |       |       |       |     |
| SCPP1`IP     | GAG | AGT                | GAAAGCCATTCTGTG   | GAAAGTCTGATTGG                | AAAAAGCGAGACCGCACTGACAGCCGACAACACTCAAAGCAGTAA |                        |       |       |       |       |       |       |       |       |       | 320 |
| SCPP1`LW     | ACA | AGCCAAAGCAACT      | CGCTGGAAGAA       | CGGTTTGGCAATGG                | AGAGGCTGGAATGACCGT                            | CGATAACAGCCAAAGGAAGCAC |       |       |       |       |       |       |       |       |       | 305 |
| SCPP1`PN     | GAG | AGCGAAAGCCATTCTGTG | GAAAAATTTGATTGG   | AAAAAGCGAGGCTGCACTGACATCGGATA | AACACTCAAAGCAGTAA                             |                        |       |       |       |       |       |       |       |       |       | 320 |
| SCPP1`PP     | ATG | AGCCGG             | AGTCACTCCCTGGAAG  | CTCGGTTTGGCACAGG              | TGAGACAGGAATGACCACAGATGACAGCC                 | AAGGCAGCCT             |       |       |       |       |       |       |       |       |       | 308 |
| SCPP1-C1`CC  |     |                    |                   |                               |                                               |                        |       |       |       |       |       |       |       |       |       | 171 |
| SCPP1-C2`CC  | ... | AGT                | GAAAGCCATTCTGTG   | GAAAGTCTGATTGG                | AAAAAGTGAGACTGCACTGACATCAGATA                 | AACACTCAAAGCAGTAA      |       |       |       |       |       |       |       |       |       | 314 |
| SCPP1-C1`SR  | ... | AGT                | GAAAGCCATTCTAGTGG | AAAGTCTGTCTGG                 | AAAAAGCGAGACTGCACTGACATCAGACA                 | AACACTCAAAGCAGTAA      |       |       |       |       |       |       |       |       |       | 314 |
| SCPP1-C2`SR  | ... | AGT                | GAAAGCCATTCTGTG   | GAAAGTCTGACTGG                | AAAAAGCGAGACTGCACTGACATCAGATA                 | AACACTCAAAGCAGTAA      |       |       |       |       |       |       |       |       |       | 176 |
| SCPP1-C1`SA  | ... | AGT                | GAAAGCCATTCTGTG   | GAAAGTCTGATTGG                | AAAAAGTGAGACTGCACTGACATCAGATA                 | AACACTCAAAGCAGTAA      |       |       |       |       |       |       |       |       |       | 314 |
| SCPP1-C2`SA  | ... | AGT                | GAAAGCCATTCTGT    | CGAAAGTCTGACTGG               | AAAAAGCGAGACTGCACTGACATCAGATA                 | AACACTCAAAGCAGTAA      |       |       |       |       |       |       |       |       |       | 314 |
| SCPP1-C1`SG  | ... | AGT                | GAAAGCCATTCTGTG   | GAAAGTCTGATTGG                | AAAAAGTGAGACTGCACTTACATCAGATA                 | AACACTCAAAGCAGTAA      |       |       |       |       |       |       |       |       |       | 314 |
| SCPP1-C2`SG  | ... | AGT                | GAAAGCCATTCTGTG   | GAAAGTCTGACTGG                | AAAAAGCGAGACTGCACTGACATCAGATA                 | AACACTCAAAGCAGTAA      |       |       |       |       |       |       |       |       |       | 314 |

|              |         |       |                  |          |              |                       |       |        |              |                              |           |         |       |     |     |       |
|--------------|---------|-------|------------------|----------|--------------|-----------------------|-------|--------|--------------|------------------------------|-----------|---------|-------|-----|-----|-------|
|              | 315     | 320   | 325              | 330      | 335          | 340                   | 345   | 350    |              | 355                          | 360       | 365     | 370   | 375 | 380 |       |
| conservation | *****   | *     | *                | *****    | *****        | *****                 | ***** | *****  |              | *****                        | *****     | *       | ***** | *   | *   | ***** |
| SCPP1`CI     | AGAGAAC | CGTT  | CGTAGGGGCTGGAT   | C        | TACACCCTCAAA | .....                 |       |        |              | TGGGTCCATATGAACAATGGTGG      | C         | AAAGTGC |       |     |     | 382   |
| SCPP1`AM     | GGAGAAC | ATGCG | CAAGAACTGGGTT    | CATCTCAT | CAAC         | .....                 |       |        |              | GTCAAAATGGCCAGTAAAGAGG       | ACACGGAGG |         |       |     |     | 139   |
| SCPP1`DR     | AGAGAAC | AT    | CGTAGGGGCTGGAT   | C        | TACACCCTCAAA | .....                 |       |        |              | TGGGTCCCAACCAACAACAAC        | ...       | ATTGTGC |       |     |     | 385   |
| SCPP1`IP     | AGAGAT  | CA    | TGCGCAAGAGCCAGAG | AAAAA    | ACTCCAAG     | .....                 |       |        |              | AGCATCAGCAGCAGTAGTGAGAGCAGTG |           |         |       |     |     | 370   |
| SCPP1`LW     | AGAGAAT | GT    | CGTAGGGGCTGGAT   | C        | TACACCCTCAAA | .....                 |       |        |              | TGGGTCCATACGAATAACAGCGG      | C         | AAAGTGC |       |     |     | 388   |
| SCPP1`PN     | GGAGAAC | AT    | GCGCAAGCT        | CCACCCAT | T            | CATACTGAGGTTCTAATGAAG | C     | TGGATT | CATCTCATCAAC | CGTCAAAGTGTCTCA              |           |         |       |     |     | 388   |
| SCPP1`PP     |         |       |                  |          |              |                       |       |        |              |                              |           |         |       |     |     | 171   |
| SCPP1-C1`CC  | CGAGAAC | CGTT  | CGTAAGGGGCTGGAT  | C        | TACACCCTCAAA | .....                 |       |        |              | TGGGTTTCATAAGAACAACAATGCC    | ATTGTGC   |         |       |     |     | 382   |
| SCPP1-C2`CC  | AGAGAAT | GT    | CGTAGGGGCTGGAT   | C        | TACACCCTCAAA | .....                 |       |        |              | TGGGTCCATATTAACAACAACGG      | C         | AAAGTGC |       |     |     | 382   |
| SCPP1-C1`SR  | AGAGAAC | CGTT  | CGTAGGGGCTGGAT   | T        | TACACCCTCAAA | .....                 |       |        |              | TGGGTCCATAGAACAACAATTC       | CATTGTGC  |         |       |     |     | 244   |
| SCPP1-C2`SR  | AGAGAAT | GT    | CGTAGGGGCTGGAT   | C        | TACACCCTCAAA | .....                 |       |        |              | TGGGTCCATATTAACAACAACGG      | C         | AAAGTGC |       |     |     | 382   |
| SCPP1-C1`SA  | AGAGAAC | CGTT  | CGTAGGGGCTGGAT   | T        | TACACCCTCAAA | .....                 |       |        |              | TGGGTCCATAAGAACAACAATGC      | CATTGTGC  |         |       |     |     | 382   |
| SCPP1-C2`SA  | AGAGAAT | GT    | CGTAGGGGCTGGAT   | C        | TACACCCTCAAA | .....                 |       |        |              | TGGGTCCATATTAACAACAACGG      | C         | AAAGTGC |       |     |     | 382   |
| SCPP1-C1`SG  | AGAGAAC | CGTT  | CGTAGGGGCTGGAT   | T        | TACACCCTCAAA | .....                 |       |        |              | TGGGTCCATAAGAACAACAATGCC     | ATTGTGC   |         |       |     |     | 382   |
| SCPP1-C2`SG  | AGAGAAT | GT    | CGTAGGGGCTGGAT   | C        | TACACCCTCAAA | .....                 |       |        |              | TGGGTCCATATTAACAACAACGG      | C         | AAAGTGC |       |     |     | 382   |

|              | 385                                  | 390                              | 395                | 400                | 405             | 410   | 415   | 420   | 425   | 430   | 435   | 440   | 445   | 450   | 455   | 460   |     |
|--------------|--------------------------------------|----------------------------------|--------------------|--------------------|-----------------|-------|-------|-------|-------|-------|-------|-------|-------|-------|-------|-------|-----|
| conservation | *****                                | *****                            | *****              | *****              | *****           | ***** | *     | ***** | **    | *     | *     | *     | **    | ***** | ***** | *     |     |
| SCPP1'C1     | AAGCGACCAGCCAGCCAGACGAGAATTACATCAAA  | TCCACCAGTGATGCATCAA              | AAAAAAGT           | GAAAGCAGTGAATC     | GAGT            |       |       |       |       |       |       |       |       |       |       |       | 462 |
| SCPP1'AM     | AAGTGACCAGCCAACAGACGAGGAGGACAAGA     | CACGACAGAGGAC                    | .....              | CAGACTCCGAGAGC     | AGC             |       |       |       |       |       |       |       |       |       |       |       | 204 |
| SCPP1'DR     | AACCAACCGGCCAGCCCATGAAATGACATCCAG    | TCCACTAGTGACGCATCCC              | AAATAAGT           | GAGAGCAGCAATCAAGC  |                 |       |       |       |       |       |       |       |       |       |       |       | 465 |
| SCPP1'IP     | AGTCTACTGAGGGTCAAGGCAACAATTCAACA     | AGCAGCAGCAGCAGCGAGAGCAGTGAAGCAGC | GAAAGCAGTGAGAGCAGC |                    |                 |       |       |       |       |       |       |       |       |       |       |       | 450 |
| SCPP1'LW     | AAGCGACCAGCCAGCCGGAC                 | .....                            | .....              | .....              | .....           | ..... | ..... | ..... | ..... | ..... | ..... | ..... | ..... | ..... | ..... | ..... | 438 |
| SCPP1'PN     | GCGAGGAGGACA                         | AAGACACGACAGAGGACCTCTCC          | TCTAAC             | .....              | .....           | ..... | ..... | ..... | ..... | ..... | ..... | ..... | ..... | ..... | ..... | ..... | 444 |
| SCPP1'PP     | .....                                | .....                            | .....              | .....              | .....           | ..... | ..... | ..... | ..... | ..... | ..... | ..... | ..... | ..... | ..... | ..... | 171 |
| SCPP1-C1'CC  | AAGCGACCAGCCAGCCAGACGAGAATGACATCAAA  | TCCACTAGTGACGCATCAA              | AAAAAAGT           | GAAAGCAGTGTTTCAAGT |                 |       |       |       |       |       |       |       |       |       |       |       | 462 |
| SCPP1-C2'CC  | AAGCGACCAGCCAGCCAGATGAGAATGACATCAAG  | TCCACTAGTGATGCGTCAA              | AAAAAAGT           | GAAAGCAGTGAATCAAGT |                 |       |       |       |       |       |       |       |       |       |       |       | 462 |
| SCPP1-C1'SR  | AAGCGACCAGCCAGCCAGAAAGAGAATGACATAAA  | TCCACTAGTGACGAATCAA              | AAAAAAGT           | GAAAGCAGTGAATCAAGT |                 |       |       |       |       |       |       |       |       |       |       |       | 324 |
| SCPP1-C2'SR  | AAGCGACCAGCCAGCCAGAAAGAGAATGACATCAA  | TCCACTAGTGACGCGTCAA              | AAAAAAGT           | GAAAGCAGTGAATCAAGT |                 |       |       |       |       |       |       |       |       |       |       |       | 462 |
| SCPP1-C1'SA  | AAGCGACCAGCCAGCCAGAAAGAGAATGACATCAA  | TCCACTAGTGACGAATCAA              | AAAAAAGT           | GAAAGCAGTGAATCAAGT |                 |       |       |       |       |       |       |       |       |       |       |       | 462 |
| SCPP1-C2'SA  | AAGCGACCAGCCAGCCAGAAAGAGAATGACATCAA  | TCCACTAGTGACGCATCAA              | AAAAA              | .....              | AGCAGTGAATCAAGT |       |       |       |       |       |       |       |       |       |       |       | 456 |
| SCPP1-C1'SG  | AAGCGACCAAGCCAGCCAGAAAGAGAATGACATCAA | TCCACTAGT                        | .....              | .....              | .....           | ..... | ..... | ..... | ..... | ..... | ..... | ..... | ..... | ..... | ..... | ..... | 444 |
| SCPP1-C2'SG  | AAGTGACCAGCCAGCCAGAAAGAGAATGAC       | .....                            | .....              | .....              | .....           | ..... | ..... | ..... | ..... | ..... | ..... | ..... | ..... | ..... | ..... | ..... | 411 |

conservation

|             | 465     | 470     | 475        | 480        | 485     | 490        | 495             | 500        | 505     | 510    | 515        | 520     | 525    | 530   | 535   | 540 |     |
|-------------|---------|---------|------------|------------|---------|------------|-----------------|------------|---------|--------|------------|---------|--------|-------|-------|-----|-----|
| SCPP1'C1    | GAAAGCC | CAGGAAA | CGTTGTTCT  | GAA        | CACAAAG | GAA        | GAGGATAACAGT    | GCC        | GACAC   | GAGT   | GAAAGCACT  | GAA     | CACAGT | ..    |       |     | 540 |
| SCPP1'AM    | GAGTCC  | CACGGAG | AGCCCACCC  | CCG        | CAGCAG  | CAGCAGCAGC | AGCAGC          | GACAGC     | AGT     | .....  | AGGGCGGT   |         |        |       |       |     | 269 |
| SCPP1'DR    | GAAAGCC | CAGGAAA | AGTTTGT    | CGT        | GAA     | CAAGAT     | GCAAGT          | GGATAACAGT | GAC     | GACAC  | AGT        | GAAAGCG | GCT    | GAA   | CAAA  | TGG | 545 |
| SCPP1'IP    | GAGTCC  | ACTGAAA | ACCCGG     | GAGAAG     | AACT    | CAA        | CAGCAGCAGC      | AACAG      | CAGCAGT | GAG    | AGCAA      | AGCGT   | CAG    | AACAG | ATC   |     | 530 |
| SCPP1'LW    | GAAAGCC | CAGGAAA | CAGTTGTTCT | GAG        | CACAAAG | GAAG       | AGATAACGGT      | GCC        | GACACA  | AGT    | GAAAGC     | .....   |        |       |       |     | 504 |
| SCPP1'PN    | GAGAGTC | AGGAGCA | GCAAACCC   | CAC        | AG      | CAGCAG     | CAGCAGCAGC      | AGCAG      | CACACA  | GAGTCC | AGC        | ..      | AGCAA  | AG    | AGCAG | GGC | 521 |
| SCPP1'PP    |         |         |            |            |         |            |                 |            |         |        |            |         |        |       |       |     | 171 |
| SCPP1-C1'CC | GAAAGCC | CAGGAAA | TGGCTGTTCT | AAA        | CACAAAG | CAAG       | GAGGATAACAGT    | TGG        | GACACA  | AGT    | GAAAGCACT  | GAAAA   | CAGTTA |       |       |     | 542 |
| SCPP1-C2'CC | GAAAGCA | AAGGAAA | CAGTTGTTCT | GAA        | CACCAAG | GAG        | GAGGATAACAGT    | GCC        | GATACA  | AGT    | GAAAGCACT  | GAAAA   | CAGTTA |       |       |     | 542 |
| SCPP1-C1'SR | GAAAGCC | CAGGAAA | TGGTTGTTCT | AAG        | CACAAAG | GAAG       | GAGGATAAGAGT    | GCG        | GACATA  | AGT    | GAAAGCACT  | GAAAA   | CAGTTA |       |       |     | 404 |
| SCPP1-C2'SR | GAAAGCA | AAGGAAA | TGGTTGTTCT | GAA        | CACAAAA | AGG        | GAGGATAACAGT    | GCC        | GACACA  | AGT    | GAAAGCACT  | GAAAA   | CAGTTA |       |       |     | 542 |
| SCPP1-C1'SA | GAAAGCC | CAGGAAA | TGGTTGTTCT | AAG        | CACAAAG | GAAG       | GAGGATAAGAGT    | TGG        | GACACA  | AGT    | GAAAGCACT  | GAAAA   | CAGTTA |       |       |     | 542 |
| SCPP1-C2'SA | GAAAGCA | AAGGAAA | TGGTTGTTCT | GAA        | CACAAAG | GAG        | GAGGATAACAGT    | GCG        | GACACA  | AGT    | GAAAGCACT  | GAAAA   | CAGTTA |       |       |     | 536 |
| SCPP1-C1'SG | GAAAGCC | AGGAAA  | TGGTTGTTCT | AAG        | CACAAAG | GAAG       | GAGGATAAGAGT    | GCG        | GACACA  | AGT    | GAAAGCACT  | GAAAA   | CAGTTA |       |       |     | 524 |
| SCPP1-C2'SG | ..      | AGCAA   | AAGGAAA    | TGGTTGTTCT | GAA     | CACAAAG    | GAGGAGGATAACAGT | GCC        | GACACA  | AA     | TGAAAGCACT | GAAAA   | CAGTTA |       |       |     | 488 |

|              |        |        |         |         |         |          |             |                    |                    |                 |              |           |          |     |     |     |
|--------------|--------|--------|---------|---------|---------|----------|-------------|--------------------|--------------------|-----------------|--------------|-----------|----------|-----|-----|-----|
|              |        | 545    | 550     | 555     | 560     | 565      | 570         |                    | 575                | 580             | 585          | 590       | 595      | 600 | 605 |     |
| conservation | *      | *      | *       | *       | *       | *        | *           | *                  | *                  | *               | *            | *         | *        | *   | *   | *   |
| SCPP1'C1     | ...    | GTTGA  | AGGTACT | GAGTAT  | AA      | TAC      | GAGCAAC     | .....              | AGCAGCAGCAGCAGCAGT | AGCAGT          | GAAAGCAC     | CGAGT     |          |     |     | 607 |
| SCPP1'AM     | GGTG   | GTTGAC | AGCTCT  | GAGAAC  | CCAC    | AGCAAC   | .....       | AGCAGCAGCAGCAGCAGT | AGCAGC             | CGAGAGCC        | ACCGAGT      |           |          |     |     | 337 |
| SCPP1'DR     | TGTT   | GTT    | ...     | GCTACT  | GAAT    | CACAGA   | AC          | AGTAAC             | .....              | AGCAGCAGCAGCAGT | AGCAGCAGT    | GAAAGCAC  | CGAGT    |     |     | 613 |
| SCPP1'IP     | AACGAT | CGAC   | AGCGAT  | GAGAA   | CAGCG   | CCCTGAAA | ...         | AGCAGC             | AACAGCTC           | CAGCAGC         | GAGAGT       | CACGAGTCC | CACTGAGA |     |     | 607 |
| SCPP1'LW     | ...    | ATTGA  | AGGTACT | GAGTAT  | AGTAC   | GAGCAAC  | ...         | AGCAGC             | AGCAGCAGCAGCAGCAGC | AGCAGC          | GAAAGCACT    | GAGT      |          |     |     | 577 |
| SCPP1'PN     | TGTG   | GTTGAC | AGCAAC  | GAGACC  | CAGT    | GAGAGCA  | GAAGCAGCAAC | AGCAGT             | AGCAGCAAC          | AGAG            | AGCCGAGAGTCC | CAGCCACA  |          |     |     | 601 |
| SCPP1'PP     |        |        |         |         |         |          |             |                    |                    |                 |              |           |          |     |     | 171 |
| SCPP1-C1'CC  | TATT   | GTTGAC | CGGA    | ACTGAGT | ACAGTAC | CAGCAA   | CAGCAGCAGC  | AGCAGCAGCAGCAGCAGT | AGCAGT             | GAAAGCAC        | AGAGT        |           |          |     |     | 622 |
| SCPP1-C2'CC  | TAGT   | GTTGAT | TGGTACT | GAGTAC  | AGTACT  | AGCAA    | CAGCAGCAGC  | AGCAGCAGCAGT       | AGCAGC             | AGCAGT          | GAAAGCAC     | CGAGT     |          |     |     | 622 |
| SCPP1-C1'SR  | TATT   | GTTGAC | GGTACT  | GAGTAC  | AGTACT  | AGCAAT   | .....       | AGCAGCAGCAGCAGCAGT | AGCAGC             | AGCAGT          | GAAAGCAC     | CGAGT     |          |     |     | 478 |
| SCPP1-C2'SR  | TAGT   | GTTGAC | GGTACT  | GAGTAC  | AGTACT  | AGCAAT   | .....       | AGCAGCAGCAGCAGCAGT | AGCAGC             | AGCAGT          | GAAAGCACT    | GAGT      |          |     |     | 613 |
| SCPP1-C1'SA  | TATT   | GTTGAC | GGTACT  | GAGTAC  | AGTACT  | AGCAAT   | .....       | AGCAGCAGCAGCAGCAGT | AGCAGC             | AGCAGT          | GAAAGCAC     | CGAGT     |          |     |     | 613 |
| SCPP1-C2'SA  | TAGT   | GTTGAC | GGTACT  | GAGTAC  | AGTACT  | AGCAAT   | .....       | AGCAGCAGCAGCAGCAGT | AGCAGC             | AGCAGT          | GAAAGCACT    | GAGT      |          |     |     | 610 |
| SCPP1-C1'SG  | TATT   | GTTGAC | GGTACT  | GAGTAC  | AGTACT  | AGCAAT   | .....       | AGCAGCAGCAGCAGCAGT | AGCAGC             | AGCAGT          | GAAAGCAC     | CGAGT     |          |     |     | 595 |
| SCPP1-C2'SG  | TAGT   | GTTGAC | GGTACT  | GAGTAC  | AGTACT  | AGCAAT   | .....       | AGCAGCAGCAGCAGCAGT | AGCAGC             | AGCAGT          | GAAAGCAC     | CGAGT     |          |     |     | 559 |

|                     | 610         | 615     | 620     | 625    | 630    | 635    | 640    | 645    | 650   | 655     | 660     | 665     | 670   | 675    | 680   | 685  |     |
|---------------------|-------------|---------|---------|--------|--------|--------|--------|--------|-------|---------|---------|---------|-------|--------|-------|------|-----|
| <i>conservation</i> | ****        | ****    | ****    | *****  | ****   | ****   | ****   | *****  | ****  | ****    | ****    | ****    | ****  | ****   | ****  | **** |     |
| <i>SCPP1'C1</i>     | CCAAAAACAG  | CGCAGT  | TGGAT   | TAGC   | GAAAGT | CGCTCA | ACTG   | AGTGCC | TTCC  | CGGGGCT | GACAGC  | CAAGAAT | TGTG  | CACGCG | CAG   |      | 687 |
| <i>SCPP1'AM</i>     | CCAGCCACAG  | CACAGAG | CACAGAG | CAGCAG | GAGAG  | CAGTGC | CAAGAG | TGCC   | CGCC  | CGGAAC  | CAGACAG | CAACAG  | TGCG  | CAGCG  | CAC   |      | 417 |
| <i>SCPP1'DR</i>     | CTAAAGACAG  | CGGCAG  | TAGT    | GAAAGT | CGCTCC | ACTG   | AGTGTG | TGCT   | CGCT  | GGCGAT  | GACAGT  | CAAGAT  | TGTG  | CAGCG  | CAG   |      | 693 |
| <i>SCPP1'IP</i>     | CCACCGAGAG  | CACCG   | GAAAG   | CAAAC  | AGAGT  | CGCTCT | AACG   | AGTGCC | AGCCT | TGGAGC  | CAGAGC  | CAGGACT | TGC   | CAGCG  | CAC   |      | 687 |
| <i>SCPP1'LW</i>     | CCAAAAAGC   | AGTGC   | GATGG   | AGAGC  | GAAAGT | CGCTCA | ACTG   | AGTGCC | TTCC  | CGGGGCT | GACAGC  | CAAGAAT | TGTG  | CACGCG | CAG   |      | 657 |
| <i>SCPP1'PN</i>     | GCACAGAG    | AGCAGG  | GAAAG   | CACAG  | AGAGC  | CGCTCG | AAAG   | AGTGCC | CTCT  | GAGGCC  | GACAGC  | GATG    | AGTGC | CAGCG  | CAT   |      | 681 |
| <i>SCPP1'PP</i>     | .....       | .....   | .....   | .....  | .....  | .....  | .....  | .....  | ..... | .....   | .....   | .....   | ..... | .....  | ..... |      | 171 |
| <i>SCPP1-C1'CC</i>  | CCAAAAACAGT | GCAGT   | TGGAC   | AGCG   | GAAAGT | CGCTT  | AAGT   | AGTGCC | AGCC  | AGGGGCT | GACAGC  | CAAGAAT | TGTG  | CACGCG | CAG   |      | 702 |
| <i>SCPP1-C2'CC</i>  | CCAAAAACAAC | GCAGT   | TGGAC   | AGT    | GAAAGT | CGCTC  | AGCT   | AGTGCC | AGCC  | AGGGGCT | AACAGC  | CAAGAAT | TGTG  | CACGCG | CAG   |      | 702 |
| <i>SCPP1-C1'SR</i>  | CCAAAAACAGT | GCAGT   | TGGAC   | AGCG   | GAAAGT | CGCTCA | ACTG   | AGTGCC | AGCC  | AGGGGCT | GACAGC  | CAAGAAT | TGTG  | CACGCG | CAG   |      | 558 |
| <i>SCPP1-C2'SR</i>  | CCAAAAACAGT | GCAGT   | TGGAC   | AGCG   | GAAAGC | CGCTC  | AGCT   | AGTGCC | AGTC  | AGGGGCT | GACAGC  | CAAGAAT | TGTG  | CACGCG | CAG   |      | 693 |
| <i>SCPP1-C1'SA</i>  | CCAAAGACAG  | CGCAGT  | TGGAC   | AGT    | GAAAGT | CGCTCA | ATTG   | AGTGCC | AGCC  | AGGGGCT | GACAGC  | CAAGAAT | TGTG  | CACGCG | CAG   |      | 693 |
| <i>SCPP1-C2'SA</i>  | CCAAAAACAGT | GCAGC   | AGACAG  | C      | GAAAGC | CGCTC  | AGCT   | AGTGCC | AGCC  | AGAGGCT | GACAGC  | CAAGAAT | TGTG  | CACGCG | CAG   |      | 690 |
| <i>SCPP1-C1'SG</i>  | CCAAACACAG  | CGCAGT  | TGGAC   | AGCG   | GAAAGT | CGCTCA | ACTG   | AGTGCC | AGCC  | AGGGGCT | GACAGC  | CAAGAAT | TGTG  | CACGCG | CAG   |      | 675 |
| <i>SCPP1-C2'SG</i>  | CCAAAAACAGT | GCACCG  | ACAG    | C      | GAAAGC | CGCTC  | AGCT   | AGTGCC | AGCC  | AGAGGCT | GACAGC  | CAAGAAT | TGTG  | CACGCG | CAG   |      | 639 |

|              | 690     | 695     | 700            | 705           | 710              | 715            | 720                 | 725   | 730   | 735   | 740   | 745   | 750   | 755   | 760   |     |
|--------------|---------|---------|----------------|---------------|------------------|----------------|---------------------|-------|-------|-------|-------|-------|-------|-------|-------|-----|
| conservation | *****   | *****   | *****          | *****         | *****            | *****          | *****               | ***** | ***** | ***** | ***** | ***** | ***** | ***** | ***** |     |
| SCPP1'C1     | GAAGAC  | .....   | TTTCCTCAGGATAT | CGGTGATGATGGT | GCAACCGACCC      | ATTCAATGGCT    | TCCTAATGCCTGATGTCAC |       | 761   |       |       |       |       |       |       |     |
| SCPP1'AM     | GAATAC  | .....   | CAGTTCACGATCGG | AGACGATGGAGCC | ACTGACCC         | CTTCAACGGCT    | TCCACACGACCGACAACGC |       | 491   |       |       |       |       |       |       |     |
| SCPP1'DR     | GAATAAC | .....   | CTTCCTCAGGATAT | CGGTGATGATGG  | AGCAACCGACCC     | TTTCAATGGCT    | TCTTAATGCCTGATGTGCG |       | 767   |       |       |       |       |       |       |     |
| SCPP1'IP     | AGCGAC  | GAGTACG | TCTTCAGAAC     | GTTCGGAGACG   | ACGGAACCAACGACCC | ATTGACGGCT     | TCCACGTGCCTGACAGCAC |       | 767   |       |       |       |       |       |       |     |
| SCPP1'LW     | GAAGCC  | .....   | TTTCCTCAGGATAT | CGGTGATGATGGT | GCAACCGACCC      | TTTCAATGGCT    | TCCTAATGCCTGATGTCAC |       | 731   |       |       |       |       |       |       |     |
| SCPP1'PN     | GAATAC  | .....   | GACTTCACGAC    | ATCGGAGACG    | ATGGAGCCAGTGA    | ACCGCTGAACGGCT | TCCGTACGCCGAT       | ..... | 750   |       |       |       |       |       |       |     |
| SCPP1'PP     | .....   | .....   | .....          | .....         | .....            | .....          | .....               | ..... | ..... | ..... | ..... | ..... | ..... | ..... | ..... | 171 |
| SCPP1-C1'CC  | GAAGAC  | .....   | TTTCCTCAGGATAT | CGGTGATGATGGT | GCAACCGACCC      | TTTCAATGGCT    | TCCTAATGCCTGATGTCAC |       | 776   |       |       |       |       |       |       |     |
| SCPP1-C2'CC  | GAAGAC  | .....   | TTTCCTCAGGATAT | CGGTGATGATGGT | GAAACCGACCC      | TTTCAATGGCT    | TCCTAATGCCTGATGTCAC |       | 776   |       |       |       |       |       |       |     |
| SCPP1-C1'SR  | GAAGAC  | .....   | TTTCCTCAGGATAT | CGGTGATGATGGT | GCAACCGACCC      | TTTCAATGGCT    | TCCTAATGCCTGATGTCAC |       | 632   |       |       |       |       |       |       |     |
| SCPP1-C2'SR  | GAAGAC  | .....   | TTTCCTCAGGATAT | CGGTGATGATGGT | GCAACCGACCC      | TTTCAATGGCT    | TCCTAATGCCTGATGTCAC |       | 767   |       |       |       |       |       |       |     |
| SCPP1-C1'SA  | GAAGAC  | .....   | TTTCCTCAGGATAT | CGGTGATGATGGT | GCAACCGACCC      | TTTCAATGGCT    | TCCTAATGCCTGATGTCAC |       | 767   |       |       |       |       |       |       |     |
| SCPP1-C2'SA  | GAAGAC  | .....   | TTTCCTCAGGATAT | CGGTGATGATGGT | GCAACCGACCC      | TTTCAATGGCT    | TCCTAATGCCTGATGTCAC |       | 764   |       |       |       |       |       |       |     |
| SCPP1-C1'SG  | GAAGAC  | .....   | TTTCCTCAGGATAT | CGGTGATGATGGT | GCAACCGACCC      | TTTCAATGGCT    | TCCTAATGCCTGATGTCAC |       | 749   |       |       |       |       |       |       |     |
| SCPP1-C2'SG  | GAAGAC  | .....   | TTTCCTCAGGATAT | CGGTGATGATGGT | GCAACCGACCC      | TTTCAATGGCT    | TCCTAATGCCTGATGTCAC |       | 713   |       |       |       |       |       |       |     |

|              |            |     |
|--------------|------------|-----|
|              | 765        | 770 |
| conservation | *****      |     |
| SCPP1`CI     | TGAGCCCTAG | 771 |
| SCPP1`AM     | C.....     | 492 |
| SCPP1`DR     | TGAGCCCTAG | 777 |
| SCPP1`IP     | CGAG.....  | 771 |
| SCPP1`LW     | TGAGCCCTAG | 741 |
| SCPP1`PN     | .....      | 750 |
| SCPP1`PP     | .....      | 171 |
| SCPP1-C1`CC  | TGAGCCCTAG | 786 |
| SCPP1-C2`CC  | TGAGCCCTAG | 786 |
| SCPP1-C1`SR  | TGAGCCCTAG | 642 |
| SCPP1-C2`SR  | TGAGCCCTAG | 777 |
| SCPP1-C1`SA  | TGAGCCCTAG | 777 |
| SCPP1-C2`SA  | TGAGCCCTAG | 774 |
| SCPP1-C1`SG  | TGAGCCCTAG | 759 |
| SCPP1-C2`SG  | TGAGCCCTAG | 723 |

- ␣ non conserved
- X ≥ 55% conserved
- X ≥ 85% conserved
