# Supplementary material for: A Genomic Survey of SCPP Family Genes in Fishes Provides Novel Insights into the Evolution of Fish Scales
Source: MDPI journal article supplement (doi:10.3390/ijms18112432), 2017-11-16
Supplement: s1 [file s1]

|              |     |     |       |     |       |       |
|--------------|-----|-----|-------|-----|-------|-------|
|              |     | 395 |       | 400 |       | 405   |
| conservation |     | *   |       | * * |       |       |
| SCPP7'PN     | ACC | A   | TGAT  | G   | ACTAA | 405   |
| SCPP7'PP     | ATC | A   | TGAT  | G   | ACTAA | 384   |
| SCPP7'AM     | ATG | A   | GAAC  | G   | AT... | 384   |
| SCPP7'CI     | ... | .   | .     | .   | .     | 369   |
| SCPP7'DR     | ATC | A   | A     | GAT | G     | ACTAA |
| SCPP7-LW     | ... | .   | .     | .   | .     | 369   |
| SCPP7-C1'CC  | ATC | A   | TGAT  | G   | ACTAA | 402   |
| SCPP7-C2'CC  | CAA | A   | AATCA | G   | AC... | 399   |
| SCPP7-C1'SG  | ... | .   | .     | .   | .     | 342   |
| SCPP7-C2'SG  | ATC | A   | TGAT  | G   | ACTAA | 396   |
| SCPP7-C1'SA  | ... | .   | .     | .   | .     | 354   |
| SCPP7-C2'SA  | ATC | A   | TGAT  | G   | ACTAA | 396   |
| SCPP7-C1'SR  | ... | .   | .     | .   | .     | 345   |
| SCPP7-C2'SR  | ... | .   | .     | .   | .     | 369   |

- ⬜ non conserved
- ⬜ ≥ 55% conserved
- ⬜ ≥ 85% conserved
