# Supplementary material for: A Genomic Survey of SCPP Family Genes in Fishes Provides Novel Insights into the Evolution of Fish Scales
Source: MDPI journal article supplement (doi:10.3390/ijms18112432), 2017-11-16
Supplement: s1 [file s1]

|                     | 245   | 250                 | 255             | 260             | 265             | 270             | 275             | 280             | 285             | 290             | 295             | 300             | 305             |
|---------------------|-------|---------------------|-----------------|-----------------|-----------------|-----------------|-----------------|-----------------|-----------------|-----------------|-----------------|-----------------|-----------------|
| <i>conservation</i> | * ! * | ! * ! * ! * ! * ! * | ! * ! * ! * ! * | ! * ! * ! * ! * | ! * ! * ! * ! * | ! * ! * ! * ! * | ! * ! * ! * ! * | ! * ! * ! * ! * | ! * ! * ! * ! * | ! * ! * ! * ! * | ! * ! * ! * ! * | ! * ! * ! * ! * | ! * ! * ! * ! * |
| <i>SCPP5'</i> AM    | T     | T                   | C               | C               | A               | T               | C               | C               | A               | G               | G               | C               | T               |
| <i>SCPP5'</i> PN    | T     | T                   | T               | C               | C               | A               | T               | C               | C               | A               | G               | G               | C               |
| <i>SCPP5'</i> CI    | T     | T                   | C               | C               | A               | G               | C               | A               | A               | G               | G               | T               | T               |
| <i>SCPP5'</i> DR    | T     | T                   | C               | C               | C               | A               | C               | A               | A               | G               | C               | G               | T               |
| <i>SCPP5'</i> LW    | T     | T                   | C               | C               | T               | A               | C               | A               | A               | G               | C               | G               | T               |
| <i>SCPP5'</i> PP    | T     | T                   | C               | C               | T               | A               | C               | A               | A               | G               | C               | G               | T               |
| <i>SCPP5-C1'</i> CC | T     | T                   | C               | C               | T               | A               | C               | A               | A               | G               | C               | G               | T               |
| <i>SCPP5-C2'</i> CC | T     | T                   | C               | C               | T               | A               | C               | A               | A               | G               | C               | G               | T               |
| <i>SCPP5-C1'</i> SA | C     | T                   | G               | A               | T               | G               | C               | A               | G               | A               | G               | T               | T               |
| <i>SCPP5-C2'</i> SA | T     | T                   | C               | C               | T               | A               | C               | A               | A               | G               | C               | G               | T               |
| <i>SCPP5-C1'</i> SG | T     | T                   | C               | C               | T               | A               | C               | A               | A               | G               | C               | G               | T               |
| <i>SCPP5-C2'</i> SG | T     | T                   | C               | C               | T               | A               | C               | A               | A               | G               | C               | G               | T               |
| <i>SCPP5-C1'</i> SR | A     | G                   | T               | C               | A               | G               | T               | T               | C               | G               | T               | T               | C               |
| <i>SCPP5-C2'</i> SR | T     | T                   | C               | C               | T               | A               | C               | A               | A               | G               | C               | G               | T               |
