# Supplementary material for: A Genomic Survey of SCPP Family Genes in Fishes Provides Novel Insights into the Evolution of Fish Scales
Source: MDPI journal article supplement (doi:10.3390/ijms18112432), 2017-11-16
Supplement: s1 [file s1]

|               |         |       |       |       |       |       |       |       |       |       |       |       |       |       |       |       |        |       |       |       |       |        |     |    |
|---------------|---------|-------|-------|-------|-------|-------|-------|-------|-------|-------|-------|-------|-------|-------|-------|-------|--------|-------|-------|-------|-------|--------|-----|----|
| conservation  | 5       | 10    | 15    | 20    | 25    | 30    | 35    | 40    | 45    | 50    | 55    | 60    | 65    | 70    | 75    | 80    |        |       |       |       |       |        |     |    |
| SCPP9'DR      | ATGAAGA | AAC   | TTTG  | TTCA  | ATT   | CTTT  | ATGG  | TACT  | AAG   | CATT  | ACT   | GCTC  | ATGCC | ACTT  | CAGC  | TAAGA | AAGCTT | CTTG  | TGGT  | CA    | 80    |        |     |    |
| SCPP9' LW     | ATGAAGA | AAC   | TTTG  | TTTG  | TTC   | ATCT  | TTT   | ATGG  | TACT  | GCC   | ATA   | ATGG  | CTG   | ATAT  | CAC   | CTCAG | CAAG   | CTGC  | ACTT  | ATTT  | TTAG  | 80     |     |    |
| SCPP9' PP     | ATGAAGA | AAC   | TTTG  | TTGT  | CAT   | CTTT  | ATGG  | TACT  | GCC   | ATA   | ATGG  | CTG   | ATAT  | CAC   | CAG   | CTCA  | AGA    | AAG   | CTG   | CGT   | CTGAT | CA     | 80  |    |
| SCPP9- CI     | ATGAAGA | AAC   | TTTG  | TTTT  | CGT   | CTTT  | ATGG  | TTCT  | GACC  | CATA  | AAT   | TGCT  | GAT   | ATC   | AG    | CTCAG | CTCA   | AGA   | AAG   | CTG   | CGT   | CTGAT  | CA  | 80 |
| SCPP9- C1' CC | .....   | AAG   | TACT  | TTAT  | CAT   | CTTT  | ATGG  | TTCT  | GACT  | GTA   | ATT   | TGCT  | GAT   | ATC   | AC    | CTCAG | CTCA   | AGA   | AAG   | CTG   | CGACT | TAT    | CAG | 74 |
| SCPP9- C2' CC | ATGAAGA | AAC   | TTTG  | TTATA | ACC   | ATT   | ATGG  | CTCT  | GAC   | CGTAA | TTG   | CTG   | ATAT  | CAC   | CTCAG | CTCA  | AGA    | AAG   | CTG   | CGT   | CTGAT | CA     | 80  |    |
| SCPP9- C1' SG | ATGAAGA | AA    | TTTG  | TTATA | AAT   | CTTT  | ATGG  | TTCT  | GAC   | CGTAA | TTG   | CTG   | ATAT  | CAC   | CTCAG | CTCA  | AGA    | AAG   | CTT   | CAT   | CTGAT | CA     | 80  |    |
| SCPP9- C2' SG | ATGAAGA | AAC   | TTTG  | TTAT  | GAC   | CA    | TTT   | ATGG  | TTCT  | GAC   | CGTAA | TTG   | CTG   | ATAT  | TAC   | CTCAG | CTCA   | AGA   | AAG   | CTG   | CGT   | CTGAT  | TAA | 77 |
| SCPP9- C1' SA | ATGAAGA | AA    | TTTG  | TTATA | AAT   | CTTT  | ATGG  | TTCT  | GACT  | GTA   | ATT   | TGCT  | GAT   | ATC   | AC    | CTCAG | CTCA   | AGA   | AAG   | CTG   | CA    | TCTGAT | CA  | 80 |
| SCPP9- C2' SA | .....   | ..... | ..... | ..... | ..... | ..... | ..... | ..... | ..... | ..... | ..... | ..... | ..... | ..... | ..... | ..... | .....  | ..... | ..... | ..... | ..... | CTGAT  | CA  | 8  |
| SCPP9- C1' SR | ATGAAGA | AA    | TTTG  | TTATA | AAT   | CTTT  | ATGG  | TTCT  | GAC   | CGTAA | TTG   | CTG   | ATAT  | CAC   | CTCAG | CTCA  | AGA    | AAG   | CTG   | CGT   | CTGAT | CA     | 80  |    |
| SCPP9- C2' SR | ATGAAGA | AAC   | TTTG  | TTAT  | GAC   | CA    | TTT   | ATGG  | TTCT  | GAC   | CGTAA | TTG   | CTG   | ATAT  | CAC   | CTCAG | CTCA   | AGA   | AAG   | CTG   | CGT   | CTGAT  | CA  | 80 |

conservation

|             |    |    |    |     |     |     |   |     |     |     |     |     |     |     |     |   |
|-------------|----|----|----|-----|-----|-----|---|-----|-----|-----|-----|-----|-----|-----|-----|---|
|             | 85 | 90 | 95 | 100 | 105 | 110 |   | 115 | 120 | 125 | 130 | 135 | 140 | 145 | 150 |   |
| SCPP9'DR    | *  | !  | *  | !   | *   | !   | * | !   | *   | !   | *   | !   | *   | !   | *   | ! |
| SCPP9'LR    | C  | G  | G  | T   | C   | T   | G | A   | A   | T   | G   | G   | A   | T   | G   | A |
| SCPP9'PW    | A  | A  | C  | T   | G   | C   | G | T   | C   | T   | G   | A   | A   | T   | G   | A |
| SCPP9'PP    | C  | G  | G  | T   | C   | T   | G | A   | A   | T   | G   | G   | A   | T   | G   | A |
| SCPP9-CI    | C  | G  | G  | T   | C   | T   | G | A   | A   | T   | G   | G   | A   | T   | G   | A |
| SCPP9-C1'CC | C  | G  | G  | T   | C   | T   | G | A   | A   | T   | G   | G   | A   | T   | G   | A |
| SCPP9-C2'CC | C  | G  | G  | T   | C   | T   | G | A   | A   | T   | G   | G   | A   | T   | G   | A |
| SCPP9-C1'SG | C  | G  | G  | T   | C   | T   | G | A   | A   | T   | G   | G   | A   | T   | G   | A |
| SCPP9-C2'SG | C  | G  | G  | T   | C   | T   | G | A   | A   | T   | G   | G   | A   | T   | G   | A |
| SCPP9-C1'SA | C  | G  | G  | T   | C   | T   | G | A   | A   | T   | G   | G   | A   | T   | G   | A |
| SCPP9-C2'SA | T  | G  | G  | T   | C   | T   | G | A   | A   | T   | G   | G   | A   | T   | G   | A |
| SCPP9-C1'SR | C  | G  | G  | T   | C   | T   | G | A   | A   | T   | G   | G   | A   | T   | G   | A |
| SCPP9-C2'SR | C  | G  | G  | T   | C   | T   | G | A   | A   | T   | G   | G   | A   | T   | G   | A |

conservation

|             |   |   |   |   |   |   |   |   |   |   |   |   |   |   |   |   |   |   |   |   |   |   |   |   |   |   |   |   |   |   |   |   |   |   |   |   |   |   |   |   |   |   |   |   |   |   |   |   |   |   |   |   |   |   |     |     |     |     |   |   |  |     |
|-------------|---|---|---|---|---|---|---|---|---|---|---|---|---|---|---|---|---|---|---|---|---|---|---|---|---|---|---|---|---|---|---|---|---|---|---|---|---|---|---|---|---|---|---|---|---|---|---|---|---|---|---|---|---|---|-----|-----|-----|-----|---|---|--|-----|
| SCPP9'DR    | T | G | G | T | G | C | T | G | G | A | G | G | T | G | C | T | G | T | T | A | A | G | G | A | C | A | G | C | C | T | C | A | T | T | C | A | C | A | G | T | T | T | C | T | T | C | T | C | C | A | T | A | T |   | 231 |     |     |     |   |   |  |     |
| SCPP9'LP    | T | G | T | T | T | C | T | G | T | G | G | T | G | T | G | C | T | G | T | T | A | A | G | A | C | A | G | C | C | T | C | G | T | T | T | A | C | A | C | A | A | T | T | T | C | T | T | C | C | A | T | A | T |   | 237 |     |     |     |   |   |  |     |
| SCPP9'PP    | T | A | T | T | T | C | T | G | T | G | G | T | G | C | T | G | C | T | G | T | T | A | A | G | A | C | A | G | C | C | T | C | G | T | T | A | C | A | C | A | A | T | T | T | C | T | T | C | C | A | T | A | T |   | 231 |     |     |     |   |   |  |     |
| SCPP9-CI    | T | T | C | T | T | C | T | G | T | G | G | T | G | C | T | G | C | T | G | T | T | A | A | G | A | C | A | G | C | C | T | C | A | T | T | A | A | C | A | C | A | G | T | T | T | C | T | T | C | C | A | T | A | T |     | 231 |     |     |   |   |  |     |
| SCPP9-C1'CC | T | G | C | T | T | C | T | G | T | G | G | T | C | A | G | C | T | G | T | T | A | T | T | G | G | A | C | A | G | C | C | T | C | G | T | T | A | G | C | G | A | C | A | A | A | T | A | C | T | T | C | T | T | T | C   | C   | A   | T   | A | T |  | 228 |
| SCPP9-C2'CC | T | G | C | T | C | T | G | T | G | G | T | C | T | G | T | G | T | T | A | T | A | G | A | C | A | G | C | C | T | C | A | T | T | A | G | C | A | C | A | G | A | T | T | T | C | T | T | C | C | A | T | A | T |   | 231 |     |     |     |   |   |  |     |
| SCPP9-C1'SG | T | G | C | T | C | T | G | T | G | G | T | C | T | G | T | G | T | T | A | T | T | G | G | A | C | A | G | C | C | T | C | A | T | T | A | G | C | A | C | A | G | A | T | T | T | C | T | T | C | C | C | A | T | A | T   |     | 231 |     |   |   |  |     |
| SCPP9-C2'SG | T | G | C | T | T | C | T | G | T | G | G | T | C | T | G | C | T | G | T | T | A | T | A | G | A | C | A | G | C | T | T | C | A | T | T | A | G | C | A | T | A | G | A | T | T | T | C | T | T | C | C | T | C | A | T   | T   |     | 228 |   |   |  |     |
| SCPP9-C1'SA | T | G | C | T | T | C | T | G | T | G | G | T | C | T | G | T | T | A | T | T | G | G | A | C | A | G | C | C | T | C | A | T | T | A | G | C | A | C | A | G | A | T | T | T | C | T | T | C | C | C | A | T | A | T |     | 231 |     |     |   |   |  |     |
| SCPP9-C2'SA | T | G | C | T | T | C | T | G | T | G | G | T | C | T | G | C | T | G | T | T | A | T | A | G | A | C | A | G | C | C | T | C | A | T | T | A | G | C | A | C | A | G | A | T | T | T | C | T | T | C | C | C | A | T | T   |     | 147 |     |   |   |  |     |
| SCPP9-C1'SR | T | G | C | T | T | C | T | G | T | G | G | T | C | T | G | T | T | A | T | T | G | G | A | C | A | G | C | C | T | C | A | T | T | A | G | C | A | C | A | G | A | T | T | T | C | T | T | C | C | C | A | T | A | T |     | 231 |     |     |   |   |  |     |
| SCPP9-C2'SR | T | G | C | T | T | C | T | G | T | G | G | T | C | T | G | C | T | G | T | T | A | T | A | G | A | C | A | G | C | C | T | C | A | T | T | A | G | C | A | C | A | G | A | T | T | T | C | T | T | C | C | C | A | T | T   |     | 231 |     |   |   |  |     |

|                        |             |           |        |        |         |       |       |        |           |           |          |         |        |          |        |        |      |     |     |
|------------------------|-------------|-----------|--------|--------|---------|-------|-------|--------|-----------|-----------|----------|---------|--------|----------|--------|--------|------|-----|-----|
|                        | 235         | 240       | 245    | 250    | 255     | 260   | 265   | 270    | 275       | 280       | 285      | 290     | 295    | 300      | 305    |        |      |     |     |
| conservation           |             |           | *      | *      | *       |       | *     | *      | *         | *         | *        | *       | *      | *        | *      |        |      |     |     |
| SCPP9 <sup>DR</sup>    | GTGCTTCAG   | ...       | CCTCCA | GTGGC  | AC      | CAGCT | CCCCT | TCGGC  | CTT       | CCTAAC    | GCCT     | GGAGCT  | ...    | CTGCCTTA | CCCC   | TTCCCT | CC   | 305 |     |
| SCPP9 <sup>LP</sup>    | GTGCTTCAGCA | GCC       | ACCT   | GTGGCC | G       | CAGT  | TCCCT | ACGCT  | CCACC     | CAACAT    | TGGACCT  | CAGT    | TGGCTT | AT       | CCTTT  | CGCT   | CC   | 317 |     |
| SCPP9 <sup>PP</sup>    | GTGCTTCAGCA | GCC       | ACCT   | GTGGCC | G       | CAGT  | TCCCT | ACGCT  | CCACC     | CAACAT    | TGGACCT  | CAGT    | TGGCTT | AT       | CCTTT  | CGCT   | CC   | 311 |     |
| SCPP9 <sup>CI</sup>    | GTGCTTCAGCA | GCC       | ACCT   | GTGGCC | G       | CAGT  | TCCCT | ACGCT  | CCACC     | CAACAT    | TGGACCT  | CAGT    | TGGCTT | AT       | CCTTT  | CGCT   | CC   | 311 |     |
| SCPP9-C1 <sup>CC</sup> | GTGCTTCAGCA | GCC       | ACCA   | .....  | CCAGT   | TCCCT | TCAGT | CCCC   | CTCAAC    | ATCGGACCT | CAGT     | TGGCTT  | AC     | CCCTTT   | TGTT   | TC     | 302  |     |     |
| SCPP9-C2 <sup>CC</sup> | AT          | ACTTCAGCA | GCC    | ACCT   | GTGGCC  | G     | CAGT  | TCCCT  | ATGGT     | CCCC      | CAATTT   | TGGACCT | CAGT   | TGGCTT   | AC     | CCCTTT | CGCT | TC  | 311 |
| SCPP9-C1 <sup>SG</sup> | GTGCTTCAGCA | GCC       | ACCA   | .....  | GTTCCCT | TCGGT | CCCC  | CCCAAC | ATCGGACCT | CAGT      | TGGCTT   | AC      | CCCTTT | CGGT     | TC     | 302    |      |     |     |
| SCPP9-C2 <sup>SG</sup> | GTGCTTCAGCA | CCC       | ACCT   | GTGGCC | G       | CAGT  | TCCCT | ATGGT  | CCCC      | CAACAT    | TGGACCT  | CAGT    | TGGCTT | AC       | CCCTTT | CGCT   | TC   | 308 |     |
| SCPP9-C1 <sup>SA</sup> | GTGCTTCAGCA | GCC       | ACCA   | .....  | GTTCCCT | TCGGT | CCCC  | CCCAAC | ATCGGACCT | CAGT      | TGGCTT   | AC      | CCCTTT | CGGT     | TC     | 302    |      |     |     |
| SCPP9-C2 <sup>SA</sup> | GTGCTTCAGCA | CCC       | ACCT   | GTGGCC | G       | CAGT  | TCCCT | ATGGT  | CCCC      | CAACAT    | TGGACCT  | CAGT    | TGGCTT | AC       | CCCTTT | CGCT   | TC   | 227 |     |
| SCPP9-C1 <sup>SR</sup> | GTGCTTCAGCA | GCC       | ACCA   | .....  | GTTCCCT | TCGGT | CCCC  | CCCAAC | ATCGGACCT | CAGT      | TGGCTT   | AC      | CCCTTT | CGGT     | TC     | 302    |      |     |     |
| SCPP9-C2 <sup>SR</sup> | GTGCTTCAGCA | CCC       | ACCT   | GTGGCC | G       | CAGT  | TCCCT | ATGGT  | CCCC      | CAACAT    | TGGAAGCT | TGGCTT  | ACTT   | AC       | CCCTTT | CGCT   | TC   | 311 |     |

|                                |    |        |        |     |     |                   |       |                  |                  |              |          |              |              |       |              |       |     |  |
|--------------------------------|----|--------|--------|-----|-----|-------------------|-------|------------------|------------------|--------------|----------|--------------|--------------|-------|--------------|-------|-----|--|
|                                |    | 310    | 315    | 320 | 325 | 330               | 335   | 340              | 345              | 350          | 355      | 360          | 365          | 370   | 375          | 380   | 385 |  |
| conservation                   | *  | !      | !      | !   | !   | !                 | !     | !                | !                | !            | !        | !            | !            | !     | !            | !     | !   |  |
| SCPP9 <sup>DR</sup>            | CG | CTAA   | TGGGGG | CT  | TG  | CCGTATT           | TG    | TGGCTGGA         | CTT              | CCTAATCAACCT | GCG      | TAAT         | TCCCTC       | CT    | CAGCAACAAGTT | TGCGG | 385 |  |
| SCPP9 <sup>LW</sup>            | CT | CTAAC  | GGGGG  | GC  | TG  | CCGTATTACATTGGTGG | G     | CCCCAGAATCAACCAG | GGT              | TATTCCTC     | CT       | CAGCAGCAAGTT | TGCGG        |       |              |       | 397 |  |
| SCPP9 <sup>PP</sup>            | CT | CTAAC  | GGGGG  | GC  | TG  | CCGTATTACATTGGTGG | G     | CCCCAGAATCAACCAG | GGAT             | TATTCCTC     | CT       | CAGCAGCAAGTT | TGCGG        |       |              |       | 391 |  |
| SCPP9- <i>CI</i>               | CT | CTAAC  | GGGGG  | GC  | TG  | CCGTATTACATTGGTGG | G     | CCCCAGAATCAACCAG | G                | CAAT         | TATTCCTC | CT           | CAGCAACAAGTT | TGCGG |              |       | 391 |  |
| SCPP9- <i>C1</i> <sup>CC</sup> | A  | TCTAAT | TGGGGG | GT  | TG  | CTGTATTACATTGGTGG | A     | CCCCAGAATCAACCAG | CCAT             | GATCCCTC     | CG       | AACAACAAGCT  | TGCGA        |       |              |       | 382 |  |
| SCPP9- <i>C2</i> <sup>CC</sup> | A  | CTAAT  | TGGGGG | TT  | TG  | CAATTACATTGGTGG   | G     | CCCCAGAATCAACCAG | CCAT             | TAATGCTCT    | CG       | ...CAGCAAGTT | TATGG        |       |              |       | 388 |  |
| SCPP9- <i>C1</i> <sup>SG</sup> | A  | CTAAT  | TGGGGG | AC  | TG  | CCGTATTACATTGGTGG | A     | CCCCAGAATCAACCAG | CCAT             | GATCCCTC     | CG       | CAGCAACAAGTT | TGCGG        |       |              |       | 382 |  |
| SCPP9- <i>C2</i> <sup>SG</sup> | A  | CTAAT  | TGGGGG | TT  | TG  | CCGTATTACATTGGTGG | G     | CCCCAGAATCAACCAG | CCAT             | TAATGCTCT    | CG       | CAGCAACAAGTT | TGCGG        |       |              |       | 388 |  |
| SCPP9- <i>C1</i> <sup>SA</sup> | A  | CTAAT  | TGGGGG | AC  | TG  | CCGTATTACATTGGTGG | A     | CCCCAGAATCAACCAG | CCAT             | GATCCCTC     | CG       | CAGCAACAAGTT | TGCGG        |       |              |       | 382 |  |
| SCPP9- <i>C2</i> <sup>SA</sup> | A  | CTAAT  | TGGGGG | TT  | TG  | CCGTATTACATTGGTGG | G     | CCCCAGAATCAACCAG | CCAT             | TAATGCTCT    | CG       | CAGCAACAAGTT | TGCGG        |       |              |       | 307 |  |
| SCPP9- <i>C1</i> <sup>SR</sup> | A  | CTAAT  | TGGGGG | AC  | TG  | CCGTATTACATT      | AGTGG | A                | CCCCAGAATCAACCAG | CCAT         | GATCCCTC | CG           | CAGCAACAAGTT | TGCGG |              |       | 382 |  |
| SCPP9- <i>C2</i> <sup>SR</sup> | A  | CTAAT  | TGGGGG | TT  | TG  | CCGTATTACATTGGTGG | G     | CCCCAGAATCAACCAG | CCAT             | TAATGCTCT    | CG       | CAGCAACAAGTT | TGCGG        |       |              |       | 391 |  |

conservation

|                        |              |       |       |     |      |        |         |     |       |       |           |           |          |      |       |       |       |     |
|------------------------|--------------|-------|-------|-----|------|--------|---------|-----|-------|-------|-----------|-----------|----------|------|-------|-------|-------|-----|
|                        | 390          | 395   | 400   | 405 | 410  | 415    | 420     | 425 | 430   |       | 435       | 440       | 445      | 450  |       |       |       |     |
|                        | !            | !     | !     | !   | !    | !      | !       | !   | !     | !     | !         | !         | !        | !    | !     |       |       |     |
| SCPP9 <sup>DR</sup>    | CTGGACAAGG   | ACCTG | CTGGA | AAT | TAAT | CAAGC  | CGTTGGG | ... | T     | TGCCA | CAA       | .....     | GGCTCACT | GGA  | AGATT | TAAAG | 453   |     |
| SCPP9 <sup>LP</sup>    | CTGGACAAGGCC | CT    | TTGGA | AAC | CAAT | CAAGCT | GCAGGCC | TAA | T     | ACCAC | CA        | .....     | GGTTCAC  | T    | GACT  | AGATT | TAAAG | 468 |
| SCPP9 <sup>PP</sup>    | CTGGACAAGGCC | CT    | TTGGA | AAC | CAAT | CAAGCT | GCAGGCC | TAA | T     | ACCAC | CA        | .....     | GGTTCAC  | T    | GACT  | AGATT | TAAAG | 462 |
| SCPP9 <sup>CI</sup>    | CTGGACAAGGCC | CT    | TTGGA | AAT | TAAC | CAAGCT | .....   | GT  | ACCAC | CA    | .....     | GGCTCACT  | T        | GACT | AGATT | TAAAG | 453   |     |
| SCPP9 <sup>C1'CC</sup> | CTGGACAAGGCC | CT    | TTGGA | AAC | CAAT | CAAGCT | .....   | GT  | ACCAC | CA    | .....     | GGCTCACT  | T        | GAAT | AGATT | TAAAG | 444   |     |
| SCPP9 <sup>C2'CC</sup> | CTGGACAAGGCC | CT    | TTGGA | AAT | TAAT | CAAGCT | .....   | GT  | ACCAC | CA    | .....     | GGCTCACT  | T        | AACT | AGATT | TAAAG | 450   |     |
| SCPP9 <sup>C1'SG</sup> | TTGGACAAGGC  | ACT   | CTGGA | AAT | TAAC | CAAGCT | .....   | GT  | ACCAC | CA    | .....     | GGCTCACT  | T        | GACT | AGATT | TAAAG | 444   |     |
| SCPP9 <sup>C2'SG</sup> | CTGGACAAGGCC | CT    | TTGGA | TAT | TAAT | CAAGCT | .....   | GT  | ACCAC | CA    | TTTGATGAA | GCAATTACT | TGGC     | AAA  | ACC   | ATT   | 459   |     |
| SCPP9 <sup>C1'SA</sup> | CTGGACAAGGCC | CT    | TTGGA | AAT | TAAT | CAAGCT | .....   | GT  | ACCAC | CA    | .....     | GGCTCACT  | T        | GACT | AGATT | TAAAG | 444   |     |
| SCPP9 <sup>C2'SA</sup> | CTGGACAAGGCC | CT    | TTGGA | AAT | TAAT | CAAGCT | .....   | GT  | ACCAC | CA    | .....     | GGCTCACT  | T        | AACT | AGATT | TAAAG | 369   |     |
| SCPP9 <sup>C1'SR</sup> | CTGGACAAGGCC | CT    | TTGGA | AAT | TAAT | CAAGCT | .....   | GT  | ACCAC | CA    | .....     | GGCTCACT  | T        | GACT | AGATT | TAAAG | 444   |     |
| SCPP9 <sup>C2'SR</sup> | CTGGACAAGGCC | CT    | TTGGA | TAT | TAAT | CAAGCT | .....   | GT  | ACCAC | CA    | .....     | GGCTCACT  | T        | AACT | AGATT | TAAAG | 453   |     |

|              |       |       |         |           |          |        |         |         |       |        |        |       |       |         |          |           |     |
|--------------|-------|-------|---------|-----------|----------|--------|---------|---------|-------|--------|--------|-------|-------|---------|----------|-----------|-----|
|              | 455   | 460   | 465     | 470       | 475      | 480    | 485     | 490     | 495   | 500    | 505    | 510   | 515   | 520     | 525      | 530       |     |
| conservation | !!!!* | !!!!* | !!!!    | !!!!      | !!!!     | !!!!   | !!!!    | !!!!    | !!!!  | !!!!   | !!!!   | !!!!  | !!!!  | !!!!    | !!!!     | !!!!      |     |
| SCPP9'DR     | CGATC | ATT   | TAT     | TCAGA     | AGGACCAC | AGCA   | AGACCA  | CCTGTCT | CAG   | TCACC  | CAGAT  | GCCT  | GCT   | CAGCT   | CAGCCCT  | ACTGTGTC  | 533 |
| SCPP9'LV     | CGCTC | CTT   | CCTCAGA | AGGACCACA | ...      | AGACCA | CCTGTCT | CC      | ATCAC | CCAGAT | CC     | CAGCT | CAGGT | CAGCCCA | ACTGTGTC |           | 545 |
| SCPP9'PP     | CGCTC | CTT   | CCTCAGA | AGGACCACA | ...      | AGACCA | CCTGTCT | CAG     | TCACC | CAGAT  | CC     | CAGCT | CAGGT | CAGCCCA | ACTGTGTC |           | 539 |
| SCPP9-CI     | CGCTC | CTT   | CCTCAGA | AGGA      | ACACT    | GC     | GAGACCA | CCTGTCT | CAAT  | CACC   | CAGAT  | GCC   | AGCT  | CAGCT   | CAGCCCT  | ACTGTGTC  | 533 |
| SCPP9-C1'CC  | CGCTC | CTT   | CCTCAGA | AGGACCAC  | AGCA     | AGACCA | CCTGT   | TAAT    | AATT  | ATTTT  | AT     | GCC   | AGCT  | CAAGT   | CAACCCT  | TGCTGTGTC | 524 |
| SCPP9-C2'CC  | CGCTC | TTT   | CTCAGA  | AGGACCAC  | TGCA     | AGA    | CCA     | CCTGTCT | TAAT  | CACC   | CAGAT  | GCC   | AGCT  | CAGGT   | CAACCCT  | TGCTGTGTC | 530 |
| SCPP9-C1'SG  | CGCTC | CTT   | CCTCAGA | AGGACCAC  | AGCA     | AGA    | ...     | CCTGTCT | CAAT  | CACC   | CAGAT  | GCC   | AGT   | TCAGAT  | CAACCCT  | TGCTGTGCC | 521 |
| SCPP9-C2'SG  | CGCTC | CTT   | CCTCAGA | AGGACCAC  | TGCA     | AGA    | CCA     | CCTGTCT | CAAT  | CACC   | CAGAT  | GCC   | AGCC  | CAGGT   | CAACCCT  | TGCTGTGTC | 539 |
| SCPP9-C1'SA  | CGCTC | CTT   | CCTCAGA | AGGACCAC  | AGCA     | AGA    | ...     | CCTGTCT | CAAT  | CACC   | CAGAT  | GCC   | AGCT  | TCAGAT  | CAACCCT  | TGCTGTGCC | 521 |
| SCPP9-C2'SA  | CGCTC | CTT   | CCTCAGA | AGGACCAC  | TGCA     | AGA    | CCA     | CCTGTCT | CAAT  | CACC   | CAGAT  | GCC   | AGCC  | CAGGT   | CAACCCT  | TGCAGTGTC | 449 |
| SCPP9-C1'SR  | CGCTC | CTT   | CCTCAGA | AGGACCAC  | AGCA     | AGA    | ...     | CCTGTCT | CAAT  | CAC    | ACAGAT | GCC   | AGCT  | TCAGAT  | CAACCCT  | TGCTGTGCC | 521 |
| SCPP9-C2'SR  | CGCTC | CTT   | CCTCAGA | AGGACCAC  | TGCA     | AGA    | CCA     | CCTGTCT | CAAT  | CACC   | CAGAT  | GCC   | AGCC  | CAGGT   | CAACCCT  | TGCTGTGTC | 533 |

|              |         |        |         |        |     |
|--------------|---------|--------|---------|--------|-----|
|              | 535     | 540    | 545     | 550    |     |
| conservation | !!!!!   | !*     | *****   | *****  |     |
| SCPP9'DR     | TGGAAAT | A      | CTGTTGG | CTAA   | 552 |
| SCPP9'LV     | TGGAAAT | .....  |         |        | 552 |
| SCPP9'PP     | TGGAAAT | .....  |         |        | 546 |
| SCPP9-CI     | TGGAAAT | T      | CTGT    | GGGTAA | 552 |
| SCPP9-C1'CC  | TGGAAAC | CCTGTT | GGGTAA  |        | 543 |
| SCPP9-C2'CC  | TGGAAAT | CCTGTT | GGGTAA  |        | 549 |
| SCPP9-C1'SG  | TGGAAAT | CCTGTT | GGGTAA  |        | 540 |
| SCPP9-C2'SG  | TGGAAAT | CCTGTT | GGGTAA  |        | 558 |
| SCPP9-C1'SA  | TGGAAAT | CCTGTT | GGGTAA  |        | 540 |
| SCPP9-C2'SA  | TGGAAAT | CCTGTT | GGGTAA  |        | 468 |
| SCPP9-C1'SR  | TGGAAAT | CCTGTT | GGGTAA  |        | 540 |
| SCPP9-C2'SR  | TGGAAAT | CCTGTT | GGGTAA  |        | 552 |

- ⓧ

non conserved
- ⓧ

≥ 55% conserved
- ⓧ

≥ 85% conserved
