# Supplementary material for: A Genomic Survey of SCPP Family Genes in Fishes Provides Novel Insights into the Evolution of Fish Scales
Source: MDPI journal article supplement (doi:10.3390/ijms18112432), 2017-11-16
Supplement: s1 [file s1]

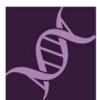

Article

# A Genomic Survey of SCPP Family Genes in Fishes Provides Novel Insights into the Evolution of Fish Scales

Yunyun Lv, Kazuhiko Kawasaki, Jia Li, Yanping Li, Chao Bian, Yu Huang, Xinxin You and Qiong Shi

**Table S1.** Accession numbers of zebrafish *SPARCL1* and *SCPP* genes.

| zebrafish      | mRNA           | Protein        |
|----------------|----------------|----------------|
| <i>SPARCL1</i> | NM_001130605.1 | NP_001124077.1 |
| <i>SPP1</i>    | AY620817.1     | AAT39545.1     |
| <i>SCPP1</i>   | EU642610.1     | ACF33438.1     |
| <i>ODAM</i>    | EU642608.1     | ACF33436.1     |
| <i>fa93e10</i> | NM_001145556.1 | NP_001139028   |
| <i>SCPP5</i>   | EU642611.1     | ACF33439.1     |
| <i>SCPP7</i>   | EU642613.1     | ACF33441.1     |
| <i>SCPP6</i>   | EU642612.1     | ACF33440.1     |
| <i>SCPP9</i>   | EU642615.1     | ACF33443.1     |

**Table S2.** Accession numbers of the ten fish genomes used for this study.

| Organism                            | Accession                                                                       |
|-------------------------------------|---------------------------------------------------------------------------------|
| <i>Astyanax mexicanus</i>           | GCF_000372685.1                                                                 |
| <i>Ctenopharyngodon idellus</i>     | <a href="http://www.ncgr.ac.cn/grasscarp/">http://www.ncgr.ac.cn/grasscarp/</a> |
| <i>Cyprinus carpio</i>              | GCA_001270105.1                                                                 |
| <i>Ictalurus punctatus</i>          | GCF_001660625.1                                                                 |
| <i>Leuciscus waleckii</i>           | GCA_900092035.1                                                                 |
| <i>Pimephales promelas</i>          | GCA_000700825.1                                                                 |
| <i>Pygocentrus nattereri</i>        | GCF_001682695.1                                                                 |
| <i>Sinocyclocheilus anshuiensis</i> | GCF_001515605.1                                                                 |
| <i>Sinocyclocheilus grahamin</i>    | GCF_001515645.1                                                                 |
| <i>Sinocyclocheilus rhinoceros</i>  | GCF_001515625.1                                                                 |
