# Supplementary material for: A Genomic Survey of SCPP Family Genes in Fishes Provides Novel Insights into the Evolution of Fish Scales
Source: MDPI journal article supplement (doi:10.3390/ijms18112432), 2017-11-16
Supplement: s1 [file s1]

|              |           |        |           |              |                      |           |                     |                    |              |                 |       |       |       |       |       |       |    |
|--------------|-----------|--------|-----------|--------------|----------------------|-----------|---------------------|--------------------|--------------|-----------------|-------|-------|-------|-------|-------|-------|----|
|              | 5         | 10     | 15        | 20           | 25                   | 30        | 35                  | 40                 | 45           | 50              | 55    | 60    | 65    | 70    | 75    | 80    |    |
| conservation | *****     | *****  | *****     | *****        | *****                | *****     | *****               | *****              | *****        | *****           | ***** | ***** | ***** | ***** | ***** | ***** |    |
| SPP1`AM      | ATGAAGG   | CCGCC  | ATTGTTTT  | CGTGCTCCTCT  | TTGCCAT              | AGTCT     | ACTGTCGT            | CCTCT              | GAAAGCGTTC   | AGTGAGCAGCTCAGA |       |       |       |       |       |       | 80 |
| SPP1`CI      | ATGAAGACT | CTTTAT | CGTTTTTA  | ACGCTCCTCG   | TTGCCACAGTCTTTCTG    | CCTAC     | CTGTCAAGCGCTCAGCT   | AGCAGTTCAGA        |              |                 |       |       |       |       |       |       | 80 |
| SPP1`DR      | ATGAAAT   | CTATT  | ATTGTTTT  | TAACACTCCTCG | TGCGCCACAGTCTTTCTGTG | TAC       | CTGTGAAAGCGCTCAGCA  | AAGCAGTTCAGA       |              |                 |       |       |       |       |       |       | 80 |
| SPP1`IP      | ATGAAGG   | CTGTCA | TTGTTTT   | CGTGCTCCTTT  | TCGCAGCGGTCTATTGT    | CAC       | CCTGTGAAACGTT       | CAGCCAGCAGCTCAGA   |              |                 |       |       |       |       |       |       | 80 |
| SPP1`LW      | ATGAAGACC | GTTAT  | CGTTTTTA  | ACCCTCCTCAT  | CGCCACAGTCTTTCTG     | CCTG      | CCTGTCAAGCGCTCAGCC  | CAGCAGTTCAGA       |              |                 |       |       |       |       |       |       | 80 |
| SPP1`PN      | ATGAAGGCC | GTCAT  | GATTTT    | CGGGCTCCTCT  | TCGCTGT              | AGTCTACTG | CCGTCTGT            | AAAAACGCTCAGCA     | AAGCAGCTCAGA |                 |       |       |       |       |       |       | 80 |
| SPP1`PP      | ATGAAGACT | GTTAT  | CGTTTTTA  | ACGCTTCTC    | ATCGCCACAGTCTTTCTG   | CCTAC     | CCTGTCAAGCGCTCAGCC  | CAGCAGTTCAGA       |              |                 |       |       |       |       |       |       | 80 |
| SPP1-C1`CC   | ATGAAGACT | GTCAT  | CGTTTTTA  | ACGCTCCTCAT  | CGCCACAGTCTTTCTGT    | TCTAC     | CTGTGAAAGCGCTCAGCT  | AGCAGTTCAGA        |              |                 |       |       |       |       |       |       | 80 |
| SPP1-C2`CC   | ATGAAGACT | GTTT   | TCGTTTTTA | ACGCTCCTCAT  | CGCCACAGTCTTTCTGT    | TCTAC     | CTGTGAAAGCGCTCAGCT  | AGCAGTTCAGA        |              |                 |       |       |       |       |       |       | 80 |
| SPP1-C1`SG   | ATGAAGACT | GTCAT  | CGTTTTTA  | ACGCTCCTCAT  | CGCCACAGT            | TTTTCTGT  | TCTAC               | CTGTGAAAGCGCTCAGCT | AGCAGTTCAGA  |                 |       |       |       |       |       |       | 80 |
| SPP1-C2`SG   | ATGAAGACT | GTTAT  | CGTTTTTA  | ACGCTCCTCAT  | CGCCACAGTCTTTCTGT    | TCTG      | CCTGTGAAAGCGCTCAGCT | AGCAGTTCAGA        |              |                 |       |       |       |       |       |       | 80 |
| SPP1-C1`SR   | ATGAAGACT | GTCAT  | CGTTTTTA  | ACGCTCCTCAT  | CGCCACAGT            | TTTTCTGT  | TCTAC               | CTGTGAAAGCGCTCAGCT | AGCAGTTCAGA  |                 |       |       |       |       |       |       | 80 |
| SPP1-C2`SR   | .....     |        |           |              |                      |           |                     |                    |              |                 |       |       |       |       |       |       | 0  |
| SPP1-C1`SA   | ATGAAGACT | GTCAT  | CGTTTTTA  | ACGCTCCTCAT  | CGCCACAGT            | TTTTCTGT  | TCTAC               | CTGTGAAAGCGCTCAGCT | AGCAGTTCAGA  |                 |       |       |       |       |       |       | 80 |
| SPP1-C2`SA   | ATGAAGACT | GTTAT  | TCGTTTTTA | ACACTCCTCAT  | CGCCACAGTCTTTCTGT    | TCTG      | CCTGTGAAAGCGCTCGGCT | AGCAGTTCAGA        |              |                 |       |       |       |       |       |       | 80 |

|              |           |            |           |            |                  |        |                |                |                |              |         |       |       |       |       |     |
|--------------|-----------|------------|-----------|------------|------------------|--------|----------------|----------------|----------------|--------------|---------|-------|-------|-------|-------|-----|
|              | 85        | 90         | 95        | 100        | 105              | 110    | 115            | 120            | 125            | 130          | 135     | 140   | 145   | 150   | 155   |     |
| conservation | *****     | *****      | *****     | *****      | *****            | *****  | *****          | *****          | *****          | *****        | *****   | ***** | ***** | ***** | ***** |     |
| SPP1`AM      | GAGT      | TCTGAGGAAC | AAGCCG    | CTGCCA     | AAACGGGCG        | CCCCAA | TTCTG          | CGG            | AAAGCCCTGC     | AAAAGCAGTGC  | AGGCA   | ....  |       |       |       | 156 |
| SPP1`CI      | GAGCTCAGA | AAGAGCTT   | GTTGCT    | GTGTTCAACG | GCCACCTCCTATTCT  | CCG    | AAAAGCTGCTGCTA | ATATGTTT       | TGAGGCAGA      | AAC          |         |       |       |       |       | 160 |
| SPP1`DR      | GAGCTCAGA | AAGAGCTT   | GTAATT    | GTGTTCAACG | GCCACCTCCTATTCT  | TCG    | AAAAGCTGCTGCCA | ATGTTT         | CCAGGTAG       | AGC          |         |       |       |       |       | 160 |
| SPP1`IP      | GAGT      | GCTGACCTG  | CAGCCTG   | TTGATACT   | CAGAGC           | .....  | ATCAAT         | GGA            | AAAAAGAATCAC   | AGTAGCCATATT | CAAAAGC |       |       |       |       | 154 |
| SPP1`LW      | GAGCTCAGA | AAGAAATG   | ATTGCT    | GTGTTCAACG | GCCACCTCCT       | CTTCTA | CA             | AAAAGCTGCTGCTG | TGATATGTTT     | CCAGGCAGA    | AAT     |       |       |       |       | 160 |
| SPP1`PN      | GAGCTCT   | GAGGAACAGG | CAGTTGCCA | AACTGCCACT | CCCCAGTTCT       | TGAT   | AAAGGCCCTGC    | AGATCCACT      | AAAGGCAG       | CAC          |         |       |       |       |       | 160 |
| SPP1`PP      | GAGCTCAGA | AAGAAATG   | ATTGCCG   | TTCAACG    | GCCACCTCCTATTCTA | ..     | AAAGCTGCTGCTG  | ATATGTTT       | CCAGGCAGA      | AAC          |         |       |       |       |       | 157 |
| SPP1-C1`CC   | GAGCTCAGA | AAGAACTT   | GTGGTT    | GTCTCAACA  | ACCACCTCCTATTCTA | CG     | AAAAGCTGCTGCTG | TATGTT         | CAAGGCAGA      | AAC          |         |       |       |       |       | 160 |
| SPP1-C2`CC   | GAGCTCAGA | AAGAACTT   | GTGACT    | GTGTTCAACA | ACCACCTCCTATTCTA | GA     | AAAAGCTGCTGCTG | TATGTT         | CAAGGCAGA      | AAC          |         |       |       |       |       | 160 |
| SPP1-C1`SG   | GAGCTCAGA | AAGAACTT   | GTGGTT    | GTCTCAACA  | ACCACCTCCTATTCTA | CG     | AAAAGCTGCTGCTG | TATGTT         | CAAGGCAGA      | AAC          |         |       |       |       |       | 160 |
| SPP1-C2`SG   | GAGCTCAGA | AAGAACTT   | GTGGTT    | GTGTTCAACG | GCCACCTCCTATTCTG | CA     | AAAAGCTGCTGCTG | TATGTT         | CAAGGCAGA      | AAC          |         |       |       |       |       | 160 |
| SPP1-C1`SR   | GAGCTCAGA | AAGAACTT   | GTGGTT    | GTCTCAACG  | GCCACCTCCTATTCTA | CG     | AAAAGCTGCTGCTG | TATGTT         | CAAGGCAGA      | AAC          |         |       |       |       |       | 160 |
| SPP1-C2`SR   | .....     |            |           |            |                  |        |                |                |                |              |         |       |       |       |       | 0   |
| SPP1-C1`SA   | GAGCTCAGA | AAGAACTT   | GTGGTT    | GTCTCAACG  | GCCACCTCCTATTCTA | CG     | AAAAGCTGCTGCTG | TATGTT         | CAAGGCAGA      | AAC          |         |       |       |       |       | 160 |
| SPP1-C2`SA   | GAGCTCAGA | AAGAACTT   | GTGGTT    | GTGTTCAACG | GCCACCTCCTATTCTG | CA     | AAAAGCTGCTGCTG | ..             | ATGTTCAAGGCAGA | AAC          |         |       |       |       |       | 157 |

|              |        |            |          |         |             |          |          |               |               |              |         |       |       |       |       |     |
|--------------|--------|------------|----------|---------|-------------|----------|----------|---------------|---------------|--------------|---------|-------|-------|-------|-------|-----|
|              | 160    | 165        | 170      | 175     | 180         | 185      | 190      | 195           | 200           | 205          | 210     | 215   | 220   | 225   | 230   |     |
| conservation | *****  | *****      | *****    | *****   | *****       | *****    | *****    | *****         | *****         | *****        | *****   | ***** | ***** | ***** | ***** |     |
| SPP1`AM      | ..GT   | AGAG       | GTTGTA   | CCTGCTC | AGGCTGT     | TAAAGCAG | CTCCAG   | AGCTTC        | AGCAGATCC     | AGAAGCAGCAGC | CGGAGCA |       |       |       |       | 234 |
| SPP1`CI      | CTACAC | AGACCACG   | CCAACAG  | AATCTA  | ATGAAAGCACA | ..       | GACAGTGC | AGATGACACT    | TGAGGAGGCAT   | TATGAGGAATCT |         |       |       |       |       | 237 |
| SPP1`DR      | CTACAC | AGACCACG   | CCAACAG  | AATCGA  | ATGAAAGCACA | ..       | GACAGCGC | AGATGACACT    | TGAGGAGGCAGAT | TGAGGAATCT   |         |       |       |       |       | 237 |
| SPP1`IP      | CTACCT | AATTTCAAGT | GTTTTATA | AATTACT | ACTCGGCA    | ..       | CATACTGT | ATTGAAAGTCACT | GCGGTTGCTGAT  | GTTAGC       |         |       |       |       |       | 231 |
| SPP1`LW      | CTACAC | AGACCACA   | CCAGCAG  | ATTCCA  | ATGAAAGCACA | ..       | GACAGTGA | AGATGACACT    | TGAGGAGGCAGAT | TGAGAAATCT   |         |       |       |       |       | 237 |
| SPP1`PN      | CTGCAC | AGGACAAA   | AACACAG  | AATCAG  | ACACAGAGGGA | ..       | GACAGTGC | AGACAGCGCAG   | ACGCAAGACACG  | CAAGAC       |         |       |       |       |       | 237 |
| SPP1`PP      | CTACAC | AGACCAC    | ACCAGCAG | ATTCCA  | ATGAAAGCACA | ..       | GACAGTGA | AGATGACACT    | TGAGGAGGAAGAT | TGAGGAATCT   |         |       |       |       |       | 234 |
| SPP1-C1`CC   | CTACAC | AGTCCACG   | CCAGGAG  | AATCCA  | ATGAAAGCACA | ..       | GACAGTGC | AGATGACAGT    | TGAGGGTGCAGAT | TGAGGAATCT   |         |       |       |       |       | 237 |
| SPP1-C2`CC   | CCACAC | AGACCAC    | ACCAGTAG | ATTCCA  | ATGAAAGCACA | ..       | GACAGTGC | AGATGACAGT    | TGAGGATGCAGAT | TGAGGAATCT   |         |       |       |       |       | 237 |
| SPP1-C1`SG   | CTACAC | AGACCACG   | CCAGCTGA | ATCCA   | ATGAAAGCACA | ..       | GACAGTGC | AGATGACAGT    | TGAGGATGCAGAT | TGAGGAATCT   |         |       |       |       |       | 237 |
| SPP1-C2`SG   | CTACAC | AGACCACG   | CCAGCTGA | ATCCA   | ATGAAAGCACA | ..       | GACAGTGC | AGATGACAGT    | TGAGGATGCAGAT | TGAGGAATCT   |         |       |       |       |       | 237 |
| SPP1-C1`SR   | CTACAC | AGACCACG   | CCAGCTGA | ATCCA   | ATGAAAGCACA | ..       | GAAAGTGC | AGATGACAGT    | TGAGGATGCAGAT | TGAGGAATCT   |         |       |       |       |       | 237 |
| SPP1-C2`SR   | .....  | CAGACCACG  | CCAGCTGA | ATCCA   | ATGAAAGCACA | ..       | GACAGTGC | AGATGACAGT    | TGAGGATGCAGAT | TGAGGAATCT   |         |       |       |       |       | 72  |
| SPP1-C1`SA   | CTACAC | AGACCACG   | CCAGCTGA | ATCCA   | ATGAAAGCACA | ..       | GACAGTGC | AGATGACAGT    | TGAGGATGCAGAT | TGAGGAATCT   |         |       |       |       |       | 237 |
| SPP1-C2`SA   | CTACAC | AGACCACG   | CCAGTAG  | AATCCA  | ATGAAAGCACA | ..       | GACAGTGC | AGATGACAGT    | TGAGGATGCAGAT | TGAGGAATCT   |         |       |       |       |       | 234 |

|              |           |              |              |              |               |         |          |            |                |              |        |       |       |       |       |       |     |
|--------------|-----------|--------------|--------------|--------------|---------------|---------|----------|------------|----------------|--------------|--------|-------|-------|-------|-------|-------|-----|
|              | 235       | 240          | 245          | 250          | 255           | 260     | 265      | 270        | 275            | 280          | 285    | 290   | 295   | 300   | 305   | 310   |     |
| conservation | *****     | *****        | *****        | *****        | *****         | *****   | *****    | *****      | *****          | *****        | *****  | ***** | ***** | ***** | ***** | ***** |     |
| SPP1`AM      | TCAT      | CGGATGAGG    | ACGACTCAGATG | AAGCTGAG     | GACTCCAGT     | TGAGAGT | GCTGAGT  | CTGGAGAA   | ACTGAGGCC      | ACCACCAC     |        |       |       |       |       |       | 314 |
| SPP1`CI      | GAAACAGAT | TGAGAACA     | AAGAGGAGA    | ACGACACTGAT  | TCCAGTGAAAGT  | ..      | GAATCTGG | GAGAACTGAG | ACCACCGCAGT    |              |        |       |       |       |       |       | 314 |
| SPP1`DR      | GAAACAGAT | TGAGAAGG     | AAGAGGAGA    | ATGAGACTGACT | CCAGTGAGAGT   | ..      | GAATCTGG | GAGAACTG   | GATACCACCATCAT |              |        |       |       |       |       |       | 314 |
| SPP1`IP      | TCTGAAGAG | GAGTATGATGAT | GATGATGATGAT | GACAGTGA     | CAGCGATGAGTCT | GATGAG  | AATGGC   | GAGCCAC    | CACCTTCT       | ....         |        |       |       |       |       |       | 306 |
| SPP1`LW      | GAAACAGAT | TGAGGATGAG   | ..           | GAGAATGAG    | ACTGACTCCAGT  | TGAGAGT | ..       | AATTCTGG   | GAGAACTCAG     | AGCACCGTAGT  |        |       |       |       |       |       | 311 |
| SPP1`PN      | ACTATAG   | ATTTGTGCCAGG | ATTGGGAC     | ACAGATGACT   | CCAGT         | TGAGAGT | GCTGA    | ATCAGG     | AGAGACTGAG     | GCCACTACCGT  |        |       |       |       |       |       | 317 |
| SPP1`PP      | AAAACAGAT | TGAGGATGAG   | ..           | GAGAACGAG    | ACTGACTCCAGT  | TGAGAGT | ..       | AATTCTGG   | GAGAACTCAG     | AGCACCGT     | CGT    |       |       |       |       |       | 308 |
| SPP1-C1`CC   | GAAATG    | GATGAGAACG   | AAAAGGAGA    | ACGATACTGACT | CCAGT         | TGAGAGT | ..       | GAATCTGG   | GAGAACTTGC     | GACCACCGTTGT |        |       |       |       |       |       | 314 |
| SPP1-C2`CC   | GAAACAGAT | TGAGAAGG     | AAGATGAGA    | ATGATACTGAT  | ACCAGT        | TGAGAGT | ..       | GAATCTGG   | GAGAACTTGC     | GATCACC      | CGTTGT |       |       |       |       |       | 314 |
| SPP1-C1`SG   | AAAACAGT  | TGAGAACG     | AAAAGGAGA    | ACGACTGACT   | CCAGT         | TGAGAGT | ..       | GAATCTGG   | GAGAACTC       | TGCACCAT     | CGTTGT |       |       |       |       |       | 314 |
| SPP1-C2`SG   | GAAACAGAT | TGAGAGGG     | AAGATGAGA    | ATGATACTGAT  | TCCAGT        | TGAGAGT | ..       | GAATCTGG   | GAGAACTTGC     | GATCACC      | CGTTGT |       |       |       |       |       | 314 |
| SPP1-C1`SR   | GAAACAGT  | TGAGAACG     | AAAAGGAGA    | ACGATACTGACT | CCAGT         | TGAGAGT | ..       | GAATCTGG   | GAGAACTTGC     | GACCG        | CGTTGT |       |       |       |       |       | 314 |
| SPP1-C2`SR   | GAAACAGAT | TGAGAGGG     | AAGATGAGA    | ATGATACTGAT  | ACCAGT        | TGAGAGT | ..       | GAATCTGG   | GAGAACTTGC     | GATCACC      | CGTTGT |       |       |       |       |       | 149 |
| SPP1-C1`SA   | AAAACAGCT | TGAGAATG     | AAAAGGAGA    | ACGATACTGACT | CCAGT         | TGAGAGT | ..       | GAATCTGG   | GAGAACTTGC     | GACCACCGTTGT |        |       |       |       |       |       | 314 |
| SPP1-C2`SA   | GAAACAGAT | TGAGAGGG     | AAGATGAGA    | ATGATACTGAT  | TCCAGT        | TGAGAGT | ..       | GAATCTGG   | GAGAACTC       | TGCATCACC    | CGTTGT |       |       |       |       |       | 311 |

|              |      |        |           |          |              |          |         |         |          |           |          |         |         |     |     |     |     |
|--------------|------|--------|-----------|----------|--------------|----------|---------|---------|----------|-----------|----------|---------|---------|-----|-----|-----|-----|
|              | 315  | 320    | 325       | 330      | 335          | 340      | 345     | 350     | 355      | 360       | 365      | 370     | 375     | 380 | 385 | 390 |     |
| conservation | *    | !!     | ***       | !!       | ***          | !!       | ***     | !!      | ***      | !!        | ***      | !!      | ***     | !!  | *** | !!  |     |
| SPP1`AM      | CCCA | CCTTT  | CACCGAG   | GAGCCC   | ACCCTGGG     | CCCTATT  | ATTAA   | ACGACGG | CGCGG    | GAGACA    | ACATGGG  | CTACCC  | AGCGACT |     |     |     | 394 |
| SPP1`CI      | C... | CCATCC | ACAGTAG   | AGCCCT   | CACTGGAC     | CCCATCAT | CAACAC  | AGGCGG  | GGGAGAC  | AGCATGGG  | CTACCC   | AGCGACT |         |     |     |     | 391 |
| SPP1`DR      | C... | CCAGT  | CACAGT    | CGATCCC  | ACGCTGGGT    | CCCAT    | TATCA   | ACACAGG | CGGGG    | GAGACAGT  | TTGGG    | CTACCC  | AGCGACT |     |     |     | 391 |
| SPP1`IP      | ...  | CCTCCT | ATCATAG   | AGACCACT | CTGATCC      | CTGTTAT  | TAAAT   | ..      | GGCCGT   | TGGAGACAG | CATGGG   | CTCCAG  | AGTGACT |     |     |     | 379 |
| SPP1`LW      | C... | CCATCC | ACAGT     | CGAGCC   | CTCGCTGGAC   | CCCATCAT | CAACAC  | AGGCGG  | GGGAGAC  | AGCATGGG  | CTACCC   | AGCGACT |         |     |     |     | 388 |
| SPP1`PN      | CCCA | CTGTAA | ACCGTGGAG | CCACCCT  | CTGGACCT     | TATTATT  | TGACAAC | AGGTCGT | TGGAGAC  | AGCATGGG  | CTACCC   | AGCGACT |         |     |     |     | 397 |
| SPP1`PP      | C... | CCATCC | ACAGT     | CGAGCC   | CTCGCTGGAC   | CCCATCAT | CAACAC  | AGGCGG  | GGGAGAC  | AGCATGGG  | CTACCC   | AGCGACT |         |     |     |     | 385 |
| SPP1-C1`CC   | C... | CCATT  | CACAGT    | TGAAAC   | CCCACTGGAC   | CCCATCAT | CAACAC  | AGGCGG  | GGGAGACA | ACATGG    | ACTATCCT | AGCGACT |         |     |     |     | 391 |
| SPP1-C2`CC   | C... | CCCTCC | ACAGTAG   | AACCC    | CTCACTGGAC   | CCCATCAT | CAACAC  | AGGCGG  | GGGAGACA | ACATGGG   | CTACCC   | AGCGACT |         |     |     |     | 391 |
| SPP1-C1`SG   | C... | CCCTCC | ACAGT     | TGAAAC   | CCCTCACTGGAC | CCCATCAT | CAACAC  | AGGCGG  | GGGAGAC  | AGCATGGG  | CTATCCT  | AGCGACT |         |     |     |     | 391 |
| SPP1-C2`SG   | C... | CCCTCC | ACAGTAG   | AACCC    | CTCACTGGAC   | CCCATCAT | CAACAC  | AGGCGG  | GGGAGAC  | AGCATGGG  | CTACCC   | AGCGACT |         |     |     |     | 391 |
| SPP1-C1`SR   | C... | CCCTCC | ACAGT     | TGAAAC   | CCCTCACTGGAC | CCCATCAT | CAACAC  | AGGCGG  | GGGAGAC  | AGCATGGG  | CTATCCT  | AGCGACT |         |     |     |     | 391 |
| SPP1-C2`SR   | C... | CCCTCC | ACAGTAG   | AACCC    | CTCACTGGAC   | CCCATCAT | CAACAC  | AGGCGG  | GGGAGAC  | AGCATGGG  | CTACCC   | AGCGACT |         |     |     |     | 226 |
| SPP1-C1`SA   | C... | CCCTCC | ACAGT     | TGAAAC   | CCCTCACTGGAC | CCCATCAT | CAACAC  | AGGCGG  | GGGAGAC  | AGCATGGG  | CTATCCT  | AGCGACT |         |     |     |     | 391 |
| SPP1-C2`SA   | C... | CCCTCC | ACAGTAG   | AACCC    | CTCACTGGAC   | CCCATCAT | CAACAC  | AGGCGG  | GGGAGAC  | AGCATGGG  | CTACCC   | AGCGACT |         |     |     |     | 388 |

[illegible]

|                     | 475 | 480 | 485 | 490 | 495 | 500 | 505 | 510 | 515 | 520 | 525 | 530 | 535 | 540 | 545 | 550 |   |
|---------------------|-----|-----|-----|-----|-----|-----|-----|-----|-----|-----|-----|-----|-----|-----|-----|-----|---|
| <i>conservation</i> | *   | *   | *   | *   | *   | !   | *   | *   | *   | *   | !   | *   | *   | *   | *   | *   |   |
| <i>SPP1'AM</i>      | A   | T   | C   | G   | A   | G   | G   | T   | C   | T   | G   | A   | A   | C   | A   | C   | C |
| <i>SPP1'CI</i>      | T   | T   | G   | G   | G   | C   | G   | G   | T   | T   | G   | A   | C   | A   | T   | T   |   |
| <i>SPP1'DR</i>      | C   | T   | G   | G   | G   | C   | G   | G   | T   | T   | G   | A   | C   | A   | T   | T   |   |
| <i>SPP1'IP</i>      | A   | C   | C   | A   | A   | G   | G   | T   | G   | A   | G   | A   | A   | T   | A   | G   | T |
| <i>SPP1'LW</i>      | T   | T   | A   | G   | G   | C   | G   | T   | T   | T   | G   | A   | C   | A   | T   | T   |   |
| <i>SPP1'PN</i>      | A   | C   | T   | G   | A   | T   | A   | G   | T   | A   | C   | T   | T   | T   | A   | T   |   |
| <i>SPP1'PP</i>      | T   | T   | A   | G   | G   | C   | G   | T   | T   | T   | G   | A   | C   | A   | T   | T   |   |
| <i>SPP1-C1'CC</i>   | T   | T   | G   | G   | G   | C   | G   | G   | T   | T   | G   | A   | C   | A   | T   | T   |   |
| <i>SPP1-C2'CC</i>   | T   | T   | G   | G   | G   | C   | G   | G   | T   | T   | G   | A   | C   | A   | T   | T   |   |
| <i>SPP1-C1'SG</i>   | T   | T   | G   | G   | G   | C   | G   | G   | T   | T   | G   | A   | C   | A   | T   | T   |   |
| <i>SPP1-C2'SG</i>   | T   | T   | G   | G   | G   | C   | G   | G   | T   | T   | G   | A   | C   | A   | T   | T   |   |
| <i>SPP1-C1'SR</i>   | T   | T   | G   | G   | G   | T   | G   | G   | T   | T   | G   | A   | C   | A   | T   | T   |   |
| <i>SPP1-C2'SR</i>   | T   | T   | G   | G   | G   | T   | G   | G   | T   | T   | G   | A   | C   | A   | T   | T   |   |
| <i>SPP1-C1'SA</i>   | T   | T   | G   | G   | G   | T   | G   | G   | T   | T   | G   | A   | C   | A   | T   | T   |   |
| <i>SPP1-C2'SA</i>   | T   | T   | G   | G   | G   | T   | G   | G   | T   | T   | G   | A   | C   | A   | T   | T   |   |

conservation

|            |                 |                   |           |                  |                     |                    |                     |           |                |           |           |           |
|------------|-----------------|-------------------|-----------|------------------|---------------------|--------------------|---------------------|-----------|----------------|-----------|-----------|-----------|
| 555        | 560             | 565               | 570       | 575              | 580                 | 585                | 590                 | 595       | 600            | 605       | 610       | 615       |
| * * * * *  | * * * * *       | * * * * *         | * * * * * | * * * * *        | * * * * *           | * * * * *          | * * * * *           | * * * * * | * * * * *      | * * * * * | * * * * * | * * * * * |
| SPP1'AM    | GGTTTACAAAG     | .....             | GTGCACAAT | GATGT            | TCTG                | .....              | GAGGAGGACACCAG      | CACCC     | CTGAGGAGGAGAGC | ....      |           | 615       |
| SPP1'CI    | ACTGTACAAGGCTCT | ACAGGTGCATGAT     | GCTCCTCTG | ...              | GAGGAGGAGGACACCAG   | CACCC              | CAGAGGTGGAGAAACATGG |           |                |           |           | 628       |
| SPP1'DR    | ACTGTACAAGGCTCT | CCAGGTACATGAT     | CTG       | .....            | GAGGAGCGGAACACCAG   | CACCT              | CAGAGATAGACAACATCG  |           |                |           |           | 622       |
| SPP1'IP    | ATACTGAAAA      | AAAAAAAAAGCATTACA | .....     | ATATCTGAGACTCAGT | GAGTTC              | CTTTT              | GTTTCTCAG           | ...       |                |           |           | 600       |
| SPP1'LV    | ACTGCACAGTGCTCT | ACAGGTGCATGAT     | CTTCTG    | .....            | GAGGAGGAGGACACCAG   | CACCC              | CCGAGATGGAGAACATGG  |           |                |           |           | 619       |
| SPP1'PN    | GGTGTACAAGGCTCT | GCAGGTGCACAAT     | GAAGTCCTG | .....            | GAGGAGGAT           | ACTAGCACTC         | CAGAGGAGGAGAGC      | ....      |                |           |           | 627       |
| SPP1'PP    | ACTGCACAAGGCTCT | GCAGGTGCATGAT     | CTTCTG    | .....            | GAGGAGGACAGCAGCACTC | CCGAGATGGAGAACATGG |                     |           |                |           |           | 616       |
| SPP1-C1'CC | ACTGTACAAGGCTCT | GCAGGTGCATGAT     | ACTCTCAG  | ...              | GAGGAGGACAACACCAG   | CACCC              | CAGAGGTGGAGAACATGG  |           |                |           |           | 610       |
| SPP1-C2'CC | ACTGTACAAGGCTCT | ACAGGTGCATGAT     | ACTCTCTG  | GAG              | GAGGAGGAGGACACCAG   | CACCC              | CAGAGCTGGAGAACATGG  |           |                |           |           | 622       |
| SPP1-C1'SG | ACTGTACAAGGCTCT | GCAGGTGTATGAT     | ACTCTCTG  | ...              | GAGGAGGACGACACCAG   | CACCC              | CAGAGGTGGAGAACATGG  |           |                |           |           | 628       |
| SPP1-C2'SG | ACTGTACAAGGCTCT | GCAGGTGCATGAT     | ACTCTTCTG | ..               | GAGGAGGAGGACACCAG   | CACCC              | CAGAGGTGCAGAACATGG  |           |                |           |           | 619       |
| SPP1-C1'SR | ACTGTACAAGGCTCT | GCAGGTGCATGAT     | ACTCTTCTG | ..               | GAGGAGGACGACACCAG   | CACCC              | CAGAGGTGGAGAACATGG  |           |                |           |           | 628       |
| SPP1-C2'SR | ACTGTACAAGGCTCT | GCAGGTGCATGAT     | ACTCTTCTG | ..               | GAGGAGGAGGACACCAG   | CACCC              | CAGAGGTGCAGAACATGG  |           |                |           |           | 454       |
| SPP1-C1'SA | ACTGTACAAGGCTCT | GCAGGTGTATGAT     | ACTCTTCTG | ..               | GAGGAGGACGACACCAG   | CACCC              | CAGAGGTGGAGAACATGG  |           |                |           |           | 628       |
| SPP1-C2'SA | ACTGTACAAGGCTCT | GCAGGTGCATGAT     | ACTCTTCTG | ..               | GAGGAGGAGGACACCAG   | CACCC              | CAGAGGTGCAGAACATGG  |           |                |           |           | 616       |

conservation

|                   |       |          |                |               |              |             |            |             |                |       |        |           |        |        |     |
|-------------------|-------|----------|----------------|---------------|--------------|-------------|------------|-------------|----------------|-------|--------|-----------|--------|--------|-----|
|                   | 620   | 625      | 630            | 635           | 640          | 645         | 650        | 655         | 660            | 665   | 670    | 675       | 680    | 685    | 690 |
| <i>SPP1'AM</i>    | ***** | * ** *   | * ** *         | * ** *        | * ** *       | !           | * ** *     | * ** *      | * ** *         | !     | * ** * | * ** *    | * ** * | * ** * |     |
| <i>SPP1'CI</i>    | ..... | CAGGGT   | CTGGAGGCTT     | CCAGCGGT      | ACTGAGGA     | AAGAGG      | GAGCCCAAT  | GCAAA       | GCAGG          | CGTCT | CTGGAT | GATCAACAG |        |        | 690 |
| <i>SPP1'DR</i>    |       | AGCCAA   | GCGATCGCCAGG   | TGCTCTGGGA    | AGCCAA       | GAGATCGTT   | CCCGCG     | GAAACCA     | .....          | GAG   |        |           |        |        | 690 |
| <i>SPP1'IP</i>    |       | AGGCAAAT | GAGCGCCAGGCTG  | CCCTGGGAGGCCA | AGAGATTGTT   | CCCGTT      | GGGACCAAGG | CAGCTACAGAA | GAG            |       |        |           |        |        | 696 |
| <i>SPP1'LP</i>    |       |          |                | GCTCTG        | CAGGTGCACAAT | GTTGGCTG    | GACCAGGAGT | GGACGCCT    | CCAGTGGC       |       |        |           |        |        | 654 |
| <i>SPP1'LV</i>    |       | AGCCA    | AGGAGACCGCCAGG | CGCTCTGGGA    | AGCCAA       | GAGATCGTT   | CCCGCG     | GAAACCA     | .....          | GAG   |        |           |        |        | 681 |
| <i>SPP1'PN</i>    | ..... | CAGGGT   | CTGGAGGTTG     | CCAGCAGAA     | CAGAGG       | ACGAGGGGCCA | AGTGC      | AAAGCAGG    | CATCCCTG       | ..... |        |           |        |        | 690 |
| <i>SPP1'PP</i>    |       | AGCCA    | AGGAGACCGCCAGG | CGCTCTGGGA    | AGCCAA       | GAGATCGTT   | CCCTGCG    | CGGCAACCA   | .....          | GAG   |        |           |        |        | 678 |
| <i>SPP1-C1'CC</i> |       | AGCCAA   | ACGACCGCCAGG   | CTGCTCTGGGA   | AACCAAG      | GATCGTTCC   | ACCGAA     | ACCAGG      | ATGCTACAGAA    | GAG   |        |           |        |        | 684 |
| <i>SPP1-C2'CC</i> |       | AGCCAA   | ACGACCGCCAGG   | CTCTGGGA      | AGCCAA       | GATCGTTCC   | ACCTGGA    | AAACAGG     | ATGCTACAGCAGAG |       |        |           |        |        | 696 |
| <i>SPP1-C1'SG</i> |       | AGCCAA   | ACGACCGCCAGG   | CTGCTCTGGGA   | AGCCAA       | GATCGTTCC   | ACCGAA     | ACCAGG      | ATGCTACAGCAGAG |       |        |           |        |        | 702 |
| <i>SPP1-C2'SG</i> |       | AGCCAA   | ACGACCGCCAGG   | TGCTCTGGGA    | AGCCAA       | GATATCGTT   | CCACTG     | GAAACCAGG   | ATGCTACAGCAGAG |       |        |           |        |        | 693 |
| <i>SPP1-C1'SR</i> |       | AGCCAA   | ACGACCGCCAGG   | CTGCTCTGGGA   | AGCCAA       | GATCGTTCC   | ACCGAA     | ACCAGG      | ATGCTACAGCAGAG |       |        |           |        |        | 702 |
| <i>SPP1-C2'SR</i> |       | AGCCAA   | ACGACCGCCAGG   | CTGCTGGGA     | AGCCAA       | GATATCGTT   | CCCACTG    | GAAACCAGG   | ATGCTACAGCAGAG |       |        |           |        |        | 528 |
| <i>SPP1-C1'SA</i> |       | AGCCAA   | ACGACCGCCAGG   | CTGCTGAGA     | AGCCAA       | GATCGTTCC   | ACCGAA     | ACCAGG      | ATGCTACAGCAGAG |       |        |           |        |        | 702 |
| <i>SPP1-C2'SA</i> |       | AGCCAA   | ACGACCGCCAGG   | CTGCTGGGA     | AGCCAA       | GATATCGTT   | CCACTG     | GAAACCAGG   | ATGCTACAGCAGAG |       |        |           |        |        | 690 |

[illegible]
