# Supplementary material for: A Genomic Survey of SCPP Family Genes in Fishes Provides Novel Insights into the Evolution of Fish Scales
Source: MDPI journal article supplement (doi:10.3390/ijms18112432), 2017-11-16
Supplement: s1 [file s1]

|               |                                                                                  |       |    |       |    |        |       |    |        |       |    |       |     |       |    |       |  |
|---------------|----------------------------------------------------------------------------------|-------|----|-------|----|--------|-------|----|--------|-------|----|-------|-----|-------|----|-------|--|
|               | 5                                                                                | 10    | 15 | 20    | 25 | 30     | 35    | 40 | 45     | 50    | 55 | 60    | 65  | 70    | 75 | 80    |  |
| conservation  | !!*!*!*                                                                          | ***** | *! | ***** | *! | *!*!*! | ***** | *! | *!*!*! | ***** | *! | ***** | !!* | ***** | *! | ***** |  |
| SPARCI1`CI    | ATGAAGAAAGACCTGTTTCTCTTCTGCTTTTGGTCTCTGCACTGGCTGCATATGTACAAAGTAAGCCTCGTGAAAAACA  | 80    |    |       |    |        |       |    |        |       |    |       |     |       |    |       |  |
| SPARCI1`DR    | ATGAAGAAAGAGGTGTTTCTCTTCTGCTTTTGGTAACAGCACTGGCTGCATATGTACAAAGTAAGCCTCATGGAAGGAA  | 80    |    |       |    |        |       |    |        |       |    |       |     |       |    |       |  |
| SPARCI1`IP    | ATGGAGGTTTGATCTTCTGTGCCTCTTCTGATGGCCTCAGCATTAACTGTCTACGTGCAAAGTACTCCTCATGAGAAGCA | 80    |    |       |    |        |       |    |        |       |    |       |     |       |    |       |  |
| SPARCI1`LW    | ATGAAGAAAGACCTGTTTCTATTCTGCTTTTGGTCTCTGCACTGGCTGCTTATGTACAAAGTAAGCCTCGTGAAAAAAA  | 80    |    |       |    |        |       |    |        |       |    |       |     |       |    |       |  |
| SPARCI1`PN    | ATGAAGGTTTCATCTTCTGCATCTGTGCTTTTGGTCTCAGCATTAGCCCTGACTGTGCAAAGTAAACCTCATGGAAGCA  | 80    |    |       |    |        |       |    |        |       |    |       |     |       |    |       |  |
| SPARCI1`PP    | ATGAAGAAAGACCTGTTTCTATTCTGCTTTTGGTCTCTGCACTGTCTGCTTATGTACAAAGTAAGCCTCGTGAAAAAAA  | 80    |    |       |    |        |       |    |        |       |    |       |     |       |    |       |  |
| SPARCI1-AM    | ATGAAGGTTTCGTCTTCTGTATTGTGCTTCTGGCTTCTGACTTTAGCTTCTGACTGTGAGATGTAAGCCTCATGGAAGCA | 80    |    |       |    |        |       |    |        |       |    |       |     |       |    |       |  |
| SPARCI1-C1`CC | ATGAAGAAAGACCTGTTTCTCTTCTGCTTTTGGTCTCAGCACTGGCTGCATCTGTACAAAGTAATCCTCATGAAAAAAA  | 80    |    |       |    |        |       |    |        |       |    |       |     |       |    |       |  |
| SPARCI1-C2`CC | ATGAAGAAAGACCTGATTCTTTTCTGCTTTTGGTCTCAGCACTGGCCGCATATGTACAAAGTAAGCCTCATGAAAAAAA  | 80    |    |       |    |        |       |    |        |       |    |       |     |       |    |       |  |
| SPARCI1-C1`SG | ATGAAGAAAGACCTGTTTCTCTTCTGCTTTTGGTCTCAGCACTGGCTGCATATGTACAAAGTAAGCATCATGAAAAAAA  | 80    |    |       |    |        |       |    |        |       |    |       |     |       |    |       |  |
| SPARCI1-C2`SG | ATGAAGAAAGGCCTGTTTCTCTTCTGCTTTTGGTTTCAGCACTGGCCGCATATGTACAAAGTAAGCCACATGAAAAAAA  | 80    |    |       |    |        |       |    |        |       |    |       |     |       |    |       |  |
| SPARCI1-C1`SA | ATGAAGAAAGACCTGCTTCTCTTCTGCTTTTGGTCTCAGCACTGGCTGCATATGTACAAAGTAAGCATCATGAAAAAAC  | 80    |    |       |    |        |       |    |        |       |    |       |     |       |    |       |  |
| SPARCI1-C2`SA | ATGAAGAAAGGCCTGTTTCTCTTCTGCTTTTGGTCTCAGCACTGGCCGCATATGTACAAAGTAAGCCACATGAAAAAAA  | 80    |    |       |    |        |       |    |        |       |    |       |     |       |    |       |  |
| SPARCI1-C1`SR | ATGAAGAAAGACCTGCTTCTCTTCTGCTTTTGGTCTCAGCACTGGCTGCATATGTACAGAGTAAGCATCATGAAAAAAA  | 80    |    |       |    |        |       |    |        |       |    |       |     |       |    |       |  |
| SPARCI1-C2`SR | ATGAAGAAAGGCCTGTTTCTCTTCTGCTTTTGGTCTCAGCACTGGCTGCATATGTACAAAGTAAGCCACATGAAAAATA  | 80    |    |       |    |        |       |    |        |       |    |       |     |       |    |       |  |

|               |         |                  |                 |                                         |     |       |       |            |     |
|---------------|---------|------------------|-----------------|-----------------------------------------|-----|-------|-------|------------|-----|
|               | 85      | 90               | 95              | 100                                     | 105 | 110   |       | 115        |     |
| conservation  | *****   | !***             | *****           | *****                                   | *   | ***** | !**** | *!*        | *   |
| SPARCI1`CI    | TCAG... | CATGTCAAAACACAAC | CCA             | ACTCCACAAGAG                            | ... | ...   | ...   | CAG        | 117 |
| SPARCI1`DR    | ACAG... | CACATCAAGCACATT  | GCGACTCCAAAAGAG | ...                                     | ... | ...   | ...   | CAGTCA     | 121 |
| SPARCI1`IP    | CGGGTCT | CTCTCCAGATGGTCC  | CAA             | AATTTCTAAGGAG                           | ... | ...   | ...   | GAGGATGAT  | 127 |
| SPARCI1`LW    | TCAG... | CATGTCAAAAACAAC  | CCA             | ACTCCACAAGAG                            | ... | ...   | ...   | CAG        | 117 |
| SPARCI1`PN    | TGAGTCT | CACCACAAGCACACA  | CAGTCT          | ACTAAGGAG                               | ... | ...   | ...   | AAGGAT     | 124 |
| SPARCI1`PP    | TCAG... | CATGTCAAAAACAGC  | CCA             | ACTCCACAAGAG                            | ... | ...   | ...   | CAGTTATTTA | 124 |
| SPARCI1-AM    | TGAACCT | CACAGAGAACAGTCT  | CAGTCTTTCTA     | AAGGAAAAGGAGTGGAAGAGGATTCCAGTAGCAACCTGT | ... | ...   | ...   | CAAGTCCTGA | 160 |
| SPARCI1-C1`CC | GCAG... | CATGTCAGACACAAC  | CACA            | ACTCCAAAAGAG                            | ... | ...   | ...   | CAGCCA     | 121 |
| SPARCI1-C2`CC | TCAG... | CATGCCAAACACAAG  | CTGACTCCAAAAGAG | ...                                     | ... | ...   | ...   | CAGTCG     | 121 |
| SPARCI1-C1`SG | TCAG... | CATTTCAAACACAAC  | CCGACTCCAAAAGAG | ...                                     | ... | ...   | ...   | CAGCCA     | 121 |
| SPARCI1-C2`SG | TCAG... | CATGTCAAACACAAG  | CTGACTCCAAAAGAG | ...                                     | ... | ...   | ...   | CAGTCA     | 121 |
| SPARCI1-C1`SA | TCAG... | CATTTCAAACACAAC  | CCGACTCCAAAAGAG | ...                                     | ... | ...   | ...   | CAGCCA     | 121 |
| SPARCI1-C2`SA | TCAG... | CATGTCAAACACAAG  | CTGACTCCAAAAGAG | ...                                     | ... | ...   | ...   | CAGTCA     | 121 |
| SPARCI1-C1`SR | TCAG... | CATGTCAAACACAAC  | CCGACTCCAAAAGAG | ...                                     | ... | ...   | ...   | CAGCCA     | 121 |
| SPARCI1-C2`SR | TCAG... | CATGTCAAACACAAG  | CTGACTCCAAAAGAG | ...                                     | ... | ...   | ...   | CAGTCA     | 121 |

|              |                                                                                                                                                                                                                                                                                                                                                                                                                                                                                                                                                                                                                                                                                                                                                                                                                                                                                                                                                                                                                                                                                                                                                                                                                                                                                                                                                                                                                                                                                                                                                                                                                                                                                                                                                                                                                                                                                                                                                                                                                                                                                                                                                                                                                                                                                                                                                                                                                                                                                                                                                                                                                                                                                                                                                                                                                                                                                                                                                                                                                                                                                                                                                                                                                                                                                                                                                                                                                                                                                                                                                                                                                                                                                                                                                                                                                                                                                                                                                                                                                                                                                                                                                                                                                                                                                                                                                                                                                                                                                                                                                                                                                                                                                                                                                                                                                                                                                                                                                                                                                                                                                                                                                                                                                                                                                                                                                                                                                                                                                                                                                                                                                                                                                                                                                                                                                                                                                                                                                                                                                                                                                                                                                                                                                                                                                                                                                                                                                                                                                                                                                                                                                                                                                                                                                                                                                                                                                                                                                                                                                                                                                                                                                                                                                                                                                                                                                                                                                                                                                                                                                                                                                                                                                                                                                                                                                                                                                                                                                                                                                                                                                                                                                                                                                                                                                                                                                                                                                                                                                                                                                                                                                                                                                                                                                                                                                                                                                                                                                                                                                                                                                                                                                                                                                                                                                                                                                                                                                                                                                                                                                                                                                                                                                                                                                                                                                                                                                                                                                                                                                                                                                                                                                                                                                                                                                                                                                                                                                                                                                                                                                                                                                                                                                                                                                                                                                                                                                                                                                                                                                                                                                                                                                                                                                                                                                                                                                                                                                                                                                                                                                                                                                                                                                                                                                                                                                                                                                                                                                                                                                                                                                                                                                                                                                                                                                                                                                                                                                                                                                                                                                                                                                                                                                                                                                                                                                                                                                                                                                                                                                                                                                                                                                                                                                                                                                                                                                                                                                 |     |     |     |     |     |     |     |     |     |     |     |     |     |  |
|--------------|-----------------------------------------------------------------------------------------------------------------------------------------------------------------------------------------------------------------------------------------------------------------------------------------------------------------------------------------------------------------------------------------------------------------------------------------------------------------------------------------------------------------------------------------------------------------------------------------------------------------------------------------------------------------------------------------------------------------------------------------------------------------------------------------------------------------------------------------------------------------------------------------------------------------------------------------------------------------------------------------------------------------------------------------------------------------------------------------------------------------------------------------------------------------------------------------------------------------------------------------------------------------------------------------------------------------------------------------------------------------------------------------------------------------------------------------------------------------------------------------------------------------------------------------------------------------------------------------------------------------------------------------------------------------------------------------------------------------------------------------------------------------------------------------------------------------------------------------------------------------------------------------------------------------------------------------------------------------------------------------------------------------------------------------------------------------------------------------------------------------------------------------------------------------------------------------------------------------------------------------------------------------------------------------------------------------------------------------------------------------------------------------------------------------------------------------------------------------------------------------------------------------------------------------------------------------------------------------------------------------------------------------------------------------------------------------------------------------------------------------------------------------------------------------------------------------------------------------------------------------------------------------------------------------------------------------------------------------------------------------------------------------------------------------------------------------------------------------------------------------------------------------------------------------------------------------------------------------------------------------------------------------------------------------------------------------------------------------------------------------------------------------------------------------------------------------------------------------------------------------------------------------------------------------------------------------------------------------------------------------------------------------------------------------------------------------------------------------------------------------------------------------------------------------------------------------------------------------------------------------------------------------------------------------------------------------------------------------------------------------------------------------------------------------------------------------------------------------------------------------------------------------------------------------------------------------------------------------------------------------------------------------------------------------------------------------------------------------------------------------------------------------------------------------------------------------------------------------------------------------------------------------------------------------------------------------------------------------------------------------------------------------------------------------------------------------------------------------------------------------------------------------------------------------------------------------------------------------------------------------------------------------------------------------------------------------------------------------------------------------------------------------------------------------------------------------------------------------------------------------------------------------------------------------------------------------------------------------------------------------------------------------------------------------------------------------------------------------------------------------------------------------------------------------------------------------------------------------------------------------------------------------------------------------------------------------------------------------------------------------------------------------------------------------------------------------------------------------------------------------------------------------------------------------------------------------------------------------------------------------------------------------------------------------------------------------------------------------------------------------------------------------------------------------------------------------------------------------------------------------------------------------------------------------------------------------------------------------------------------------------------------------------------------------------------------------------------------------------------------------------------------------------------------------------------------------------------------------------------------------------------------------------------------------------------------------------------------------------------------------------------------------------------------------------------------------------------------------------------------------------------------------------------------------------------------------------------------------------------------------------------------------------------------------------------------------------------------------------------------------------------------------------------------------------------------------------------------------------------------------------------------------------------------------------------------------------------------------------------------------------------------------------------------------------------------------------------------------------------------------------------------------------------------------------------------------------------------------------------------------------------------------------------------------------------------------------------------------------------------------------------------------------------------------------------------------------------------------------------------------------------------------------------------------------------------------------------------------------------------------------------------------------------------------------------------------------------------------------------------------------------------------------------------------------------------------------------------------------------------------------------------------------------------------------------------------------------------------------------------------------------------------------------------------------------------------------------------------------------------------------------------------------------------------------------------------------------------------------------------------------------------------------------------------------------------------------------------------------------------------------------------------------------------------------------------------------------------------------------------------------------------------------------------------------------------------------------------------------------------------------------------------------------------------------------------------------------------------------------------------------------------------------------------------------------------------------------------------------------------------------------------------------------------------------------------------------------------------------------------------------------------------------------------------------------------------------------------------------------------------------------------------------------------------------------------------------------------------------------------------------------------------------------------------------------------------------------------------------------------------------------------------------------------------------------------------------------------------------------------------------------------------------------------------------------------------------------------------------------------------------------------------------------------------------------------------------------------------------------------------------------------------------------------------------------------------------------------------------------------------------------------------------------------------------------------------------------------------------------------------------------------------------------------------------------------------------------------------------------------------------------------------------------------------------------------------------------------------------------------------------------------------------------------------------------------------------------------------------------------------------------------------------------------------------------------------------------------------------------------------------------------------------------------------------------------------------------------------------------------------------------------------------------------------------------------------------------------------------------------------------------------------------------------------------------------------------------------------------------------------------------------------------------------------------------------------------------------------------------------------------------------------------------------------------------------------------------------------------------------------------------------------------------------------------------------------------------------------------------------------------------------------------------------------------------------------------------------------------------------------------------------------------------------------------------------------------------------------------------------------------------------------------------------------------------------------------------------------------------------------------------------------------------------------------------------------------------------------------------------------------------------------------------------------------------------------------------------------------------------------------------------------------------------------------------------------------------------------------------------------------------------------------------------------------------------------------------------------------------------------------------------------------------------------------------------------------------------------------------------------------------------------------------------------------------------------------------------------------------------------------------------------------------------------------------------------------------------------------------------------------------------------------------------------------------------------------------------------------------------------------------------------------------------------------------------------------------------------------------------------------------------------------------------------------------------------------------------------------------------------------------------------------------------------------------------------------------------------------------------------------------------------------------------------------------------------------------------------------------------------------------------------------------------------|-----|-----|-----|-----|-----|-----|-----|-----|-----|-----|-----|-----|-----|--|
|              | 120                                                                                                                                                                                                                                                                                                                                                                                                                                                                                                                                                                                                                                                                                                                                                                                                                                                                                                                                                                                                                                                                                                                                                                                                                                                                                                                                                                                                                                                                                                                                                                                                                                                                                                                                                                                                                                                                                                                                                                                                                                                                                                                                                                                                                                                                                                                                                                                                                                                                                                                                                                                                                                                                                                                                                                                                                                                                                                                                                                                                                                                                                                                                                                                                                                                                                                                                                                                                                                                                                                                                                                                                                                                                                                                                                                                                                                                                                                                                                                                                                                                                                                                                                                                                                                                                                                                                                                                                                                                                                                                                                                                                                                                                                                                                                                                                                                                                                                                                                                                                                                                                                                                                                                                                                                                                                                                                                                                                                                                                                                                                                                                                                                                                                                                                                                                                                                                                                                                                                                                                                                                                                                                                                                                                                                                                                                                                                                                                                                                                                                                                                                                                                                                                                                                                                                                                                                                                                                                                                                                                                                                                                                                                                                                                                                                                                                                                                                                                                                                                                                                                                                                                                                                                                                                                                                                                                                                                                                                                                                                                                                                                                                                                                                                                                                                                                                                                                                                                                                                                                                                                                                                                                                                                                                                                                                                                                                                                                                                                                                                                                                                                                                                                                                                                                                                                                                                                                                                                                                                                                                                                                                                                                                                                                                                                                                                                                                                                                                                                                                                                                                                                                                                                                                                                                                                                                                                                                                                                                                                                                                                                                                                                                                                                                                                                                                                                                                                                                                                                                                                                                                                                                                                                                                                                                                                                                                                                                                                                                                                                                                                                                                                                                                                                                                                                                                                                                                                                                                                                                                                                                                                                                                                                                                                                                                                                                                                                                                                                                                                                                                                                                                                                                                                                                                                                                                                                                                                                                                                                                                                                                                                                                                                                                                                                                                                                                                                                                                                                             | 125 | 130 | 135 | 140 | 145 | 150 | 155 | 160 | 165 | 170 | 175 | 180 | 185 |  |
| conservation | * ! * * * * * * * * * * ! ! * * * * * * * * * * ! ! * * * * * * * * * * ! ! * * * * * * * * * * ! ! * * * * * * * * * * ! ! * * * * * * * * * * ! ! * * * * * * * * * * ! ! * * * * * * * * * * ! ! * * * * * * * * * * ! ! * * * * * * * * * * ! ! * * * * * * * * * * ! ! * * * * * * * * * * ! ! * * * * * * * * * * ! ! * * * * * * * * * * ! ! * * * * * * * * * * ! ! * * * * * * * * * * ! ! * * * * * * * * * * ! ! * * * * * * * * * * ! ! * * * * * * * * * * ! ! * * * * * * * * * * ! ! * * * * * * * * * * ! ! * * * * * * * * * * ! ! * * * * * * * * * * ! ! * * * * * * * * * * ! ! * * * * * * * * * * ! ! * * * * * * * * * * ! ! * * * * * * * * * * ! ! * * * * * * * * * * ! ! * * * * * * * * * * ! ! * * * * * * * * * * ! ! * * * * * * * * * * ! ! * * * * * * * * * * ! ! * * * * * * * * * * ! ! * * * * * * * * * * ! ! * * * * * * * * * * ! ! * * * * * * * * * * ! ! * * * * * * * * * * ! ! * * * * * * * * * * ! ! * * * * * * * * * * ! ! * * * * * * * * * * ! ! * * * * * * * * * * ! ! * * * * * * * * * * ! ! * * * * * * * * * * ! ! * * * * * * * * * * ! ! * * * * * * * * * * ! ! * * * * * * * * * * ! ! * * * * * * * * * * ! ! * * * * * * * * * * ! ! * * * * * * * * * * ! ! * * * * * * * * * * ! ! * * * * * * * * * * ! ! * * * * * * * * * * ! ! * * * * * * * * * * ! ! * * * * * * * * * * ! ! * * * * * * * * * * ! ! * * * * * * * * * * ! ! * * * * * * * * * * ! ! * * * * * * * * * * ! ! * * * * * * * * * * ! ! * * * * * * * * * * ! ! * * * * * * * * * * ! ! * * * * * * * * * * ! ! * * * * * * * * * * ! ! * * * * * * * * * * ! ! * * * * * * * * * * ! ! * * * * * * * * * * ! ! * * * * * * * * * * ! ! * * * * * * * * * * ! ! * * * * * * * * * * ! ! * * * * * * * * * * ! ! * * * * * * * * * * ! ! * * * * * * * * * * ! ! * * * * * * * * * * ! ! * * * * * * * * * * ! ! * * * * * * * * * * ! ! * * * * * * * * * * ! ! * * * * * * * * * * ! ! * * * * * * * * * * ! ! * * * * * * * * * * ! ! * * * * * * * * * * ! ! * * * * * * * * * * ! ! * * * * * * * * * * ! ! * * * * * * * * * * ! ! * * * * * * * * * * ! ! * * * * * * * * * * ! ! * * * * * * * * * * ! ! * * * * * * * * * * ! ! * * * * * * * * * * ! ! * * * * * * * * * * ! ! * * * * * * * * * * ! ! * * * * * * * * * * ! ! * * * * * * * * * * ! ! * * * * * * * * * * ! ! * * * * * * * * * * ! ! * * * * * * * * * * ! ! * * * * * * * * * * ! ! * * * * * * * * * * ! ! * * * * * * * * * * ! ! * * * * * * * * * * ! ! * * * * * * * * * * ! ! * * * * * * * * * * ! ! * * * * * * * * * * ! ! * * * * * * * * * * ! ! * * * * * * * * * * ! ! * * * * * * * * * * ! ! * * * * * * * * * * ! ! * * * * * * * * * * ! ! * * * * * * * * * * ! ! * * * * * * * * * * ! ! * * * * * * * * * * ! ! * * * * * * * * * * ! ! * * * * * * * * * * ! ! * * * * * * * * * * ! ! * * * * * * * * * * ! ! * * * * * * * * * * ! ! * * * * * * * * * * ! ! * * * * * * * * * * ! ! * * * * * * * * * * ! ! * * * * * * * * * * ! ! * * * * * * * * * * ! ! * * * * * * * * * * ! ! * * * * * * * * * * ! ! * * * * * * * * * * ! ! * * * * * * * * * * ! ! * * * * * * * * * * ! ! * * * * * * * * * * ! ! * * * * * * * * * * ! ! * * * * * * * * * * ! ! * * * * * * * * * * ! ! * * * * * * * * * * ! ! * * * * * * * * * * ! ! * * * * * * * * * * ! ! * * * * * * * * * * ! ! * * * * * * * * * * ! ! * * * * * * * * * * ! ! * * * * * * * * * * ! ! * * * * * * * * * * ! ! * * * * * * * * * * ! ! * * * * * * * * * * ! ! * * * * * * * * * * ! ! * * * * * * * * * * ! ! * * * * * * * * * * ! ! * * * * * * * * * * ! ! * * * * * * * * * * ! ! * * * * * * * * * * ! ! * * * * * * * * * * ! ! * * * * * * * * * * ! ! * * * * * * * * * * ! ! * * * * * * * * * * ! ! * * * * * * * * * * ! ! * * * * * * * * * * ! ! * * * * * * * * * * ! ! * * * * * * * * * * ! ! * * * * * * * * * * ! ! * * * * * * * * * * ! ! * * * * * * * * * * ! ! * * * * * * * * * * ! ! * * * * * * * * * * ! ! * * * * * * * * * * ! ! * * * * * * * * * * ! ! * * * * * * * * * * ! ! * * * * * * * * * * ! ! * * * * * * * * * * ! ! * * * * * * * * * * ! ! * * * * * * * * * * ! ! * * * * * * * * * * ! ! * * * * * * * * * * ! ! * * * * * * * * * * ! ! * * * * * * * * * * ! ! * * * * * * * * * * ! ! * * * * * * * * * * ! ! * * * * * * * * * * ! ! * * * * * * * * * * ! ! * * * * * * * * * * ! ! * * * * * * * * * * ! ! * * * * * * * * * * ! ! * * * * * * * * * * ! ! * * * * * * * * * * ! ! * * * * * * * * * * ! ! * * * * * * * * * * ! ! * * * * * * * * * * ! ! * * * * * * * * * * ! ! * * * * * * * * * * ! ! * * * * * * * * * * ! ! * * * * * * * * * * ! ! * * * * * * * * * * ! ! * * * * * * * * * * ! ! * * * * * * * * * * ! ! * * * * * * * * * * ! ! * * * * * * * * * * ! ! * * * * * * * * * * ! ! * * * * * * * * * * ! ! * * * * * * * * * * ! ! * * * * * * * * * * ! ! * * * * * * * * * * ! ! * * * * * * * * * * ! ! * * * * * * * * * * ! ! * * * * * * * * * * ! ! * * * * * * * * * * ! ! * * * * * * * * * * ! ! * * * * * * * * * * ! ! * * * * * * * * * * ! ! * * * * * * * * * * ! ! * * * * * * * * * * ! ! * * * * * * * * * * ! ! * * * * * * * * * * ! ! * * * * * * * * * * ! ! * * * * * * * * * * ! ! * * * * * * * * * * ! ! * * * * * * * * * * ! ! * * * * * * * * * * ! ! * * * * * * * * * * ! ! * * * * * * * * * * ! ! * * * * * * * * * * ! ! * * * * * * * * * * ! ! * * * * * * * * * * ! ! * * * * * * * * * * ! ! * * * * * * * * * * ! ! * * * * * * * * * * ! ! * * * * * * * * * * ! ! * * * * * * * * * * ! ! * * * * * * * * * * ! ! * * * * * * * * * * ! ! * * * * * * * * * * ! ! * * * * * * * * * * ! ! * * * * * * * * * * ! ! * * * * * * * * * * ! ! * * * * * * * * * * ! ! * * * * * * * * * * ! ! * * * * * * * * * * ! ! * * * * * * * * * * ! ! * * * * * * * * * * ! ! * * * * * * * * * * ! ! * * * * * * * * * * ! ! * * * * * * * * * * ! ! * * * * * * * * * * ! ! * * * * * * * * * * ! ! * * * * * * * * * * ! ! * * * * * * * * * * ! ! * * * * * * * * * * ! ! * * * * * * * * * * ! ! * * * * * * * * * * ! ! * * * * * * * * * * ! ! * * * * * * * * * * ! ! * * * * * * * * * * ! ! * * * * * * * * * * ! ! * * * * * * * * * * ! ! * * * * * * * * * * ! ! * * * * * * * * * * ! ! * * * * * * * * * * ! ! * * * * * * * * * * ! ! * * * * * * * * * * ! ! * * * * * * * * * * ! ! * * * * * * * * * * ! ! * * * * * * * * * * ! ! * * * * * * * * * * ! ! * * * * * * * * * * ! ! * * * * * * * * * * ! ! * * * * * * * * * * ! ! * * * * * * * * * * ! ! * * * * * * * * * * ! ! * * * * * * * * * * ! ! * * * * * * * * * * ! ! * * * * * * * * * * ! ! * * * * * * * * * * ! ! * * * * * * * * * * ! ! * * * * * * * * * * ! ! * * * * * * * * * * ! ! * * * * * * * * * * ! ! * * * * * * * * * * ! ! * * * * * * * * * * ! ! * * * * * * * * * * ! ! * * * * * * * * * * ! ! * * * * * * * * * * ! ! * * * * * * * * * * ! ! * * * * * * * * * * ! ! * * * * * * * * * * ! ! * * * * * * * * * * ! ! * * * * * * * * * * ! ! * * * * * * * * * * ! ! * * * * * * * * * * ! ! * * * * * * * * * * ! ! * * * * * * * * * * ! ! * * * * * * * * * * ! ! * * * * * * * * * * ! ! * * * * * * * * * * ! ! * * * * * * * * * * ! ! * * * * * * * * * * ! ! * * * * * * * * * * ! ! * * * * * * * * * * ! ! * * * * * * * * * * ! ! * * * * * * * * * * ! ! * * * * * * * * * * ! ! * * * * * * * * * * ! ! * * * * * * * * * * ! ! * * * * * * * * * * ! ! * * * * * * * * * * ! ! * * * * * * * * * * ! ! * * * * * * * * * * ! ! * * * * * * * * * * ! ! * * * * * * * * * * ! ! * * * * * * * * * * ! ! * * * * * * * * * * ! ! * * * * * * * * * * ! ! * * * * * * * * * * ! ! * * * * * * * * * * ! ! * * * * * * * * * * ! ! * * * * * * * * * * ! ! * * * * * * * * * * ! ! * * * * * * * * * * ! ! * * * * * * * * * * ! ! * * * * * * * * * * ! ! * * * * * * * * * * ! ! * * * * * * * * * * ! ! * * * * * * * * * * ! ! * * * * * * * * * * ! ! * * * * * * * * * * ! ! * * * * * * * * * * ! ! * * * * * * * * * * ! ! * * * * * * * * * * ! ! * * * * * * * * * * ! ! * * * * * * * * * * ! ! * * * * * * * * * * ! ! * * * * * * * * * * ! ! * * * * * * * * * * ! ! * * * * * * * * * * ! ! * * * * * * * * * * ! ! * * * * * * * * * * ! ! * * * * * * * * * * ! ! * * * * * * * * * * ! ! * * * * * * * * * * ! ! * * * * * * * * * * ! ! * * * * * * * * * * ! ! * * * * * * * * * * ! ! * * * * * * * * * * ! ! * * * * * * * * * * ! ! * * * * * * * * * * ! ! * * * * * * * * * * ! ! * * * * * * * * * * ! ! * * * * * * * * * * ! ! * * * * * * * * * * ! ! * * * * * * * * * * ! ! * * * * * * * * * * ! ! * * * * * * * * * * ! ! * * * * * * * * * * ! ! * * * * * * * * * * ! ! * * * * * * * * * * ! ! * * * * * * * * * * ! ! * * * * * * * * * * ! ! * * * * * * * * * * ! ! * * * * * * * * * * ! ! * * * * * * * * * * ! ! * * * * * * * * * * ! ! * * * * * * * * * * ! ! * * * * * * * * * * ! ! * * * * * * * * * * ! ! * * * * * * * * * * ! ! * * * * * * * * * * ! ! * * * * * * * * * * ! ! * * * * * * * * * * ! ! * * * * * * * * * * ! ! * * * * * * * * * * ! ! * * * * * * * * * * ! ! * * * * * * * * * * ! ! * * * * * * * * * * ! ! * * * * * * * * * * ! ! * * * * * * * * * * ! ! * * * * * * * * * * ! ! * * * * * * * * * * ! ! * * * * * * * * * * ! ! * * * * * * * * * * ! ! * * * * * * * * * * ! ! * * * * * * * * * * ! ! * * * * * * * * * * ! ! * * * * * * * * * * ! ! * * * * * * * * * * ! ! * * * * * * * * * * ! ! * * * * * * * * * * ! ! * * * * * * * * * * ! ! * * * * * * * * * * ! ! * * * * * * * * * * ! ! * * * * * * * * * * ! ! * * * * * * * * * * ! ! * * * * * * * * * * ! ! * * * * * * * * * * ! ! * * * * * * * * * * ! ! * * * * * * * * * * ! ! * * * * * * * * * * ! ! * * * * * * * * * * ! ! * * * * * * * * * * ! ! * * * * * * * * * * ! ! * * * * * * * * * * ! ! * * * * * * * * * * ! ! * * * * * * * * * * ! ! * * * * * * * * * * ! ! * * * * * * * * * * ! ! * * * * * * * * * * ! ! * * * * * * * * * * ! ! * * * * * * * * * * ! ! * * * * * * * * * * ! ! * * * * * * * * * * ! ! * * * * * * * * * * ! ! * * * * * * * * * * ! ! * * * * * * * * * * ! ! * * * * * * * * * * ! ! * * * * * * * * * * ! ! * * * * * * * * * * ! ! * * * * * * * * * * ! ! * * * * * * * * * * ! ! * * * * * * * * * * ! ! * * * * * * * * * * ! ! * * * * * * * * * * ! ! * * * * * * * * * * ! ! * * * * * * * * * * ! ! * * * * * * * * * * ! ! * * * * * * * * * * ! ! * * * * * * * * * * ! ! * * * * * * * * * * ! ! * * * * * * * * * * ! ! * * * * * * * * * * ! ! * * * * * * * * * * ! ! * * * * * * * * * * ! ! * * * * * * * * * * ! ! * * * * * * * * * * ! ! * * * * * * * * * * ! ! * * * * * * * * * * ! ! * * * * * * * * * * ! ! * * * * * * * * * * ! ! * * * * * * * * * * ! ! * * * * * * * * * * ! ! * * * * * * * * * * ! ! * * * * * * * * * * ! ! * * * * * * * * * * ! ! * * * * * * * * * * ! ! * * * * * * * * * * ! ! * * * * * * * * * * ! ! * * * * * * * * * * ! ! * * * * * * * * * * ! ! * * * * * * * * * * ! ! * * * * * * * * * * ! ! * * * * * * * * * * ! ! * * * * * * * * * * ! ! * * * * * * * * * * ! ! * * * * * * * * * * ! ! * * * * * * * * * * ! ! * * * * * * * * * * ! ! * * * * * * * * * * ! ! * * * * * * * * * * ! ! * * * * * * * * * * ! ! * * * * * * * * * * ! ! * * * * * * * * * * ! ! * * * * * * * * * * ! ! * * * * * * * * * * ! ! * * * * * * * * * * ! ! * * * * * * * * * * ! ! * * * * * * * * * * ! ! * * * * * * * * * * ! ! * * * * * * * * * * ! ! * * * * * * * * * * ! ! * * * * * * * * * * ! ! * * * * * * * * * * ! ! * * * * * * * * * * ! ! * * * * * * * * * * ! ! * * * * * * * * * * ! ! * * * * * * * * * * ! ! * * * * * * * * * * ! ! * * * * * * * * * * ! ! * * * * * * * * * * ! ! * * * * * * * * * * ! ! * * * * * * * * * * ! ! * * * * * * * * * * ! ! * * * * * * * * * * ! ! * * * * * * * * * * ! ! * * * * * * * * * * ! ! * * * * * * * * * * ! ! * * * * * * * * * * ! ! * * * * * * * * * * ! ! * * * * * * * * * * ! ! * * * * * * * * * * ! ! * * * * * * * * * * ! ! * * * * * * * * * * ! ! * * * * * * * * * * ! ! * * * * * * * * * * ! ! * * * * * * * * * * ! ! * * * * * * * * * * ! ! * * * * * * * * * * ! ! * * * * * * * * * * ! ! * * * * * * * * * * ! ! * * * * * * * * * * ! ! * * * * * * * * * * ! ! * * * * * * * * * * ! ! * * * * * * * * * * ! ! * * * * * * * * * * ! ! * * * * * * * * * * ! ! * * * * * * * * * * ! ! * * * * * * * * * * ! ! * * * * * * * * * * ! ! * * * * * * * * * * ! ! * * * * * * * * * * ! ! * * * * * * * * * * ! ! * * * * * * * * * * ! ! * * * * * * * * * * ! ! * * * * * * * * * * ! ! * * * * * * * * * * ! ! * * * * * * * * * * ! ! * * * * * * * * * * ! ! * * * * * * * * * * ! ! * * * * * * * * * * ! ! * * * * * * * * * * ! ! * * * * * * * * * * ! ! * * * * * * * * * * ! ! * * * * * * * * * * ! ! * * * * * * * * * * ! ! * * * * * * * * * * ! ! * * * * * * * * * * ! ! * * * * * * * * * * ! ! * * * * * * * * * * ! ! * * * * * * * * * * ! ! * * * * * * * * * * ! ! * * * * * * * * * * ! ! * * * * * * * * * * ! ! * * * * * * * * * * ! ! * * * * * * * * * * ! ! * * * * * * * * * * ! ! * * * * * * * * * * ! ! * * * * * * * * * * ! ! * * * * * * * * * * ! ! * * * * * * * * * * ! ! * * * * * * * * * * ! ! * * * * * * * * * * ! ! * * * * * * * * * * ! ! * * * * * * * * * * ! ! * * * * * * * * * * ! ! * * * * * * * * * * ! ! * * * * * * * * * * ! ! * * * * * * * * * * ! ! * * * * * * |     |     |     |     |     |     |     |     |     |     |     |     |     |  |

|               |                                          |                                                                                |                                       |                                  |                                  |                                        |     |     |   |     |     |     |     |     |     |     |
|---------------|------------------------------------------|--------------------------------------------------------------------------------|---------------------------------------|----------------------------------|----------------------------------|----------------------------------------|-----|-----|---|-----|-----|-----|-----|-----|-----|-----|
|               | 190                                      | 195                                                                            | 200                                   | 205                              | 210                              | 215                                    | 220 | 225 |   | 230 | 235 | 240 | 245 | 250 | 255 | 260 |
| conservation  | **                                       | *                                                                              | **                                    | *                                | *                                | *                                      | *   | *   | * | *   | *   | *   | *   | *   | *   | *   |
| SPARCI1`CI    | ...                                      | GAGGACATGAGTGAAGAGAAGGAAAGCCATGTGGAG                                           | ...                                   | ATGAAGCAAGCGGGGCCAAGAGCTTGAAGGTT | CAGA                             | 263                                    |     |     |   |     |     |     |     |     |     |     |
| SPARCI1`DR    | ...                                      | GAAGACACGAGCGAGGAGACTGAGAGCCGTGTGGAG                                           | ...                                   | ATGAACCAAGCGGAGGCAAGAGGCTGAAGGTT | CAGA                             | 269                                    |     |     |   |     |     |     |     |     |     |     |
| SPARCI1`IP    | GAC                                      | GAGGACGCAAGCAAGGAGACATCAAATGGTGGAGAAGGAACAGATGAAGTATATTCACTAGATTGTGGAGATGTCTGC | 287                                   |                                  |                                  |                                        |     |     |   |     |     |     |     |     |     |     |
| SPARCI1`LW    | ...                                      | GAGGACATGAGTGAAGAGAAGGAAAGCCATGTGGAG                                           | ...                                   | ATGAAGCAAGCGGGGCCAAGAGCTTGAAGGTT | CAGA                             | 263                                    |     |     |   |     |     |     |     |     |     |     |
| SPARCI1`PN    | GAT                                      | GAAGAT                                                                         | ...                                   | GTGAAG                           | ...                              | TCAGAGGAGGTGAACACAGGTACTCTGAAGGCATCTGA | 257 |     |   |     |     |     |     |     |     |     |
| SPARCI1`PP    | ...                                      | GAAGACACGAGTGAAGAGAAGGAAAGCCTTGTGGAG                                           | ...                                   | GTGAAGCAAGTGGGGCCAAGAGCTTGAAGGTT | CAGA                             | 272                                    |     |     |   |     |     |     |     |     |     |     |
| SPARCI1-AM    | GACGAG                                   | ...                                                                            | GCCAGCCAGCGGACAGTTCTGA                | 269                              |                                  |                                        |     |     |   |     |     |     |     |     |     |     |
| SPARCI1-C1`CC | GATGAGGACAAAGAGAGAAGAGAATGAGAGCCGTGTGGAA | ...                                                                            | ATGAAGCAAGCAGAGGCAAGAGGCTTGAAGTTT     | CAGA                             | 278                              |                                        |     |     |   |     |     |     |     |     |     |     |
| SPARCI1-C2`CC | GACGAAGACATGAGTGAGGAGAATGAGAGCCGTGTGAAG  | ...                                                                            | ATGAAGCAAGCAGGGGCCAAGAGCTTGAAGGTTCTGG | 278                              |                                  |                                        |     |     |   |     |     |     |     |     |     |     |
| SPARCI1-C1`SG | GATGAGGACAAAGAGTGAGGAGAATGAGAGTCGTGTGGAG | ...                                                                            | ATGAAGCAAGCTGGGGCCAAGAGCTTGAAGGCT     | CAGA                             | 278                              |                                        |     |     |   |     |     |     |     |     |     |     |
| SPARCI1-C2`SG | GATGAAGACATGAGTGAGGAGAATGAGAGCCGTGTGGAG  | ...                                                                            | ATGAAGCAAGTAGGGGCCAAGAGCTTGAAGGTT     | CAGA                             | 278                              |                                        |     |     |   |     |     |     |     |     |     |     |
| SPARCI1-C1`SA | GATGAGGACAAAGAGTGAGGAGAATGAGAGCCGTGTGGAG | ...                                                                            | ATGAAGCAAGCAGGGGCCAAGAGCTTGAAGGCT     | CAGA                             | 278                              |                                        |     |     |   |     |     |     |     |     |     |     |
| SPARCI1-C2`SA | GATGAAGACATGAGTGAGGAGAATGAGAGCCGTGTGGAG  | ...                                                                            | ATGAAGCAAGCAGGGCCAAGAGCTTGAAGGTT      | CAGA                             | 278                              |                                        |     |     |   |     |     |     |     |     |     |     |
| SPARCI1-C1`SR | GATGAGGAC                                | ...                                                                            | CGTGTGGAG                             | ...                              | ATGAAGCAAGCAGGGCCAAGAGCTTGAAGGCT | CAGA                                   | 257 |     |   |     |     |     |     |     |     |     |
| SPARCI1-C2`SR | ...                                      | ...                                                                            | TCAGGGCCAGAAGCTGAAGGTT                | CAGA                             | 221                              |                                        |     |     |   |     |     |     |     |     |     |     |

|               |                                                                  |                                      |       |       |     |     |     |     |     |     |        |      |     |     |     |     |
|---------------|------------------------------------------------------------------|--------------------------------------|-------|-------|-----|-----|-----|-----|-----|-----|--------|------|-----|-----|-----|-----|
|               | 265                                                              | 270                                  | 275   | 280   | 285 | 290 | 295 | 300 | 305 | 310 | 315    | 320  | 325 | 330 | 335 | 340 |
| conservation  | *!*!*!*!                                                         | *!*!                                 | ***** | ***** | !!* | !!* | !!* | !!* | !!* | !!* | *!*!*! | *!*! |     |     |     |     |
| SPARCI1`CI    | GGAAGGTGATAAGAATACACCTTTGCTCCTGAGTGAGGAGGCAC                     | TGACTCAGCTCCTGCAGGTCTCTGAGGAGGCAGAGG |       |       |     |     |     |     |     |     |        |      |     |     |     | 343 |
| SPARCI1`DR    | TGGAGGTGAAAAGAAGGAACCTTTACTCCTGAGTGATGAGGCATTGACTCAGCTCCTGC      | AAGAACCCGTG                          |       |       |     |     |     |     |     |     |        |      |     |     |     | 339 |
| SPARCI1`IP    | TGAAGATGGCAGGAGCATTCTGTGCTGCTGAGTGAAGAGATGCTGGCTCAACTTATAAAG     |                                      |       |       |     |     |     |     |     |     |        |      |     |     |     | 348 |
| SPARCI1`LW    | GGGAGGTGAGAAATAACACCTTTGCTCCTGAGTGAGGAGGCAC                      | TGACTCAACTCCTGCAGGTCTTGAGGGGGCGAAACT |       |       |     |     |     |     |     |     |        |      |     |     |     | 342 |
| SPARCI1`PN    | TGGAGATGCGAGGAACATTCTGTACTTCTAAGTGAAGAGGCAC                      | TCACTAAACTCCTTCAAGCTTCTGAA           |       |       |     |     |     |     |     |     |        |      |     |     |     | 327 |
| SPARCI1`PP    | GGGTGGTGAGAAGAATACACCTTTGCTCCTGAGTGAGGAGGCAC                     | TGACTCAACTCCTGCAGGTCTCAGAGGAG        |       |       |     |     |     |     |     |     |        |      |     |     |     | 345 |
| SPARCI1-AM    | TGGAGATGAGAGGGCCACCTTGTCTCTGAGTGAAGAAGCTCTCACTAAACTCCTTCAGGCTTCT |                                      |       |       |     |     |     |     |     |     |        |      |     |     |     | 336 |
| SPARCI1-C1`CC | GGAAGGTGAGAAGAATACACCTTTGCTCCTGAGTGAGGAGGCAC                     | TGTCTCAGCTCCTACAGGTCCCC              |       |       |     |     |     |     |     |     |        |      |     |     |     | 345 |
| SPARCI1-C2`CC | GGAAGGTGAGAAGAATACACCATTTGCTCCTGAGTGAGGAGGCAC                    | TGACTCAGATCCTGCAGGTTTCATGAG          |       |       |     |     |     |     |     |     |        |      |     |     |     | 348 |
| SPARCI1-C1`SG | GGAAGGTGAGAAGAATACACCTTTGCTCCTGAGTGAGGAGGCAC                     | TGTCTCAACTCCTACAG                    |       |       |     |     |     |     |     |     |        |      |     |     |     | 339 |
| SPARCI1-C2`SG | GGAAGGTGAGAAGAATACACCATTTGCTCCTGAGTGACGAGGCAC                    | TGACTCAGCTCCTGCAG                    |       |       |     |     |     |     |     |     |        |      |     |     |     | 339 |
| SPARCI1-C1`SA | GGAAGGTGAGAAGAATACACCTTTGCTCCTGAGTGAGGAGGCAC                     | TGTCTCAACTCCTACAG                    |       |       |     |     |     |     |     |     |        |      |     |     |     | 339 |
| SPARCI1-C2`SA | GGAAGGTGAGAAGAATACACCATTTGCTCCTGAGTGACGAGGCAC                    | TGACTCAGCTCCTGCAG                    |       |       |     |     |     |     |     |     |        |      |     |     |     | 339 |
| SPARCI1-C1`SR | GGAAGGTGAGAAGAATACACCTTTGCTCCTGAGTGAGGAGGCAC                     | TGTCTCAACTCCTACAG                    |       |       |     |     |     |     |     |     |        |      |     |     |     | 318 |
| SPARCI1-C2`SR | GGAAGGTGAGAAGAATACACCATTTGCTCCTGAGTGACGAGGCAC                    | TGACTCAGCTCCTGCAGGTCCCTGAGGAGGTAGATG |       |       |     |     |     |     |     |     |        |      |     |     |     | 301 |

|               |          |        |         |         |         |          |              |              |              |           |           |        |        |        |     |     |
|---------------|----------|--------|---------|---------|---------|----------|--------------|--------------|--------------|-----------|-----------|--------|--------|--------|-----|-----|
| conservation  | 345      | 350    | 355     | 360     | 365     | 370      | 375          | 380          | 385          | 390       | 395       | 400    | 405    | 410    | 415 |     |
| SPARCI1`CI    | AAATT... | GTGGAG | GAG     | GAT     | GAAGAT  | GATAAT   | GACGGT       | CAG          | AAAAAGACAAAG | AAGTT     | AAGGAGATG | ...    | GAG    | GAGGAG |     | 417 |
| SPARCI1`DR    | .....    | GAGGAG | GAT     | GAAGAT  | GATCATT | CTGAGA   | GTCTGG       | GAG          | AAAGATGAAG   | TGATG     | GACAAGGTG | .....  | GAG    | CAG    |     | 405 |
| SPARCI1`IP    | .....    | GATTCT | GAGGA   | AGAGC   | AGCAT   | GATG     | TGTGG        | GAG          | AAAGATGAGG   | AAAGAT    | GTT.....  | GAT    | GAAGAT |        |     | 405 |
| SPARCI1`LW    | .....    | ATGGAG | GAG     | GAT     | GAAGGT  | GATGAT   | GACGTC       | CAG          | AAAAAGACAAAG | AAGTT     | AAGGAGAT  | TGAG   | GAG    | GAGGAG |     | 414 |
| SPARCI1`PN    | .....    | GAGGA  | ACAGC   | AGATCAT | GAGGA   | AGACAAAG | AAGATG       | AGG          | ACATAGG      | AGAAGG    | AGGAGGA   | GAT    | GAATCT |        |     | 393 |
| SPARCI1`PP    | .....    | GCAGAT | GAAACT  | TATGGAG | GAGGAT  | GAAGGT   | CAG          | AAAAAGACAAAG | AAGTT        | AAGGAGA   | CTGAG     | GAG    | GAGGAG |        |     | 417 |
| SPARCI1-AM    | .....    | GAGGAT | GAACAGC | AGCAGG  | CTGTGG  | AAGAAG   | ACAAAG       | AAGATGAAG    | ATGAAG       | TGAAG     | GAAGAA    | GAAGAA |        |        |     | 399 |
| SPARCI1-C1`CC | .....    | GAGGAG | GAAGAT  | GATGAT  | GATAGTT | CA       | AAAAAGACAAAG | AAATG        | AAGGAGATG    | ...       | GAG       | GAGGAG |        |        |     | 405 |
| SPARCI1-C2`CC | .....    | GTGGTA | GAT     | GAACCT  | GTTGAG  | GAGGAT   | GAAAGAT      | GATGAT       | GACAAAG      | AAATG     | AAGGAGATG | ...    | GAG    | GAGGAG |     | 417 |
| SPARCI1-C1`SG | .....    | GAGGAT | GAAGAT  | GATGAT  | GATAGTT | CA       | AAAAAGACAAAG | AAATG        | AAGGAGATG    | ...       | GAG       | GAGGAG |        |        |     | 399 |
| SPARCI1-C2`SG | .....    | GAGGAT | GAAGAT  | GATGAT  | GATGAT  | GACGTC   | CAG          | AAAAAGACAAAG | AAACG        | AAGGAGATG | ...       | CAG    | GAAGAG |        |     | 405 |
| SPARCI1-C1`SA | .....    | GAGGAT | GAAGAT  | GATGAT  | GATAGTT | CA       | AAAAAGACAAAG | AAATG        | AAGGAGATG    | ...       | GAG       | GAGGAG |        |        |     | 399 |
| SPARCI1-C2`SA | .....    | GAGGAT | GTA     | GATGAT  | GATGAT  | GATGAT   | GACGTC       | CAG          | AAAAAGACAAAG | AAACG     | AAGGAGATG | ...    | CAG    | GAGGAG |     | 408 |
| SPARCI1-C1`SR | .....    | GAGGAT | GAAGAT  | GATGAT  | GATAGTT | CA       | AAAAAGACAAAG | AAATG        | AAGGAGATG    | ...       | GAG       | GAGGAG |        |        |     | 378 |
| SPARCI1-C2`SR | AACCTGT  | GAGGAG | GAA     | GAAGAT  | GATGAT  | GATGAT   | GACGTC       | CAG          | AAAAAGACAAAG | AAACG     | AAGGAGATG | ...    | CAG    | GGGAG  |     | 378 |

|               |        |        |        |        |         |         |          |          |           |          |           |       |       |        |        |        |
|---------------|--------|--------|--------|--------|---------|---------|----------|----------|-----------|----------|-----------|-------|-------|--------|--------|--------|
| conservation  | 420    | 425    | 430    | 435    | 440     | 445     | 450      | 455      | 460       | 465      | 470       | 475   |       |        |        |        |
| SPARCI1`CI    | .....  | GGGAAG | GAAAA  | TGAAGA | ATCTACA | ATGGAGA | ATGAAGAT | GAAATT   | TGAGAAG   | GAGCGAAG | GGT...    | GA    |       |        |        | 479    |
| SPARCI1`DR    | .....  | TCAAC  | CAGAA  | AGATGG | GAGAAT  | CCAAA   | CCGAGACT | GAAAAC   | CGAGGCT   | GAGAGCA  | AGGAA     | ..... | GA    |        |        | 464    |
| SPARCI1`IP    | .....  | GGCGT  | AGGAAA | AGTAG  | CGGAT   | ATGAAT  | GAGGAG   | AAAGACC  | AGCAAG    | AGCAGCT  | AAAA      | GAGAA | AGATT | TGA    |        | 479    |
| SPARCI1`LW    | .....  | GGAAAG | GAATAT | CGAGA  | ATCTACA | ATGAGA  | ATGAAGAT | GTA      | ACTGAG... | AGTGAAG  | GT        | ..... | GA    |        |        | 473    |
| SPARCI1`PN    | .....  | AAAA   | CAGGG  | GATGG  | AAAAAGG | AGCAGCA | AAGGAAC  | AGCAGC   | AGCAAAA   | GGGGAG   | A.....    | GT    |       |        |        | 449    |
| SPARCI1`PP    | .....  | GGAAAG | GAAAA  | GGGAGA | ATCTACA | ATGGAGA | ATGAAGAT | GTA      | ACTGAGAA  | GAGTGAAG | GT        | ..... | GA    |        |        | 479    |
| SPARCI1-AM    | GAAAGA | GAATT  | GAGGA  | ACCGA  | AGGAAG  | AGATCAG | AGAGGA   | ATCTA    | AGGTTA    | TGGTG    | GAGGAG    | GAA   | CAAAA | ...    | GA     | 476    |
| SPARCI1-C1`CC | .....  | GGAAAG | AAAAG  | ATGG   | GAGAAT  | CTACG   | ATGAAGA  | ATGAAGAT | GGA       | ACTGAAAA | AAAGAAAT  | GGT   | GAGAA | AGAT   | GTA    | GA 479 |
| SPARCI1-C2`CC | .....  | GGAAAG | AAAAT  | ATGG   | GAGAAT  | CTATAA  | CAAGA    | ACGAAGAT | GGA       | ACTGAAAA | AAAGGAAGG | GGG   | GAG   | ACA    | AGGTAG | GA 491 |
| SPARCI1-C1`SG | .....  | GGAAAG | AAAAG  | ATGG   | GAGAAT  | CTACA   | ATGAAGA  | ACGAAGAT | GGA       | ACTGAAAA | AAAGGAAGG | TGAG  | ACA   | AGGTAG |        | 473    |
| SPARCI1-C2`SG | .....  | GGAAAG | AAAAG  | ATGG   | GAGAAT  | CTACA   | ATGAAGA  | ACGAAGAT | GGA       | ACTGAAAA | AAAGGAAGG | TGAG  | ACA   | AGGTAG |        | 476    |
| SPARCI1-C1`SA | .....  | GGAAAG | AAAAG  | ATGG   | GAGAAT  | CTACA   | ATGAAGA  | ACGAAGAT | GGA       | ACTGAAAA | AAAGGAAGG | TGAG  | ACA   | AGGTAG |        | 473    |
| SPARCI1-C2`SA | .....  | GGAAAG | AAAAG  | ATGG   | GAGAAT  | CTACA   | ATGAAGA  | ACGAAGAT | GGA       | ACTGAAAA | AAAGGAAGG | TGAG  | ACA   | AGGTAG |        | 482    |
| SPARCI1-C1`SR | .....  | GGAAAG | AAAAG  | ATGG   | GAGAAT  | CTACA   | ATGAAGA  | ACGAAGAT | GGA       | ACTGAAAA | AAAGGAAGG | TGAG  | ACA   | AGGTAG |        | 452    |
| SPARCI1-C2`SR | .....  | GGAAAG | AAAGAT | GG     | GAGAAT  | CTACA   | ATGAAGAA | CAAGAT   | GGA       | ACTGAAAA | AAAGGAAGG | TGAG  | ACA   | AGGTAG |        | 452    |

|               |                                                                                    |     |     |     |     |     |     |     |     |     |     |     |     |     |     |     |  |
|---------------|------------------------------------------------------------------------------------|-----|-----|-----|-----|-----|-----|-----|-----|-----|-----|-----|-----|-----|-----|-----|--|
| conservation  | 480                                                                                | 485 | 490 | 495 | 500 | 505 | 510 | 515 | 520 | 525 | 530 | 535 | 540 | 545 | 550 | 555 |  |
| SPARCI1`CI    | GGATGCAAAGGAGACTGACAGCAGTACTGATTCAGAGATACCAATGGATTGGACTATGCAGCTGACCGTGATGCTTCA.    | 558 |     |     |     |     |     |     |     |     |     |     |     |     |     |     |  |
| SPARCI1`DR    | GGATTCAAAGGACACAGACAGCAGTACTGAGTCAGAGATACCAATGGATTGGACTACACAAGCTGACAGAGATGCTTCT.   | 543 |     |     |     |     |     |     |     |     |     |     |     |     |     |     |  |
| SPARCI1`IP    | AGAA...GAGGAGGTAGGGAGTAGCACAGACTCGGAAATACCAGTAGATTTAGATTATTCTGCTGACAGTGTCTCTATA.   | 555 |     |     |     |     |     |     |     |     |     |     |     |     |     |     |  |
| SPARCI1`LW    | GGATGCAAAGGAGACTGACAGCAGTACTGAGTCAGAAATACCAATGGATTGGACTATGCAGCTGACCGTGATGCGTCA.    | 552 |     |     |     |     |     |     |     |     |     |     |     |     |     |     |  |
| SPARCI1`PN    | AGAAGTGGAGGAAGCTGGGAGTAGCACAGATTCAGAGATACCAATGGCTTTAGACTATGCTGCTGACAGTGAGACTATA.   | 528 |     |     |     |     |     |     |     |     |     |     |     |     |     |     |  |
| SPARCI1`PP    | GGATGCAAATGAAACTGACAGCAGTACTGAGTCAGAAATACCAATGGGTTTGGTCTATGCAGCTGATCGCGATGCGTCT.   | 558 |     |     |     |     |     |     |     |     |     |     |     |     |     |     |  |
| SPARCI1-AM    | GGTGTGGAGGAGCTGGGAAGCAGCAGAGACTCCGAGATACCAAGTAGATCTGGACTATGCTGCTGATGGAGAAGCTGGTG   | 556 |     |     |     |     |     |     |     |     |     |     |     |     |     |     |  |
| SPARCI1-C1`CC | GGATGCAAAATGAGACCGACAGCAGTACTGAGTCAGAGATCCCAATTGATTGGACTATGCAGCTGACCGTGATGCTTCA.   | 558 |     |     |     |     |     |     |     |     |     |     |     |     |     |     |  |
| SPARCI1-C2`CC | GGATGCAAAATGAGACTGACAGCAGTACTGAGGCAGAGTTACCAATGGATTTTGGACTATGCAGCTGATCGTGATGCTTCA. | 570 |     |     |     |     |     |     |     |     |     |     |     |     |     |     |  |
| SPARCI1-C1`SG | GGATGCAAAATGAGACCGACAGCAGTACTGAGTCAGAGATCCCAATTGATTTGGACTATGCAGCTGACCGTGAGGCTTCA.  | 552 |     |     |     |     |     |     |     |     |     |     |     |     |     |     |  |
| SPARCI1-C2`SG | GATTGCAAAATGAGACTGACAGCAGTACTGAAATCAGAGATACCAATGGATTGGACTATGCAGCTGACCGTGATGCTTCA.  | 555 |     |     |     |     |     |     |     |     |     |     |     |     |     |     |  |
| SPARCI1-C1`SA | GGATGCAAATGAGACCGACAGCAGTACTGAGTCAGAGATCCCAACTGATTTGGACTATGCAGCTGACCGTGAGGCTTCA.   | 552 |     |     |     |     |     |     |     |     |     |     |     |     |     |     |  |
| SPARCI1-C2`SA | GGATGCAAAATGAGACTGACAGTAGTACTGAATCAGAGATACCAATGGATTGGACTATGCAGCTGATCGTGATGCTTCA.   | 561 |     |     |     |     |     |     |     |     |     |     |     |     |     |     |  |
| SPARCI1-C1`SR | GGATGCAAAATGAGACCGACAGCAGTACTGAGTCAGAGATCCCAATTGATTGGACTATGCAGCTGACCGTGAGGCTTCA.   | 531 |     |     |     |     |     |     |     |     |     |     |     |     |     |     |  |
| SPARCI1-C2`SR | GGATGCAAAATGAGACTGACAGCAGTACTGAATCAGAAATACCAATTGATTTGGACTATGCAGCTGACCGTGATGCTTCA.  | 531 |     |     |     |     |     |     |     |     |     |     |     |     |     |     |  |

|              |  |                                                                                                                                                                                                                                                                                                                                                                                                                                                                                                                                                                                                                                                                                                                                                                                                                                                                                                                                                                                                                                                                                                                                                                                                                                                                                                                                                                                                                                                                                                                                                                                                                                                                                                                                                                                                                                                                                                                                                                                                                                                                                                                                                                                                                                                                                                                                                                                                                                                                                                                                                                                                                                                                                                                                                                                                                                                                                                                                                                                                                                                                                                                                                                                                                                                                                                                                                                                                                                                                                                                                                                                                                                                                                                                                                                                                                                                                                                                                                                                                                                                                                                                                                                                                                                                                                                                                                                                                                                                                                                                                                                                                                                                                                                                                                                                                                                                                                                                                                                                                                                                                                                                                                                                                                                                                                                                                                                                                                                                                                                                                                                                                                                                                                                                                                                                                                                                                                                                                                                                                                                                                                                                                                                                                                                                                                                                                                                                                                                                                                                                                                                                                                                                                                                                                                                                                                                                                                                                                                                                                                                                                                                                                                                                                                                                                                                                                                                                                                                                                                                                                                                                                                                                                                                                                                                                                                                                                                                                                                                                                                                                                                                                                                                                                                                                                                                                                                                                                                                                                                                                                                                                                                                                                                                                                                                                                                                                                                                                                                                                                                                                                                                                                                                                                                                                                                                                                                                                                                                                                                                                                                                                                                                                                                                                                                                                                                                                                                                                                                                                                                                                                                                                                                                                                                                                                                                                                                                                                                                                                                                                                                                                                                                                                                                                                                                                                                                                                                                                                                                                                                                                                                                                                                                                                                                                                                                                                                                                                                                                                                                                                                                                                                                                                                                                                                                                                                                                                                                                                                                                                                                                                                                                                                                                                                                                                                                                                                                                                                                                                                                                                                                                                                                                                                                                                                                                                                                                                                                                                                                                                                                                                                                                                                                                                                                                                                                                                                                                                                                                                                                                                                                                                                                                                                                                                                                                                                                                                                                                                                                                                                                                                                                                                                                                                                                                                                                                                                                                                                                                                                                                                                                                                                                                                                                                                                                                                                                                                                                                                                                                                                                                                                                                                                                                                                                                                                                                                                                                                                                                                                                                                                                                                                                                                                                                                                                                   |     |     |     |     |     |     |     |     |     |     |     |     |     |     |     |  |
|--------------|--|-----------------------------------------------------------------------------------------------------------------------------------------------------------------------------------------------------------------------------------------------------------------------------------------------------------------------------------------------------------------------------------------------------------------------------------------------------------------------------------------------------------------------------------------------------------------------------------------------------------------------------------------------------------------------------------------------------------------------------------------------------------------------------------------------------------------------------------------------------------------------------------------------------------------------------------------------------------------------------------------------------------------------------------------------------------------------------------------------------------------------------------------------------------------------------------------------------------------------------------------------------------------------------------------------------------------------------------------------------------------------------------------------------------------------------------------------------------------------------------------------------------------------------------------------------------------------------------------------------------------------------------------------------------------------------------------------------------------------------------------------------------------------------------------------------------------------------------------------------------------------------------------------------------------------------------------------------------------------------------------------------------------------------------------------------------------------------------------------------------------------------------------------------------------------------------------------------------------------------------------------------------------------------------------------------------------------------------------------------------------------------------------------------------------------------------------------------------------------------------------------------------------------------------------------------------------------------------------------------------------------------------------------------------------------------------------------------------------------------------------------------------------------------------------------------------------------------------------------------------------------------------------------------------------------------------------------------------------------------------------------------------------------------------------------------------------------------------------------------------------------------------------------------------------------------------------------------------------------------------------------------------------------------------------------------------------------------------------------------------------------------------------------------------------------------------------------------------------------------------------------------------------------------------------------------------------------------------------------------------------------------------------------------------------------------------------------------------------------------------------------------------------------------------------------------------------------------------------------------------------------------------------------------------------------------------------------------------------------------------------------------------------------------------------------------------------------------------------------------------------------------------------------------------------------------------------------------------------------------------------------------------------------------------------------------------------------------------------------------------------------------------------------------------------------------------------------------------------------------------------------------------------------------------------------------------------------------------------------------------------------------------------------------------------------------------------------------------------------------------------------------------------------------------------------------------------------------------------------------------------------------------------------------------------------------------------------------------------------------------------------------------------------------------------------------------------------------------------------------------------------------------------------------------------------------------------------------------------------------------------------------------------------------------------------------------------------------------------------------------------------------------------------------------------------------------------------------------------------------------------------------------------------------------------------------------------------------------------------------------------------------------------------------------------------------------------------------------------------------------------------------------------------------------------------------------------------------------------------------------------------------------------------------------------------------------------------------------------------------------------------------------------------------------------------------------------------------------------------------------------------------------------------------------------------------------------------------------------------------------------------------------------------------------------------------------------------------------------------------------------------------------------------------------------------------------------------------------------------------------------------------------------------------------------------------------------------------------------------------------------------------------------------------------------------------------------------------------------------------------------------------------------------------------------------------------------------------------------------------------------------------------------------------------------------------------------------------------------------------------------------------------------------------------------------------------------------------------------------------------------------------------------------------------------------------------------------------------------------------------------------------------------------------------------------------------------------------------------------------------------------------------------------------------------------------------------------------------------------------------------------------------------------------------------------------------------------------------------------------------------------------------------------------------------------------------------------------------------------------------------------------------------------------------------------------------------------------------------------------------------------------------------------------------------------------------------------------------------------------------------------------------------------------------------------------------------------------------------------------------------------------------------------------------------------------------------------------------------------------------------------------------------------------------------------------------------------------------------------------------------------------------------------------------------------------------------------------------------------------------------------------------------------------------------------------------------------------------------------------------------------------------------------------------------------------------------------------------------------------------------------------------------------------------------------------------------------------------------------------------------------------------------------------------------------------------------------------------------------------------------------------------------------------------------------------------------------------------------------------------------------------------------------------------------------------------------------------------------------------------------------------------------------------------------------------------------------------------------------------------------------------------------------------------------------------------------------------------------------------------------------------------------------------------------------------------------------------------------------------------------------------------------------------------------------------------------------------------------------------------------------------------------------------------------------------------------------------------------------------------------------------------------------------------------------------------------------------------------------------------------------------------------------------------------------------------------------------------------------------------------------------------------------------------------------------------------------------------------------------------------------------------------------------------------------------------------------------------------------------------------------------------------------------------------------------------------------------------------------------------------------------------------------------------------------------------------------------------------------------------------------------------------------------------------------------------------------------------------------------------------------------------------------------------------------------------------------------------------------------------------------------------------------------------------------------------------------------------------------------------------------------------------------------------------------------------------------------------------------------------------------------------------------------------------------------------------------------------------------------------------------------------------------------------------------------------------------------------------------------------------------------------------------------------------------------------------------------------------------------------------------------------------------------------------------------------------------------------------------------------------------------------------------------------------------------------------------------------------------------------------------------------------------------------------------------------------------------------------------------------------------------------------------------------------------------------------------------------------------------------------------------------------------------------------------------------------------------------------------------------------------------------------------------------------------------------------------------------------------------------------------------------------------------------------------------------------------------------------------------------------------------------------------------------------------------------------------------------------------------------------------------------------------------------------------------------------------------------------------------------------------------------------------------------------------------------------------------------------------------------------------------------------------------------------------------------------------------------------------------------------------------------------------------------------------------------------------------------------------------------------------------------------------------------------------------------------------------------------------------------------------------------------------------------------------------------------------------------------------------------------------------------------------------------------------------------------------------------------------------------------------------------------------------------------------------------------------------------------------------------------------------------------------------------------------------------------------------------------------------------------------------------------------------------------------------------------------------------------------------------------------------------------------------------------------------------------------------------------------------------------------------------------------------------------------------------------------------------------------------------------------------------------------------------------------------------------------------------------------------------------------------------------------------------------------------------------------------------------------------------------------------------------------------------------------------------------------------------------------------------------------------------------------------------------------------------------------------------------------------------------------------------------------------------------------------------------------------------------------------------------------------------------------------------------------------------------------------------------------------------------------------------------------------------------------------------------------------------------------------------------------------------------------------------------------------------------------------------------------------------------------------------------------------------------------------------------------------------------------------------------------------------------------------------------------------------------------------------------------------------------------------------------------------------------------------------------------------------------------------------------------------------------------------------------------------------------------------------------------------------------------------------------------------------------------------------------------------------------------------------------------------------------------------------------------------------------------------------------------------------------------------------------------------------|-----|-----|-----|-----|-----|-----|-----|-----|-----|-----|-----|-----|-----|-----|-----|--|
|              |  | 560                                                                                                                                                                                                                                                                                                                                                                                                                                                                                                                                                                                                                                                                                                                                                                                                                                                                                                                                                                                                                                                                                                                                                                                                                                                                                                                                                                                                                                                                                                                                                                                                                                                                                                                                                                                                                                                                                                                                                                                                                                                                                                                                                                                                                                                                                                                                                                                                                                                                                                                                                                                                                                                                                                                                                                                                                                                                                                                                                                                                                                                                                                                                                                                                                                                                                                                                                                                                                                                                                                                                                                                                                                                                                                                                                                                                                                                                                                                                                                                                                                                                                                                                                                                                                                                                                                                                                                                                                                                                                                                                                                                                                                                                                                                                                                                                                                                                                                                                                                                                                                                                                                                                                                                                                                                                                                                                                                                                                                                                                                                                                                                                                                                                                                                                                                                                                                                                                                                                                                                                                                                                                                                                                                                                                                                                                                                                                                                                                                                                                                                                                                                                                                                                                                                                                                                                                                                                                                                                                                                                                                                                                                                                                                                                                                                                                                                                                                                                                                                                                                                                                                                                                                                                                                                                                                                                                                                                                                                                                                                                                                                                                                                                                                                                                                                                                                                                                                                                                                                                                                                                                                                                                                                                                                                                                                                                                                                                                                                                                                                                                                                                                                                                                                                                                                                                                                                                                                                                                                                                                                                                                                                                                                                                                                                                                                                                                                                                                                                                                                                                                                                                                                                                                                                                                                                                                                                                                                                                                                                                                                                                                                                                                                                                                                                                                                                                                                                                                                                                                                                                                                                                                                                                                                                                                                                                                                                                                                                                                                                                                                                                                                                                                                                                                                                                                                                                                                                                                                                                                                                                                                                                                                                                                                                                                                                                                                                                                                                                                                                                                                                                                                                                                                                                                                                                                                                                                                                                                                                                                                                                                                                                                                                                                                                                                                                                                                                                                                                                                                                                                                                                                                                                                                                                                                                                                                                                                                                                                                                                                                                                                                                                                                                                                                                                                                                                                                                                                                                                                                                                                                                                                                                                                                                                                                                                                                                                                                                                                                                                                                                                                                                                                                                                                                                                                                                                                                                                                                                                                                                                                                                                                                                                                                                                                                                                                                               | 565 | 570 | 575 | 580 | 585 | 590 | 595 | 600 | 605 | 610 | 615 | 620 | 625 | 630 | 635 |  |
| conservation |  | * ! * ! * ! * ! * ! * ! * ! * ! * ! * ! * ! * ! * ! * ! * ! * ! * ! * ! * ! * ! * ! * ! * ! * ! * ! * ! * ! * ! * ! * ! * ! * ! * ! * ! * ! * ! * ! * ! * ! * ! * ! * ! * ! * ! * ! * ! * ! * ! * ! * ! * ! * ! * ! * ! * ! * ! * ! * ! * ! * ! * ! * ! * ! * ! * ! * ! * ! * ! * ! * ! * ! * ! * ! * ! * ! * ! * ! * ! * ! * ! * ! * ! * ! * ! * ! * ! * ! * ! * ! * ! * ! * ! * ! * ! * ! * ! * ! * ! * ! * ! * ! * ! * ! * ! * ! * ! * ! * ! * ! * ! * ! * ! * ! * ! * ! * ! * ! * ! * ! * ! * ! * ! * ! * ! * ! * ! * ! * ! * ! * ! * ! * ! * ! * ! * ! * ! * ! * ! * ! * ! * ! * ! * ! * ! * ! * ! * ! * ! * ! * ! * ! * ! * ! * ! * ! * ! * ! * ! * ! * ! * ! * ! * ! * ! * ! * ! * ! * ! * ! * ! * ! * ! * ! * ! * ! * ! * ! * ! * ! * ! * ! * ! * ! * ! * ! * ! * ! * ! * ! * ! * ! * ! * ! * ! * ! * ! * ! * ! * ! * ! * ! * ! * ! * ! * ! * ! * ! * ! * ! * ! * ! * ! * ! * ! * ! * ! * ! * ! * ! * ! * ! * ! * ! * ! * ! * ! * ! * ! * ! * ! * ! * ! * ! * ! * ! * ! * ! * ! * ! * ! * ! * ! * ! * ! * ! * ! * ! * ! * ! * ! * ! * ! * ! * ! * ! * ! * ! * ! * ! * ! * ! * ! * ! * ! * ! * ! * ! * ! * ! * ! * ! * ! * ! * ! * ! * ! * ! * ! * ! * ! * ! * ! * ! * ! * ! * ! * ! * ! * ! * ! * ! * ! * ! * ! * ! * ! * ! * ! * ! * ! * ! * ! * ! * ! * ! * ! * ! * ! * ! * ! * ! * ! * ! * ! * ! * ! * ! * ! * ! * ! * ! * ! * ! * ! * ! * ! * ! * ! * ! * ! * ! * ! * ! * ! * ! * ! * ! * ! * ! * ! * ! * ! * ! * ! * ! * ! * ! * ! * ! * ! * ! * ! * ! * ! * ! * ! * ! * ! * ! * ! * ! * ! * ! * ! * ! * ! * ! * ! * ! * ! * ! * ! * ! * ! * ! * ! * ! * ! * ! * ! * ! * ! * ! * ! * ! * ! * ! * ! * ! * ! * ! * ! * ! * ! * ! * ! * ! * ! * ! * ! * ! * ! * ! * ! * ! * ! * ! * ! * ! * ! * ! * ! * ! * ! * ! * ! * ! * ! * ! * ! * ! * ! * ! * ! * ! * ! * ! * ! * ! * ! * ! * ! * ! * ! * ! * ! * ! * ! * ! * ! * ! * ! * ! * ! * ! * ! * ! * ! * ! * ! * ! * ! * ! * ! * ! * ! * ! * ! * ! * ! * ! * ! * ! * ! * ! * ! * ! * ! * ! * ! * ! * ! * ! * ! * ! * ! * ! * ! * ! * ! * ! * ! * ! * ! * ! * ! * ! * ! * ! * ! * ! * ! * ! * ! * ! * ! * ! * ! * ! * ! * ! * ! * ! * ! * ! * ! * ! * ! * ! * ! * ! * ! * ! * ! * ! * ! * ! * ! * ! * ! * ! * ! * ! * ! * ! * ! * ! * ! * ! * ! * ! * ! * ! * ! * ! * ! * ! * ! * ! * ! * ! * ! * ! * ! * ! * ! * ! * ! * ! * ! * ! * ! * ! * ! * ! * ! * ! * ! * ! * ! * ! * ! * ! * ! * ! * ! * ! * ! * ! * ! * ! * ! * ! * ! * ! * ! * ! * ! * ! * ! * ! * ! * ! * ! * ! * ! * ! * ! * ! * ! * ! * ! * ! * ! * ! * ! * ! * ! * ! * ! * ! * ! * ! * ! * ! * ! * ! * ! * ! * ! * ! * ! * ! * ! * ! * ! * ! * ! * ! * ! * ! * ! * ! * ! * ! * ! * ! * ! * ! * ! * ! * ! * ! * ! * ! * ! * ! * ! * ! * ! * ! * ! * ! * ! * ! * ! * ! * ! * ! * ! * ! * ! * ! * ! * ! * ! * ! * ! * ! * ! * ! * ! * ! * ! * ! * ! * ! * ! * ! * ! * ! * ! * ! * ! * ! * ! * ! * ! * ! * ! * ! * ! * ! * ! * ! * ! * ! * ! * ! * ! * ! * ! * ! * ! * ! * ! * ! * ! * ! * ! * ! * ! * ! * ! * ! * ! * ! * ! * ! * ! * ! * ! * ! * ! * ! * ! * ! * ! * ! * ! * ! * ! * ! * ! * ! * ! * ! * ! * ! * ! * ! * ! * ! * ! * ! * ! * ! * ! * ! * ! * ! * ! * ! * ! * ! * ! * ! * ! * ! * ! * ! * ! * ! * ! * ! * ! * ! * ! * ! * ! * ! * ! * ! * ! * ! * ! * ! * ! * ! * ! * ! * ! * ! * ! * ! * ! * ! * ! * ! * ! * ! * ! * ! * ! * ! * ! * ! * ! * ! * ! * ! * ! * ! * ! * ! * ! * ! * ! * ! * ! * ! * ! * ! * ! * ! * ! * ! * ! * ! * ! * ! * ! * ! * ! * ! * ! * ! * ! * ! * ! * ! * ! * ! * ! * ! * ! * ! * ! * ! * ! * ! * ! * ! * ! * ! * ! * ! * ! * ! * ! * ! * ! * ! * ! * ! * ! * ! * ! * ! * ! * ! * ! * ! * ! * ! * ! * ! * ! * ! * ! * ! * ! * ! * ! * ! * ! * ! * ! * ! * ! * ! * ! * ! * ! * ! * ! * ! * ! * ! * ! * ! * ! * ! * ! * ! * ! * ! * ! * ! * ! * ! * ! * ! * ! * ! * ! * ! * ! * ! * ! * ! * ! * ! * ! * ! * ! * ! * ! * ! * ! * ! * ! * ! * ! * ! * ! * ! * ! * ! * ! * ! * ! * ! * ! * ! * ! * ! * ! * ! * ! * ! * ! * ! * ! * ! * ! * ! * ! * ! * ! * ! * ! * ! * ! * ! * ! * ! * ! * ! * ! * ! * ! * ! * ! * ! * ! * ! * ! * ! * ! * ! * ! * ! * ! * ! * ! * ! * ! * ! * ! * ! * ! * ! * ! * ! * ! * ! * ! * ! * ! * ! * ! * ! * ! * ! * ! * ! * ! * ! * ! * ! * ! * ! * ! * ! * ! * ! * ! * ! * ! * ! * ! * ! * ! * ! * ! * ! * ! * ! * ! * ! * ! * ! * ! * ! * ! * ! * ! * ! * ! * ! * ! * ! * ! * ! * ! * ! * ! * ! * ! * ! * ! * ! * ! * ! * ! * ! * ! * ! * ! * ! * ! * ! * ! * ! * ! * ! * ! * ! * ! * ! * ! * ! * ! * ! * ! * ! * ! * ! * ! * ! * ! * ! * ! * ! * ! * ! * ! * ! * ! * ! * ! * ! * ! * ! * ! * ! * ! * ! * ! * ! * ! * ! * ! * ! * ! * ! * ! * ! * ! * ! * ! * ! * ! * ! * ! * ! * ! * ! * ! * ! * ! * ! * ! * ! * ! * ! * ! * ! * ! * ! * ! * ! * ! * ! * ! * ! * ! * ! * ! * ! * ! * ! * ! * ! * ! * ! * ! * ! * ! * ! * ! * ! * ! * ! * ! * ! * ! * ! * ! * ! * ! * ! * ! * ! * ! * ! * ! * ! * ! * ! * ! * ! * ! * ! * ! * ! * ! * ! * ! * ! * ! * ! * ! * ! * ! * ! * ! * ! * ! * ! * ! * ! * ! * ! * ! * ! * ! * ! * ! * ! * ! * ! * ! * ! * ! * ! * ! * ! * ! * ! * ! * ! * ! * ! * ! * ! * ! * ! * ! * ! * ! * ! * ! * ! * ! * ! * ! * ! * ! * ! * ! * ! * ! * ! * ! * ! * ! * ! * ! * ! * ! * ! * ! * ! * ! * ! * ! * ! * ! * ! * ! * ! * ! * ! * ! * ! * ! * ! * ! * ! * ! * ! * ! * ! * ! * ! * ! * ! * ! * ! * ! * ! * ! * ! * ! * ! * ! * ! * ! * ! * ! * ! * ! * ! * ! * ! * ! * ! * ! * ! * ! * ! * ! * ! * ! * ! * ! * ! * ! * ! * ! * ! * ! * ! * ! * ! * ! * ! * ! * ! * ! * ! * ! * ! * ! * ! * ! * ! * ! * ! * ! * ! * ! * ! * ! * ! * ! * ! * ! * ! * ! * ! * ! * ! * ! * ! * ! * ! * ! * ! * ! * ! * ! * ! * ! * ! * ! * ! * ! * ! * ! * ! * ! * ! * ! * ! * ! * ! * ! * ! * ! * ! * ! * ! * ! * ! * ! * ! * ! * ! * ! * ! * ! * ! * ! * ! * ! * ! * ! * ! * ! * ! * ! * ! * ! * ! * ! * ! * ! * ! * ! * ! * ! * ! * ! * ! * ! * ! * ! * ! * ! * ! * ! * ! * ! * ! * ! * ! * ! * ! * ! * ! * ! * ! * ! * ! * ! * ! * ! * ! * ! * ! * ! * ! * ! * ! * ! * ! * ! * ! * ! * ! * ! * ! * ! * ! * ! * ! * ! * ! * ! * ! * ! * ! * ! * ! * ! * ! * ! * ! * ! * ! * ! * ! * ! * ! * ! * ! * ! * ! * ! * ! * ! * ! * ! * ! * ! * ! * ! * ! * ! * ! * ! * ! * ! * ! * ! * ! * ! * ! * ! * ! * ! * ! * ! * ! * ! * ! * ! * ! * ! * ! * ! * ! * ! * ! * ! * ! * ! * ! * ! * ! * ! * ! * ! * ! * ! * ! * ! * ! * ! * ! * ! * ! * ! * ! * ! * ! * ! * ! * ! * ! * ! * ! * ! * ! * ! * ! * ! * ! * ! * ! * ! * ! * ! * ! * ! * ! * ! * ! * ! * ! * ! * ! * ! * ! * ! * ! * ! * ! * ! * ! * ! * ! * ! * ! * ! * ! * ! * ! * ! * ! * ! * ! * ! * ! * ! * ! * ! * ! * ! * ! * ! * ! * ! * ! * ! * ! * ! * ! * ! * ! * ! * ! * ! * ! * ! * ! * ! * ! * ! * ! * ! * ! * ! * ! * ! * ! * ! * ! * ! * ! * ! * ! * ! * ! * ! * ! * ! * ! * ! * ! * ! * ! * ! * ! * ! * ! * ! * ! * ! * ! * ! * ! * ! * ! * ! * ! * ! * ! * ! * ! * ! * ! * ! * ! * ! * ! * ! * ! * ! * ! * ! * ! * ! * ! * ! * ! * ! * ! * ! * ! * ! * ! * ! * ! * ! * ! * ! * ! * ! * ! * ! * ! * ! * ! * ! * ! * ! * ! * ! * ! * ! * ! * ! * ! * ! * ! * ! * ! * ! * ! * ! * ! * ! * ! * ! * ! * ! * ! * ! * ! * ! * ! * ! * ! * ! * ! * ! * ! * ! * ! * ! * ! * ! * ! * ! * ! * ! * ! * ! * ! * ! * ! * ! * ! * ! * ! * ! * ! * ! * ! * ! * ! * ! * ! * ! * ! * ! * ! * ! * ! * ! * ! * ! * ! * ! * ! * ! * ! * ! * ! * ! * ! * ! * ! * ! * ! * ! * ! * ! * ! * ! * ! * ! * ! * ! * ! * ! * ! * ! * ! * ! * ! * ! * ! * ! * ! * ! * ! * ! * ! * ! * ! * ! * ! * ! * ! * ! * ! * ! * ! * ! * ! * ! * ! * ! * ! * ! * ! * ! * ! * ! * ! * ! * ! * ! * ! * ! * ! * ! * ! * ! * ! * ! * ! * ! * ! * ! * ! * ! * ! * ! * ! * ! * ! * ! * ! * ! * ! * ! * ! * ! * ! * ! * ! * ! * ! * ! * ! * ! * ! * ! * ! * ! * ! * ! * ! * ! * ! * ! * ! * ! * ! * ! * ! * ! * ! * ! * ! * ! * ! * ! * ! * ! * ! * ! * ! * ! * ! * ! * ! * ! * ! * ! * ! * ! * ! * ! * ! * ! * ! * ! * ! * ! * ! * ! * ! * ! * ! * ! * ! * ! * ! * ! * ! * ! * ! * ! * ! * ! * ! * ! * ! * ! * ! * ! * ! * ! * ! * ! * ! * ! * ! * ! * ! * ! * ! * ! * ! * ! * ! * ! * ! * ! * ! * ! * ! * ! * ! * ! * ! * ! * ! * ! * ! * ! * ! * ! * ! * ! * ! * ! * ! * ! * ! * ! * ! * ! * ! * ! * ! * ! * ! * ! * ! * ! * ! * ! * ! * ! * ! * ! * ! * ! * ! * ! * ! * ! * ! * ! * ! * ! * ! * ! * ! * ! * ! * ! * ! * ! * ! * ! * ! * ! * ! * ! * ! * ! * ! * ! * ! * ! * ! * ! * ! * ! * ! * ! * ! * ! * ! * ! * ! * ! * ! * ! * ! * ! * ! * ! * ! * ! * ! * ! * ! * ! * ! * ! * ! * ! * ! * ! * ! * ! * ! * ! * ! * ! * ! * ! * ! * ! * ! * ! * ! * ! * ! * ! * ! * ! * ! * ! * ! * ! * ! * ! * ! * ! * ! * ! * ! * ! * ! * ! * ! * ! * ! * ! * ! * ! * ! * ! * ! * ! * ! * ! * ! * ! * ! * ! * ! * ! * ! * ! * ! * ! * ! * ! * ! * ! * ! * ! * ! * ! * ! * ! * ! * ! * ! * ! * ! * ! * ! * ! * ! * ! * ! * ! * ! * ! * ! * ! * ! * ! * ! * ! * ! * ! * ! * ! * ! * ! * ! * ! * ! * ! * ! * ! * ! * ! * ! * ! * ! * ! * ! * ! * ! * ! * ! * ! * ! * ! * ! * ! * ! * ! * ! * ! * ! * ! * ! * ! * ! * ! * ! * ! * ! * ! * ! * ! * ! * ! * ! * ! * ! * ! * ! * ! * ! * ! * ! * ! * ! * ! * ! * ! * ! * ! * ! * ! * ! * ! * ! * ! * ! * ! * ! * ! * ! * ! * ! * ! * ! * ! * ! * ! * ! * ! * ! * ! * ! * ! * ! * ! * ! * ! * ! * ! * ! * ! * ! * ! * ! * ! * ! * ! * ! * ! * ! * ! * ! * ! * ! * ! * ! * ! * ! * ! * ! * ! * ! * ! * ! * ! * ! * ! * ! * ! * ! * ! * ! * ! * ! * ! * ! * ! * ! * ! * ! * ! * ! * ! * ! * ! * ! * ! * ! * ! * ! * ! * ! * ! * ! * ! * ! * ! * ! * ! * ! * ! * ! * ! * ! * ! * ! * ! * ! * ! * ! * ! * ! * ! * ! * ! * ! * ! * ! * ! * ! * ! * ! * ! * ! * ! * ! * ! * ! * ! * ! * ! * ! * ! * ! * ! * ! * ! * ! * ! * ! * ! * ! * ! * ! * ! * ! * ! * ! * ! * ! * ! * ! * ! * ! * ! * ! * ! * ! * ! * ! * ! * ! * ! * ! * ! * ! * ! * ! * ! * ! * ! * ! * ! * ! * ! * ! * ! * ! * ! * ! * ! * ! * ! * ! * ! * ! * ! * ! * ! * ! * ! * ! * ! * ! * ! * ! * ! * ! * ! * ! * ! * ! * ! * ! * ! * ! * ! * ! * ! * ! * ! * ! * ! * ! * ! * ! * ! * ! * ! * ! * ! * ! * ! * ! * ! * ! * ! * ! * ! * ! * ! * ! * ! * ! * ! * ! * ! * ! * ! * ! * ! * ! * ! * ! * ! * ! * ! * ! * ! * ! * ! * ! * ! * ! * ! * ! * ! * ! * ! * ! * ! * ! * ! * ! * ! * ! * ! * ! * ! * ! * ! * ! * ! * ! * ! * ! * ! * ! * ! * ! * ! * ! * ! * ! * ! * ! * ! * ! * ! * ! * ! * ! * ! * ! * ! * ! * ! * ! * ! * ! * ! * ! * ! * ! * ! * ! * ! * ! * ! * ! * ! * ! * ! * ! * ! * ! * ! * ! * ! * ! * ! * ! * ! * ! * ! * ! * ! * ! * ! * ! * ! * ! * ! * ! * ! * ! * ! * ! * ! * ! * ! * ! * ! * ! * ! * ! * ! * ! * ! * ! * ! * ! * ! * ! * ! * ! * ! * ! * ! * ! * ! * ! * ! * ! * ! * ! * ! * ! * ! * ! * ! * ! * ! * ! * ! * ! * ! * ! * ! * ! * ! * ! * ! * ! * ! * ! * ! * ! * ! * ! * ! * ! * ! * ! * ! * ! * ! * ! * ! * ! * ! * ! * ! * ! * ! * ! * ! * ! * ! * ! * ! * ! * ! * ! * ! * ! * ! * ! * ! * ! * ! * ! * ! * ! * ! * ! * ! * ! * ! * ! * ! * ! * ! * ! * ! * ! * ! * ! * ! * ! * ! * ! * ! * ! * ! * ! * ! * ! * ! * ! * ! * ! * ! * ! * ! * ! * ! * ! * ! * ! * ! * ! * ! * ! * ! * ! * ! * ! * ! * ! * ! * ! * ! * ! * ! * ! * ! * ! * ! * ! * ! * ! * ! * ! * ! * ! * ! * ! * ! * ! * ! * ! * ! * ! * ! * ! * ! * ! * ! * ! * ! * ! * ! * ! * ! * ! * ! * ! * ! * ! * ! * ! * ! * ! * ! * ! * ! * ! * ! * ! * ! * ! * ! * ! * ! * ! * ! * ! * ! * ! * ! * ! * ! * ! * ! * ! * ! * ! * ! * ! * ! * ! * ! * ! * ! * ! * ! * ! * ! * ! * ! * ! * ! * ! * ! * ! * ! * ! * ! * ! * ! * ! * ! * ! * ! * ! * ! * ! * ! * ! * ! * ! * ! * ! * ! * ! * ! * ! * ! * ! * ! * ! * ! * ! * ! * ! * ! * ! * ! * ! * ! * ! * ! * ! * ! * ! * ! * ! * ! * ! * ! * ! * ! * ! * ! * ! * ! * ! * ! * ! * ! * ! * ! * ! * ! * ! * ! * ! * ! * ! * ! * ! * ! * ! * ! * ! * ! * ! * ! * ! * ! * ! * ! * ! * ! * ! * ! * ! * ! * ! * ! * ! * ! * ! * ! * ! * ! * ! * ! * ! * ! * ! * ! * ! * ! * ! * ! * ! * ! * ! * ! * ! * ! * ! * ! * ! * ! * ! * ! * ! * ! * ! * ! * ! * ! * ! * ! * ! * ! * ! * ! * ! * ! * ! * ! * ! * ! * ! * ! * ! * ! * ! * ! * ! * ! * ! * ! * ! * ! * ! * ! * ! * ! * ! * ! * ! * ! * ! * ! * ! * ! * ! * ! * ! * ! * ! * ! * ! * ! * ! * ! * ! * ! * ! * ! * ! * ! * ! * ! * ! * ! * ! * ! * ! * ! * ! * ! * ! * ! * ! * ! * ! * ! * ! * ! * ! * ! * ! * ! * ! * ! * ! * ! * ! * ! * ! * ! * ! * ! * ! * ! * ! * ! * ! * ! * ! * ! * ! * ! * ! * ! * ! * ! * ! * ! * ! * ! * ! * ! * ! * ! * ! * ! * ! * ! * ! * ! * ! * ! * ! * ! * ! * ! * ! * ! * ! * ! * ! * ! * ! * ! * ! * ! * ! * ! * ! * ! * ! * ! * ! * ! * ! * ! * ! * ! * ! * ! * ! * ! * ! * ! * ! * ! * ! * ! * ! * ! * ! * ! * ! * ! * ! * ! * ! * ! * ! * ! * ! * ! * ! * ! * ! * ! * ! * ! * ! * ! * ! * ! * ! * ! * ! * ! * ! * ! * ! * ! * ! * ! * ! * ! * ! * ! * ! * ! * ! * ! * ! * ! * ! * ! * ! * ! * ! * ! * ! * ! * ! * ! * ! * ! * ! * ! * ! * ! * ! * ! * ! * ! * ! * ! * ! * ! * ! * ! * ! * ! * ! * ! * ! * ! * ! * ! * ! * ! * ! * ! * ! * ! * ! * ! * ! * ! * ! * ! * ! * ! * ! * ! * ! * ! * ! * ! * ! * ! * ! * ! * ! * ! * ! * ! * ! * ! * ! * ! * ! * ! * ! * ! * ! * ! * ! * ! * ! * ! * ! * ! * ! * ! * ! * ! * ! * ! * ! * ! * ! * ! * ! * ! * ! * ! * ! * ! * ! * ! * ! * ! * ! * ! * ! * ! * ! * ! * ! * ! * ! * ! * ! * ! * ! * ! * ! * ! * ! * ! * ! * ! * ! * ! * ! * ! * ! * ! * ! * ! * ! * ! * ! * ! * ! * ! * ! * ! * ! * ! * ! * ! * ! * ! * ! * ! * ! * ! * ! * ! * ! * ! * ! * ! * ! * ! * ! * ! * ! * ! * ! * ! * ! * ! * ! * ! * ! * ! * ! * ! * ! * ! * ! * ! * ! * ! * ! * ! * ! * ! * ! * ! * ! * ! * ! * ! * ! * ! * ! * ! * ! * ! * ! * ! * ! * ! * ! * ! * ! * ! * ! * ! * ! * ! * ! * ! * ! * ! * ! * ! * ! * ! * ! * ! * ! * ! * ! * ! * ! * ! * ! * ! * ! * ! * ! * ! * ! * ! * ! * ! * ! * ! * ! * ! * ! * ! * ! * ! * ! * ! * ! * ! * ! * ! * ! * ! * ! * ! * ! * ! * ! * ! * ! * ! * ! * ! * ! * ! * ! * ! * ! * ! * ! * ! * ! * ! * ! * ! * ! * ! * ! * ! * ! * ! * ! * ! * ! * ! * ! * ! * ! * ! * ! * ! * ! * ! * ! * ! * ! * ! * ! * ! * ! * ! * ! * ! * ! * ! * ! * ! * ! * ! * ! * ! * ! * ! * ! * ! * ! * ! * ! * ! * ! * ! * ! * ! * ! * ! * ! * ! * ! * ! * ! * ! * ! * ! * ! * ! * ! * ! * ! * ! * ! * ! * ! * ! * ! * ! * ! * ! * ! * ! * ! * ! * ! * ! * ! * ! * ! * ! * ! * ! * ! * ! * ! * ! * ! * ! * ! * ! * ! * ! * ! * ! * ! * ! * ! * ! * ! * ! * ! * ! * ! * ! * ! * ! * ! * ! * ! * ! * ! * ! * ! * ! * ! * ! * ! * ! * ! * ! * ! * ! * ! * ! * ! * ! * ! * ! * ! * ! * ! * ! * ! * ! * ! * ! * ! * ! * ! * ! * ! * ! * ! * ! * ! * ! * ! * ! * ! * ! * ! * ! * ! * ! * ! * ! * ! * ! * ! * ! * ! * ! * ! * ! * ! * ! * ! * ! * ! * ! * ! * ! * ! * ! * ! * ! * ! * ! * ! * ! * ! * ! * ! * ! * ! * ! * ! * ! * ! * ! * ! * ! * ! * ! * ! * ! * ! * ! * ! * ! * ! * ! * ! * ! * ! * ! * ! * ! * ! * ! * ! * ! * ! * ! * ! * ! * ! * ! * ! * ! * ! * ! * ! * ! * ! * ! * ! * ! * ! * ! * ! * ! * ! * ! * ! * ! * ! * ! * ! * ! * ! * ! * ! * ! * ! * ! * ! * ! * ! * ! * ! * ! * ! * ! * ! * ! * ! * ! * ! * ! * ! * ! * ! * ! * ! * ! * ! * ! * ! * ! * ! * ! * ! * ! * ! * ! * ! * ! * ! * ! * ! * ! * ! * ! * ! * ! * ! * ! * ! * ! * ! * ! * ! * ! * ! * ! * ! * ! * ! * ! * ! * ! * ! * ! * ! * ! * ! * ! * ! * ! * ! * ! * ! * ! * ! * ! * ! * ! * ! * ! * ! * ! * ! * ! * ! * ! * ! * ! * ! * ! * ! * ! * ! * ! * ! * ! * ! * ! * ! * ! * ! * ! * ! * ! * ! * ! * ! * ! * ! * ! * ! * ! * ! * ! * ! * ! * ! * ! * ! * ! * ! * ! * ! * ! * ! * ! * ! * ! * ! * ! * ! * ! * ! * ! * ! * ! * ! * ! * ! * ! * ! * ! * ! * ! * ! * ! * ! * ! * ! * ! * ! * ! * ! * ! * ! * ! * ! * ! * ! * ! * ! * ! * ! * ! * ! * ! * ! * ! * ! * ! * ! * ! * ! * ! * ! * ! * ! * ! * ! * ! * ! * ! * ! * ! * ! * ! * ! * ! * ! * ! * ! * ! * ! * ! * ! * ! * ! * ! * ! * ! * ! * ! * ! * ! * ! * ! * ! * ! * ! * ! * ! * ! * ! * ! * ! * ! * ! * ! * ! * ! * ! * ! * ! * ! * ! * ! * ! * ! * ! * ! * ! * ! * ! * ! * ! * ! * ! * ! * ! * ! * ! * ! * ! * ! * ! * ! * ! * ! * ! * ! * ! * ! * ! * ! * ! * ! * ! * ! * ! * ! * ! * ! * ! * ! * ! * ! * ! * ! * ! * ! * ! * ! * ! * ! * ! * ! * ! * ! * ! * ! * ! * ! * |     |     |     |     |     |     |     |     |     |     |     |     |     |     |     |  |

|              |                                                                                                                                                                                                                                                                                                                                                                                                                                                                                                                                                                                                                                                                                                                                                                                                                                                                                                                                                                                                                                                                                                                                                                                                                                                                                                                                                                                                                                                                                                                                                                                                                                                                                                                                                                                                                                                                                                                                                                                                                                                                                                                                                                                                                                                                                                                                                                                                                                                                                                                                                                                                                                                                                                                                                                                                                                                                                                                                                                                                                                                                                                                                                                                                                                                                                                                                                                                                                                                                                                                                                                                                                                                                                                                                                                                                                                                                                                                                                                                                                                                                                                                                                                                                                                                                                                                                                                                                                                                                                                                                                                                                                                                                                                                                                                                                                                                                                                                                                                                                                                                                                                                                                                                                                                                                                                                                                                                                                                                                                                                                                                                                                                                                                                                                                                                                                                                                                                                                                                                                                                                                                                                                                                                                                                                                                                                                                                                                                                                                                                                                                                                                                                                                                                                                                                                                                                                                                                                                                                                                                                                                                                                                                                                                                                                                                                                                                                                                                                                                                                                                                                                                                                                                                                                                                                                                                                                                                                                                                                                                                                                                                                                                                                                                                                                                                                                                                                                                                                                                                                                                                                                                                                                                                                                                                                                                                                                                                                                                                                                                                                                                                                                                                                                                                                                                                                                                                                                                                                                                                                                                                                                                                                                                                                                                                                                                                                                                                                                                                                                                                                                                                                                                                                                                                                                                                                                                                                                                                                                                                                                                                                                                                                                                                                                                                                                                                                                                                                                                                                                                                                                                                                                                                                                                                                                                                                                                                                                                                                                                                                                                                                                                                                                                                                                                                                                                                                                                                                                                                                                                                                                                                                                                                                                                                                                                                                                                                                                                                                                                                                                                                                                                                                                                                                                                                                                                                                                                                                                                                                                                                                                                                                                                                                                                                                                                                                                                                                                                                                                                                                                                                                                                                                                                                                                                                                                                                                                                                                                                                                                                                                                                                                                                                                                                                                                                                                                                                                                                                                                                                                                                                                                                                                                                                                                                                                                                                                                                                                                                                                                                                                                                                                                                                                                                                                                                                                                                                                                                                                                                                                                                                                                                                                                                                                                                                                           |     |     |     |     |     |     |     |     |     |     |     |     |     |     |     |  |
|--------------|---------------------------------------------------------------------------------------------------------------------------------------------------------------------------------------------------------------------------------------------------------------------------------------------------------------------------------------------------------------------------------------------------------------------------------------------------------------------------------------------------------------------------------------------------------------------------------------------------------------------------------------------------------------------------------------------------------------------------------------------------------------------------------------------------------------------------------------------------------------------------------------------------------------------------------------------------------------------------------------------------------------------------------------------------------------------------------------------------------------------------------------------------------------------------------------------------------------------------------------------------------------------------------------------------------------------------------------------------------------------------------------------------------------------------------------------------------------------------------------------------------------------------------------------------------------------------------------------------------------------------------------------------------------------------------------------------------------------------------------------------------------------------------------------------------------------------------------------------------------------------------------------------------------------------------------------------------------------------------------------------------------------------------------------------------------------------------------------------------------------------------------------------------------------------------------------------------------------------------------------------------------------------------------------------------------------------------------------------------------------------------------------------------------------------------------------------------------------------------------------------------------------------------------------------------------------------------------------------------------------------------------------------------------------------------------------------------------------------------------------------------------------------------------------------------------------------------------------------------------------------------------------------------------------------------------------------------------------------------------------------------------------------------------------------------------------------------------------------------------------------------------------------------------------------------------------------------------------------------------------------------------------------------------------------------------------------------------------------------------------------------------------------------------------------------------------------------------------------------------------------------------------------------------------------------------------------------------------------------------------------------------------------------------------------------------------------------------------------------------------------------------------------------------------------------------------------------------------------------------------------------------------------------------------------------------------------------------------------------------------------------------------------------------------------------------------------------------------------------------------------------------------------------------------------------------------------------------------------------------------------------------------------------------------------------------------------------------------------------------------------------------------------------------------------------------------------------------------------------------------------------------------------------------------------------------------------------------------------------------------------------------------------------------------------------------------------------------------------------------------------------------------------------------------------------------------------------------------------------------------------------------------------------------------------------------------------------------------------------------------------------------------------------------------------------------------------------------------------------------------------------------------------------------------------------------------------------------------------------------------------------------------------------------------------------------------------------------------------------------------------------------------------------------------------------------------------------------------------------------------------------------------------------------------------------------------------------------------------------------------------------------------------------------------------------------------------------------------------------------------------------------------------------------------------------------------------------------------------------------------------------------------------------------------------------------------------------------------------------------------------------------------------------------------------------------------------------------------------------------------------------------------------------------------------------------------------------------------------------------------------------------------------------------------------------------------------------------------------------------------------------------------------------------------------------------------------------------------------------------------------------------------------------------------------------------------------------------------------------------------------------------------------------------------------------------------------------------------------------------------------------------------------------------------------------------------------------------------------------------------------------------------------------------------------------------------------------------------------------------------------------------------------------------------------------------------------------------------------------------------------------------------------------------------------------------------------------------------------------------------------------------------------------------------------------------------------------------------------------------------------------------------------------------------------------------------------------------------------------------------------------------------------------------------------------------------------------------------------------------------------------------------------------------------------------------------------------------------------------------------------------------------------------------------------------------------------------------------------------------------------------------------------------------------------------------------------------------------------------------------------------------------------------------------------------------------------------------------------------------------------------------------------------------------------------------------------------------------------------------------------------------------------------------------------------------------------------------------------------------------------------------------------------------------------------------------------------------------------------------------------------------------------------------------------------------------------------------------------------------------------------------------------------------------------------------------------------------------------------------------------------------------------------------------------------------------------------------------------------------------------------------------------------------------------------------------------------------------------------------------------------------------------------------------------------------------------------------------------------------------------------------------------------------------------------------------------------------------------------------------------------------------------------------------------------------------------------------------------------------------------------------------------------------------------------------------------------------------------------------------------------------------------------------------------------------------------------------------------------------------------------------------------------------------------------------------------------------------------------------------------------------------------------------------------------------------------------------------------------------------------------------------------------------------------------------------------------------------------------------------------------------------------------------------------------------------------------------------------------------------------------------------------------------------------------------------------------------------------------------------------------------------------------------------------------------------------------------------------------------------------------------------------------------------------------------------------------------------------------------------------------------------------------------------------------------------------------------------------------------------------------------------------------------------------------------------------------------------------------------------------------------------------------------------------------------------------------------------------------------------------------------------------------------------------------------------------------------------------------------------------------------------------------------------------------------------------------------------------------------------------------------------------------------------------------------------------------------------------------------------------------------------------------------------------------------------------------------------------------------------------------------------------------------------------------------------------------------------------------------------------------------------------------------------------------------------------------------------------------------------------------------------------------------------------------------------------------------------------------------------------------------------------------------------------------------------------------------------------------------------------------------------------------------------------------------------------------------------------------------------------------------------------------------------------------------------------------------------------------------------------------------------------------------------------------------------------------------------------------------------------------------------------------------------------------------------------------------------------------------------------------------------------------------------------------------------------------------------------------------------------------------------------------------------------------------------------------------------------------------------------------------------------------------------------------------------------------------------------------------------------------------------------------------------------------------------------------------------------------------------------------------------------------------------------------------------------------------------------------------------------------------------------------------------------------------------------------------------------------------------------------------------------------------------------------------------------------------------------------------------------------------------------------------------------------------------------------------------------------------------------------------------------------------------------------------------------------------------------------------------------------------------------------------------------------------------------------------------------------------------------------------------------------------------------------------------------------------------------------------------------------------------------------------------------------------------------------------------------------------------------------------------------------------------------------------------------------------------------------------------------------------------------------------------------------------------------------------------------------------------------------------------------------------------------------------------------------------------------------------------------------------------------------------------------------------------------------------------------------------------------------------------------------------------------------------------------------------------------------------------------------------------------------------------------------------------------------------------------------------------------------------------------------------------------------------------------------------------------------------------------------------------------------------------------------------------------------------------------------------------------------------------------------------------------------------------------------------------------------------------------------------------------------------------------------------------------------------------------------------------------------------------------------------------------------------------------------------------------------------------------------------------------------------------------------------------------------------------------------------------------------------------------------------------------------------------------------------------------------------------------------------------------------------------------------------------------------------------------------------------------------------------------------------------------------------------------------------------------------------------------------------------------|-----|-----|-----|-----|-----|-----|-----|-----|-----|-----|-----|-----|-----|-----|-----|--|
|              | 640                                                                                                                                                                                                                                                                                                                                                                                                                                                                                                                                                                                                                                                                                                                                                                                                                                                                                                                                                                                                                                                                                                                                                                                                                                                                                                                                                                                                                                                                                                                                                                                                                                                                                                                                                                                                                                                                                                                                                                                                                                                                                                                                                                                                                                                                                                                                                                                                                                                                                                                                                                                                                                                                                                                                                                                                                                                                                                                                                                                                                                                                                                                                                                                                                                                                                                                                                                                                                                                                                                                                                                                                                                                                                                                                                                                                                                                                                                                                                                                                                                                                                                                                                                                                                                                                                                                                                                                                                                                                                                                                                                                                                                                                                                                                                                                                                                                                                                                                                                                                                                                                                                                                                                                                                                                                                                                                                                                                                                                                                                                                                                                                                                                                                                                                                                                                                                                                                                                                                                                                                                                                                                                                                                                                                                                                                                                                                                                                                                                                                                                                                                                                                                                                                                                                                                                                                                                                                                                                                                                                                                                                                                                                                                                                                                                                                                                                                                                                                                                                                                                                                                                                                                                                                                                                                                                                                                                                                                                                                                                                                                                                                                                                                                                                                                                                                                                                                                                                                                                                                                                                                                                                                                                                                                                                                                                                                                                                                                                                                                                                                                                                                                                                                                                                                                                                                                                                                                                                                                                                                                                                                                                                                                                                                                                                                                                                                                                                                                                                                                                                                                                                                                                                                                                                                                                                                                                                                                                                                                                                                                                                                                                                                                                                                                                                                                                                                                                                                                                                                                                                                                                                                                                                                                                                                                                                                                                                                                                                                                                                                                                                                                                                                                                                                                                                                                                                                                                                                                                                                                                                                                                                                                                                                                                                                                                                                                                                                                                                                                                                                                                                                                                                                                                                                                                                                                                                                                                                                                                                                                                                                                                                                                                                                                                                                                                                                                                                                                                                                                                                                                                                                                                                                                                                                                                                                                                                                                                                                                                                                                                                                                                                                                                                                                                                                                                                                                                                                                                                                                                                                                                                                                                                                                                                                                                                                                                                                                                                                                                                                                                                                                                                                                                                                                                                                                                                                                                                                                                                                                                                                                                                                                                                                                                                                                                                                                       | 645 | 650 | 655 | 660 | 665 | 670 | 675 | 680 | 685 | 690 | 695 | 700 | 705 | 710 | 715 |  |
| conservation | * ! * ! * ! * ! * ! * ! * ! * ! * ! * ! * ! * ! * ! * ! * ! * ! * ! * ! * ! * ! * ! * ! * ! * ! * ! * ! * ! * ! * ! * ! * ! * ! * ! * ! * ! * ! * ! * ! * ! * ! * ! * ! * ! * ! * ! * ! * ! * ! * ! * ! * ! * ! * ! * ! * ! * ! * ! * ! * ! * ! * ! * ! * ! * ! * ! * ! * ! * ! * ! * ! * ! * ! * ! * ! * ! * ! * ! * ! * ! * ! * ! * ! * ! * ! * ! * ! * ! * ! * ! * ! * ! * ! * ! * ! * ! * ! * ! * ! * ! * ! * ! * ! * ! * ! * ! * ! * ! * ! * ! * ! * ! * ! * ! * ! * ! * ! * ! * ! * ! * ! * ! * ! * ! * ! * ! * ! * ! * ! * ! * ! * ! * ! * ! * ! * ! * ! * ! * ! * ! * ! * ! * ! * ! * ! * ! * ! * ! * ! * ! * ! * ! * ! * ! * ! * ! * ! * ! * ! * ! * ! * ! * ! * ! * ! * ! * ! * ! * ! * ! * ! * ! * ! * ! * ! * ! * ! * ! * ! * ! * ! * ! * ! * ! * ! * ! * ! * ! * ! * ! * ! * ! * ! * ! * ! * ! * ! * ! * ! * ! * ! * ! * ! * ! * ! * ! * ! * ! * ! * ! * ! * ! * ! * ! * ! * ! * ! * ! * ! * ! * ! * ! * ! * ! * ! * ! * ! * ! * ! * ! * ! * ! * ! * ! * ! * ! * ! * ! * ! * ! * ! * ! * ! * ! * ! * ! * ! * ! * ! * ! * ! * ! * ! * ! * ! * ! * ! * ! * ! * ! * ! * ! * ! * ! * ! * ! * ! * ! * ! * ! * ! * ! * ! * ! * ! * ! * ! * ! * ! * ! * ! * ! * ! * ! * ! * ! * ! * ! * ! * ! * ! * ! * ! * ! * ! * ! * ! * ! * ! * ! * ! * ! * ! * ! * ! * ! * ! * ! * ! * ! * ! * ! * ! * ! * ! * ! * ! * ! * ! * ! * ! * ! * ! * ! * ! * ! * ! * ! * ! * ! * ! * ! * ! * ! * ! * ! * ! * ! * ! * ! * ! * ! * ! * ! * ! * ! * ! * ! * ! * ! * ! * ! * ! * ! * ! * ! * ! * ! * ! * ! * ! * ! * ! * ! * ! * ! * ! * ! * ! * ! * ! * ! * ! * ! * ! * ! * ! * ! * ! * ! * ! * ! * ! * ! * ! * ! * ! * ! * ! * ! * ! * ! * ! * ! * ! * ! * ! * ! * ! * ! * ! * ! * ! * ! * ! * ! * ! * ! * ! * ! * ! * ! * ! * ! * ! * ! * ! * ! * ! * ! * ! * ! * ! * ! * ! * ! * ! * ! * ! * ! * ! * ! * ! * ! * ! * ! * ! * ! * ! * ! * ! * ! * ! * ! * ! * ! * ! * ! * ! * ! * ! * ! * ! * ! * ! * ! * ! * ! * ! * ! * ! * ! * ! * ! * ! * ! * ! * ! * ! * ! * ! * ! * ! * ! * ! * ! * ! * ! * ! * ! * ! * ! * ! * ! * ! * ! * ! * ! * ! * ! * ! * ! * ! * ! * ! * ! * ! * ! * ! * ! * ! * ! * ! * ! * ! * ! * ! * ! * ! * ! * ! * ! * ! * ! * ! * ! * ! * ! * ! * ! * ! * ! * ! * ! * ! * ! * ! * ! * ! * ! * ! * ! * ! * ! * ! * ! * ! * ! * ! * ! * ! * ! * ! * ! * ! * ! * ! * ! * ! * ! * ! * ! * ! * ! * ! * ! * ! * ! * ! * ! * ! * ! * ! * ! * ! * ! * ! * ! * ! * ! * ! * ! * ! * ! * ! * ! * ! * ! * ! * ! * ! * ! * ! * ! * ! * ! * ! * ! * ! * ! * ! * ! * ! * ! * ! * ! * ! * ! * ! * ! * ! * ! * ! * ! * ! * ! * ! * ! * ! * ! * ! * ! * ! * ! * ! * ! * ! * ! * ! * ! * ! * ! * ! * ! * ! * ! * ! * ! * ! * ! * ! * ! * ! * ! * ! * ! * ! * ! * ! * ! * ! * ! * ! * ! * ! * ! * ! * ! * ! * ! * ! * ! * ! * ! * ! * ! * ! * ! * ! * ! * ! * ! * ! * ! * ! * ! * ! * ! * ! * ! * ! * ! * ! * ! * ! * ! * ! * ! * ! * ! * ! * ! * ! * ! * ! * ! * ! * ! * ! * ! * ! * ! * ! * ! * ! * ! * ! * ! * ! * ! * ! * ! * ! * ! * ! * ! * ! * ! * ! * ! * ! * ! * ! * ! * ! * ! * ! * ! * ! * ! * ! * ! * ! * ! * ! * ! * ! * ! * ! * ! * ! * ! * ! * ! * ! * ! * ! * ! * ! * ! * ! * ! * ! * ! * ! * ! * ! * ! * ! * ! * ! * ! * ! * ! * ! * ! * ! * ! * ! * ! * ! * ! * ! * ! * ! * ! * ! * ! * ! * ! * ! * ! * ! * ! * ! * ! * ! * ! * ! * ! * ! * ! * ! * ! * ! * ! * ! * ! * ! * ! * ! * ! * ! * ! * ! * ! * ! * ! * ! * ! * ! * ! * ! * ! * ! * ! * ! * ! * ! * ! * ! * ! * ! * ! * ! * ! * ! * ! * ! * ! * ! * ! * ! * ! * ! * ! * ! * ! * ! * ! * ! * ! * ! * ! * ! * ! * ! * ! * ! * ! * ! * ! * ! * ! * ! * ! * ! * ! * ! * ! * ! * ! * ! * ! * ! * ! * ! * ! * ! * ! * ! * ! * ! * ! * ! * ! * ! * ! * ! * ! * ! * ! * ! * ! * ! * ! * ! * ! * ! * ! * ! * ! * ! * ! * ! * ! * ! * ! * ! * ! * ! * ! * ! * ! * ! * ! * ! * ! * ! * ! * ! * ! * ! * ! * ! * ! * ! * ! * ! * ! * ! * ! * ! * ! * ! * ! * ! * ! * ! * ! * ! * ! * ! * ! * ! * ! * ! * ! * ! * ! * ! * ! * ! * ! * ! * ! * ! * ! * ! * ! * ! * ! * ! * ! * ! * ! * ! * ! * ! * ! * ! * ! * ! * ! * ! * ! * ! * ! * ! * ! * ! * ! * ! * ! * ! * ! * ! * ! * ! * ! * ! * ! * ! * ! * ! * ! * ! * ! * ! * ! * ! * ! * ! * ! * ! * ! * ! * ! * ! * ! * ! * ! * ! * ! * ! * ! * ! * ! * ! * ! * ! * ! * ! * ! * ! * ! * ! * ! * ! * ! * ! * ! * ! * ! * ! * ! * ! * ! * ! * ! * ! * ! * ! * ! * ! * ! * ! * ! * ! * ! * ! * ! * ! * ! * ! * ! * ! * ! * ! * ! * ! * ! * ! * ! * ! * ! * ! * ! * ! * ! * ! * ! * ! * ! * ! * ! * ! * ! * ! * ! * ! * ! * ! * ! * ! * ! * ! * ! * ! * ! * ! * ! * ! * ! * ! * ! * ! * ! * ! * ! * ! * ! * ! * ! * ! * ! * ! * ! * ! * ! * ! * ! * ! * ! * ! * ! * ! * ! * ! * ! * ! * ! * ! * ! * ! * ! * ! * ! * ! * ! * ! * ! * ! * ! * ! * ! * ! * ! * ! * ! * ! * ! * ! * ! * ! * ! * ! * ! * ! * ! * ! * ! * ! * ! * ! * ! * ! * ! * ! * ! * ! * ! * ! * ! * ! * ! * ! * ! * ! * ! * ! * ! * ! * ! * ! * ! * ! * ! * ! * ! * ! * ! * ! * ! * ! * ! * ! * ! * ! * ! * ! * ! * ! * ! * ! * ! * ! * ! * ! * ! * ! * ! * ! * ! * ! * ! * ! * ! * ! * ! * ! * ! * ! * ! * ! * ! * ! * ! * ! * ! * ! * ! * ! * ! * ! * ! * ! * ! * ! * ! * ! * ! * ! * ! * ! * ! * ! * ! * ! * ! * ! * ! * ! * ! * ! * ! * ! * ! * ! * ! * ! * ! * ! * ! * ! * ! * ! * ! * ! * ! * ! * ! * ! * ! * ! * ! * ! * ! * ! * ! * ! * ! * ! * ! * ! * ! * ! * ! * ! * ! * ! * ! * ! * ! * ! * ! * ! * ! * ! * ! * ! * ! * ! * ! * ! * ! * ! * ! * ! * ! * ! * ! * ! * ! * ! * ! * ! * ! * ! * ! * ! * ! * ! * ! * ! * ! * ! * ! * ! * ! * ! * ! * ! * ! * ! * ! * ! * ! * ! * ! * ! * ! * ! * ! * ! * ! * ! * ! * ! * ! * ! * ! * ! * ! * ! * ! * ! * ! * ! * ! * ! * ! * ! * ! * ! * ! * ! * ! * ! * ! * ! * ! * ! * ! * ! * ! * ! * ! * ! * ! * ! * ! * ! * ! * ! * ! * ! * ! * ! * ! * ! * ! * ! * ! * ! * ! * ! * ! * ! * ! * ! * ! * ! * ! * ! * ! * ! * ! * ! * ! * ! * ! * ! * ! * ! * ! * ! * ! * ! * ! * ! * ! * ! * ! * ! * ! * ! * ! * ! * ! * ! * ! * ! * ! * ! * ! * ! * ! * ! * ! * ! * ! * ! * ! * ! * ! * ! * ! * ! * ! * ! * ! * ! * ! * ! * ! * ! * ! * ! * ! * ! * ! * ! * ! * ! * ! * ! * ! * ! * ! * ! * ! * ! * ! * ! * ! * ! * ! * ! * ! * ! * ! * ! * ! * ! * ! * ! * ! * ! * ! * ! * ! * ! * ! * ! * ! * ! * ! * ! * ! * ! * ! * ! * ! * ! * ! * ! * ! * ! * ! * ! * ! * ! * ! * ! * ! * ! * ! * ! * ! * ! * ! * ! * ! * ! * ! * ! * ! * ! * ! * ! * ! * ! * ! * ! * ! * ! * ! * ! * ! * ! * ! * ! * ! * ! * ! * ! * ! * ! * ! * ! * ! * ! * ! * ! * ! * ! * ! * ! * ! * ! * ! * ! * ! * ! * ! * ! * ! * ! * ! * ! * ! * ! * ! * ! * ! * ! * ! * ! * ! * ! * ! * ! * ! * ! * ! * ! * ! * ! * ! * ! * ! * ! * ! * ! * ! * ! * ! * ! * ! * ! * ! * ! * ! * ! * ! * ! * ! * ! * ! * ! * ! * ! * ! * ! * ! * ! * ! * ! * ! * ! * ! * ! * ! * ! * ! * ! * ! * ! * ! * ! * ! * ! * ! * ! * ! * ! * ! * ! * ! * ! * ! * ! * ! * ! * ! * ! * ! * ! * ! * ! * ! * ! * ! * ! * ! * ! * ! * ! * ! * ! * ! * ! * ! * ! * ! * ! * ! * ! * ! * ! * ! * ! * ! * ! * ! * ! * ! * ! * ! * ! * ! * ! * ! * ! * ! * ! * ! * ! * ! * ! * ! * ! * ! * ! * ! * ! * ! * ! * ! * ! * ! * ! * ! * ! * ! * ! * ! * ! * ! * ! * ! * ! * ! * ! * ! * ! * ! * ! * ! * ! * ! * ! * ! * ! * ! * ! * ! * ! * ! * ! * ! * ! * ! * ! * ! * ! * ! * ! * ! * ! * ! * ! * ! * ! * ! * ! * ! * ! * ! * ! * ! * ! * ! * ! * ! * ! * ! * ! * ! * ! * ! * ! * ! * ! * ! * ! * ! * ! * ! * ! * ! * ! * ! * ! * ! * ! * ! * ! * ! * ! * ! * ! * ! * ! * ! * ! * ! * ! * ! * ! * ! * ! * ! * ! * ! * ! * ! * ! * ! * ! * ! * ! * ! * ! * ! * ! * ! * ! * ! * ! * ! * ! * ! * ! * ! * ! * ! * ! * ! * ! * ! * ! * ! * ! * ! * ! * ! * ! * ! * ! * ! * ! * ! * ! * ! * ! * ! * ! * ! * ! * ! * ! * ! * ! * ! * ! * ! * ! * ! * ! * ! * ! * ! * ! * ! * ! * ! * ! * ! * ! * ! * ! * ! * ! * ! * ! * ! * ! * ! * ! * ! * ! * ! * ! * ! * ! * ! * ! * ! * ! * ! * ! * ! * ! * ! * ! * ! * ! * ! * ! * ! * ! * ! * ! * ! * ! * ! * ! * ! * ! * ! * ! * ! * ! * ! * ! * ! * ! * ! * ! * ! * ! * ! * ! * ! * ! * ! * ! * ! * ! * ! * ! * ! * ! * ! * ! * ! * ! * ! * ! * ! * ! * ! * ! * ! * ! * ! * ! * ! * ! * ! * ! * ! * ! * ! * ! * ! * ! * ! * ! * ! * ! * ! * ! * ! * ! * ! * ! * ! * ! * ! * ! * ! * ! * ! * ! * ! * ! * ! * ! * ! * ! * ! * ! * ! * ! * ! * ! * ! * ! * ! * ! * ! * ! * ! * ! * ! * ! * ! * ! * ! * ! * ! * ! * ! * ! * ! * ! * ! * ! * ! * ! * ! * ! * ! * ! * ! * ! * ! * ! * ! * ! * ! * ! * ! * ! * ! * ! * ! * ! * ! * ! * ! * ! * ! * ! * ! * ! * ! * ! * ! * ! * ! * ! * ! * ! * ! * ! * ! * ! * ! * ! * ! * ! * ! * ! * ! * ! * ! * ! * ! * ! * ! * ! * ! * ! * ! * ! * ! * ! * ! * ! * ! * ! * ! * ! * ! * ! * ! * ! * ! * ! * ! * ! * ! * ! * ! * ! * ! * ! * ! * ! * ! * ! * ! * ! * ! * ! * ! * ! * ! * ! * ! * ! * ! * ! * ! * ! * ! * ! * ! * ! * ! * ! * ! * ! * ! * ! * ! * ! * ! * ! * ! * ! * ! * ! * ! * ! * ! * ! * ! * ! * ! * ! * ! * ! * ! * ! * ! * ! * ! * ! * ! * ! * ! * ! * ! * ! * ! * ! * ! * ! * ! * ! * ! * ! * ! * ! * ! * ! * ! * ! * ! * ! * ! * ! * ! * ! * ! * ! * ! * ! * ! * ! * ! * ! * ! * ! * ! * ! * ! * ! * ! * ! * ! * ! * ! * ! * ! * ! * ! * ! * ! * ! * ! * ! * ! * ! * ! * ! * ! * ! * ! * ! * ! * ! * ! * ! * ! * ! * ! * ! * ! * ! * ! * ! * ! * ! * ! * ! * ! * ! * ! * ! * ! * ! * ! * ! * ! * ! * ! * ! * ! * ! * ! * ! * ! * ! * ! * ! * ! * ! * ! * ! * ! * ! * ! * ! * ! * ! * ! * ! * ! * ! * ! * ! * ! * ! * ! * ! * ! * ! * ! * ! * ! * ! * ! * ! * ! * ! * ! * ! * ! * ! * ! * ! * ! * ! * ! * ! * ! * ! * ! * ! * ! * ! * ! * ! * ! * ! * ! * ! * ! * ! * ! * ! * ! * ! * ! * ! * ! * ! * ! * ! * ! * ! * ! * ! * ! * ! * ! * ! * ! * ! * ! * ! * ! * ! * ! * ! * ! * ! * ! * ! * ! * ! * ! * ! * ! * ! * ! * ! * ! * ! * ! * ! * ! * ! * ! * ! * ! * ! * ! * ! * ! * ! * ! * ! * ! * ! * ! * ! * ! * ! * ! * ! * ! * ! * ! * ! * ! * ! * ! * ! * ! * ! * ! * ! * ! * ! * ! * ! * ! * ! * ! * ! * ! * ! * ! * ! * ! * ! * ! * ! * ! * ! * ! * ! * ! * ! * ! * ! * ! * ! * ! * ! * ! * ! * ! * ! * ! * ! * ! * ! * ! * ! * ! * ! * ! * ! * ! * ! * ! * ! * ! * ! * ! * ! * ! * ! * ! * ! * ! * ! * ! * ! * ! * ! * ! * ! * ! * ! * ! * ! * ! * ! * ! * ! * ! * ! * ! * ! * ! * ! * ! * ! * ! * ! * ! * ! * ! * ! * ! * ! * ! * ! * ! * ! * ! * ! * ! * ! * ! * ! * ! * ! * ! * ! * ! * ! * ! * ! * ! * ! * ! * ! * ! * ! * ! * ! * ! * ! * ! * ! * ! * ! * ! * ! * ! * ! * ! * ! * ! * ! * ! * ! * ! * ! * ! * ! * ! * ! * ! * ! * ! * ! * ! * ! * ! * ! * ! * ! * ! * ! * ! * ! * ! * ! * ! * ! * ! * ! * ! * ! * ! * ! * ! * ! * ! * ! * ! * ! * ! * ! * ! * ! * ! * ! * ! * ! * ! * ! * ! * ! * ! * ! * ! * ! * ! * ! * ! * ! * ! * ! * ! * ! * ! * ! * ! * ! * ! * ! * ! * ! * ! * ! * ! * ! * ! * ! * ! * ! * ! * ! * ! * ! * ! * ! * ! * ! * ! * ! * ! * ! * ! * ! * ! * ! * ! * ! * ! * ! * ! * ! * ! * ! * ! * ! * ! * ! * ! * ! * ! * ! * ! * ! * ! * ! * ! * ! * ! * ! * ! * ! * ! * ! * ! * ! * ! * ! * ! * ! * ! * ! * ! * ! * ! * ! * ! * ! * ! * ! * ! * ! * ! * ! * ! * ! * ! * ! * ! * ! * ! * ! * ! * ! * ! * ! * ! * ! * ! * ! * ! * ! * ! * ! * ! * ! * ! * ! * ! * ! * ! * ! * ! * ! * ! * ! * ! * ! * ! * ! * ! * ! * ! * ! * ! * ! * ! * ! * ! * ! * ! * ! * ! * ! * ! * ! * ! * ! * ! * ! * ! * ! * ! * ! * ! * ! * ! * ! * ! * ! * ! * ! * ! * ! * ! * ! * ! * ! * ! * ! * ! * ! * ! * ! * ! * ! * ! * ! * ! * ! * ! * ! * ! * ! * ! * ! * ! * ! * ! * ! * ! * ! * ! * ! * ! * ! * ! * ! * ! * ! * ! * ! * ! * ! * ! * ! * ! * ! * ! * ! * ! * ! * ! * ! * ! * ! * ! * ! * ! * ! * ! * ! * ! * ! * ! * ! * ! * ! * ! * ! * ! * ! * ! * ! * ! * ! * ! * ! * ! * ! * ! * ! * ! * ! * ! * ! * ! * ! * ! * ! * ! * ! * ! * ! * ! * ! * ! * ! * ! * ! * ! * ! * ! * ! * ! * ! * ! * ! * ! * ! * ! * ! * ! * ! * ! * ! * ! * ! * ! * ! * ! * ! * ! * ! * ! * ! * ! * ! * ! * ! * ! * ! * ! * ! * ! * ! * ! * ! * ! * ! * ! * ! * ! * ! * ! * ! * ! * ! * ! * ! * ! * ! * ! * ! * ! * ! * ! * ! * ! * ! * ! * ! * ! * ! * ! * ! * ! * ! * ! * ! * ! * ! * ! * ! * ! * ! * ! * ! * ! * ! * ! * ! * ! * ! * ! * ! * ! * ! * ! * ! * ! * ! * ! * ! * ! * ! * ! * ! * ! * ! * ! * ! * ! * ! * ! * ! * ! * ! * ! * ! * ! * ! * ! * ! * ! * ! * ! * ! * ! * ! * ! * ! * ! * ! * ! * ! * ! * ! * ! * ! * ! * ! * ! * ! * ! * ! * ! * ! * ! * ! * ! * ! * ! * ! * ! * ! * ! * ! * ! * ! * ! * ! * ! * ! * ! * ! * ! * ! * ! * ! * ! * ! * ! * ! * ! * ! * ! * ! * ! * ! * ! * ! * ! * ! * ! * ! * ! * ! * ! * ! * ! * ! * ! * ! * ! * ! * ! * ! * ! * ! * ! * ! * ! * ! * ! * ! * ! * ! * ! * ! * ! * ! * ! * ! * ! * ! * ! * ! * ! * ! * ! * ! * ! * ! * ! * ! * ! * ! * ! * ! * ! * ! * ! * ! * ! * ! * ! * ! * ! * ! * ! * ! * ! * ! * ! * ! * ! * ! * ! * ! * ! * ! * ! * ! * ! * ! * ! * ! * ! * ! * ! * ! * ! * ! * ! * ! * ! * ! * ! * ! * ! * ! * ! * ! * ! * ! * ! * ! * ! * ! * ! * ! * ! * ! * ! * ! * ! * ! * ! * ! * ! * ! * ! * ! * ! * ! * ! * ! * ! * ! * ! * ! * ! * ! * ! * ! * ! * ! * ! * ! * ! * ! * ! * ! * ! * ! * ! * ! * ! * ! * ! * ! * ! * ! * ! * ! * ! * ! * ! * ! * ! * ! * ! * ! * ! * ! * ! * ! * ! * ! * ! * ! * ! * ! * ! * ! * ! * ! * ! * ! * ! * ! * ! * ! * ! * ! * ! * ! * ! * ! * ! * ! * ! * ! * ! * ! * ! * ! * ! * ! * ! * ! * ! * ! * ! * ! * ! * ! * ! * ! * ! * ! * ! * ! * ! * ! * ! * ! * ! * ! * ! * ! * ! * ! * ! * ! * ! * ! * ! * ! * ! * ! * ! * ! * ! * ! * ! * ! * ! * ! * ! * ! * ! * ! * ! * ! * ! * ! * ! * ! * ! * ! * ! * ! * ! * ! * ! * ! * ! * ! * ! * ! * ! * ! * ! * ! * ! * ! * ! * ! * ! * ! * ! * ! * ! * ! * ! * ! * ! * ! * ! * ! * ! * ! * ! * ! * ! * ! * ! * ! * ! * ! * ! * ! * ! * ! * ! * ! * ! * ! * ! * ! * ! * ! * ! * ! * ! * ! * ! * ! * ! * ! * ! * ! * ! * ! * ! * ! * ! * ! * ! * ! * ! * ! * ! * ! * ! * ! * ! * ! * ! * ! * ! * ! * ! * ! * ! * ! * ! * ! * ! * ! * ! * ! * ! * ! * ! * ! * ! * ! * ! * ! * ! * ! * ! * ! * ! * ! * ! * ! * ! * ! * ! * ! * ! * ! * ! * ! * ! * ! * ! * ! * ! * ! * ! * ! * ! * ! * ! * ! * ! * ! * ! * ! * ! * ! * ! * ! * ! * ! * ! * ! * ! * ! * ! * ! * ! * ! * ! * ! * ! * ! * ! * ! * ! * ! * ! * ! * ! * ! * ! * ! * ! * ! * ! * ! * ! * ! * ! * ! * ! * ! * ! * ! * ! * ! * ! * ! * ! * ! * ! * ! * ! * ! * ! * ! * ! * ! * ! * ! * ! * ! * ! * ! * ! * ! * ! * ! * ! * ! * ! * ! * ! * ! * ! * ! * ! * ! * ! * ! * ! * ! * ! * ! * ! * ! * ! * ! * ! * ! * ! * ! * ! * ! * ! * ! * ! * ! * ! * ! * ! * ! * ! * ! * ! * ! * ! * ! * ! * ! * ! * ! * ! * ! * ! * ! * ! * ! * ! * ! * ! * ! * ! * ! * ! * ! * ! * ! * ! * ! * ! * ! * ! * ! * ! * ! * ! * ! * ! * ! * ! * ! * ! * ! * ! * ! * ! * ! * ! * ! * ! * ! * ! * ! * ! * ! * ! * ! * ! * ! * ! * ! * ! * ! * ! * ! * ! * ! * ! * ! * ! * ! * ! * ! * ! * ! * ! * ! * ! * ! * ! * ! * ! * ! * ! * ! * ! * ! * ! * ! * ! * ! * ! * ! * ! * ! * ! * ! * ! * ! * ! * ! * ! * ! * ! * ! * ! * ! * ! * ! * ! * ! * ! * ! * ! * ! * ! * ! * ! * ! * ! * ! * ! * ! * ! * ! * ! * ! * ! * ! * ! * ! * ! * ! * ! * ! * ! * ! * ! * ! * ! * ! * ! * ! * ! * ! * ! * ! * ! * ! * ! * ! * ! * ! * ! * ! * ! * ! * ! * ! * ! * ! * ! * ! * ! * ! * ! * ! * ! * ! * ! * ! * ! * ! * ! * ! * ! * ! * ! * ! * ! * ! * ! * ! * ! * ! * ! * ! * ! * ! * ! * ! * ! * ! * ! * ! * ! * ! * ! * ! * ! * ! * ! * ! * ! * ! * ! * ! * ! * ! * ! * ! * ! * ! * ! * ! * ! * ! * ! * ! * ! * ! * ! * ! * ! * ! * ! * ! * ! * ! * ! * ! * ! * ! * ! * ! * ! * ! * ! * ! * ! * ! * ! * ! * ! * ! * ! * ! * ! * ! * ! * ! * ! * ! * ! * ! * ! * ! * ! * ! * ! * ! * ! * ! * ! * ! * ! * ! * ! * ! * ! * ! * ! * ! * ! * ! * ! * ! * ! * ! * ! * ! * ! * ! * ! * ! * ! * ! * ! * ! * ! * ! * ! * ! * ! * ! * ! * ! * ! * ! * ! * ! * ! * ! * ! * ! * ! * ! * ! * ! * ! * ! * ! * ! * ! * ! * ! * ! * ! * ! * ! * ! * ! * ! * ! * ! * ! * ! * ! * ! * ! * ! * ! * ! * ! * ! * ! * ! * ! * ! * ! * ! * ! * ! * ! * ! * ! * ! * ! * ! * ! * ! * ! * ! * ! * ! * ! * ! * ! * ! * ! * ! * ! * ! * ! * ! * ! * ! * ! * ! * ! * ! * ! * ! * ! * ! * ! * ! * ! * ! * ! * ! * ! * ! * |     |     |     |     |     |     |     |     |     |     |     |     |     |     |     |  |





|               |            |             |                 |       |            |           |              |             |             |             |       |       |       |       |       |      |
|---------------|------------|-------------|-----------------|-------|------------|-----------|--------------|-------------|-------------|-------------|-------|-------|-------|-------|-------|------|
| conservation  | 1105       | 1110        | 1115            | 1120  | 1125       | 1130      | 1135         | 1140        | 1145        | 1150        | 1155  | 1160  | 1165  | 1170  | 1175  |      |
| SPARCI1`CI    | *****      | *****       | *****           | ***** | *****      | *****     | *****        | *****       | *****       | *****       | ***** | ***** | ***** | ***** | ***** | 1178 |
| SPARCI1`DR    | ATTAGGGCCA | CTATGGAGCT  | TTTACCCTGAC     | ..... | ATTTCGA    | CCTACCCAT | TCGGCCCAGT   | TGACAGGGGG  | TGCCAGCTGA  |             |       |       |       |       |       | 1115 |
| SPARCI1`IP    | TTCAGGGCTG | CAGTGGATC   | TTTTCCCAAA      | ..... | AAGAATTT   | CACGTGTG  | CATATGTACATG | TAATCAT     | TATATCCAGA  |             |       |       |       |       |       | 1136 |
| SPARCI1`LW    | ATTAGGGCCA | CTATGGAGCT  | TTTACCCTGAC     | ..... | ATTTCG     | CCCACA    | CATCGGGCCAG  | CAGACAGGGGG | GAGCCAGCTGA |             |       |       |       |       |       | 1178 |
| SPARCI1`PN    | ATTTCGGGCA | ACAGTGGAGCT | GTTC            | CC    | CAGACCTGTG | GT        | CAGGTCCAGAC  | TCGGAG      | CGACGG      | CCAGGAAGCT  | CC    | CG    | CCGA  |       |       | 1106 |
| SPARCI1`PP    | ATTAGGGCCA | CTATGGAGCT  | TTTACCCTGAC     | ..... | ATTTCG     | CCCAG     | CAGA         | .....       | CAGGGG      | GAGCCAGCTGA |       |       |       |       |       | 1130 |
| SPARCI1-AM    | .....      | .....       | .....           | ..... | .....      | .....     | .....        | .....       | .....       | .....       | ..... | ..... | ..... | ..... | ..... | 1041 |
| SPARCI1-C1`CC | ATCAGGGCCG | CTATGGAGCT  | TTTACCCTGAC     | ..... | ATTTCGA    | CCCACCC   | ATCGGGCCCAG  | CGGACAGGGGG | TTGTCAGATGA |             |       |       |       |       |       | 1151 |
| SPARCI1-C2`CC | ATTAGGGCCA | CTATGGAGCT  | TTTACCCTGAC     | ..... | ATTTCGA    | CCCACCCG  | TGGCCCAGT    | TGACAGGGGG  | TTACCAGTTGA |             |       |       |       |       |       | 1175 |
| SPARCI1-C1`SG | ATCAGGGCCG | CTATGGAGCT  | TTTACCCTGAC     | ..... | ATTTCGA    | CCCACCC   | ATCGGGCCCAGT | TGACAGGGGG  | TTGCCAGATGA |             |       |       |       |       |       | 1169 |
| SPARCI1-C2`SG | ATTAGGGCCA | CTATGGAGCT  | TTTACCCTGAC     | ..... | ATTTCGA    | CCCACCC   | ATCGGGCCCAGT | TGACAGGGGG  | TTGCCAGCTGA |             |       |       |       |       |       | 1169 |
| SPARCI1-C1`SA | ATCAGGGCCG | CTATGGAGCT  | TTTACCCTGAC     | ..... | ATTTCGA    | CCCACCC   | ATCGGGCCCAGT | TGACAGGGGG  | TCGT        | CAGATGA     |       |       |       |       |       | 1169 |
| SPARCI1-C2`SA | ATTAGGGCCG | CTATGGAGCT  | TTTACCCTGAC     | ..... | ATTTCGA    | CCCACCC   | ATCGGGCCCAGT | TGACAGGGGG  | TTGCCAGCTGA |             |       |       |       |       |       | 1187 |
| SPARCI1-C1`SR | ATCAGGGCCG | CTATGGAGCT  | TTTACCCTGAC     | ..... | ATTTCGA    | CCCACCC   | ATCGGGCCCAGT | TGACAGGGGG  | TTGCCAGATGA |             |       |       |       |       |       | 1148 |
| SPARCI1-C2`SR | ATTAGGGCCA | CTATGA      | AAGCTTTACCCTGAC | ..... | ATTTCGA    | CCCACCC   | ATCGGCA      | CAGT        | TGACAGGGGG  | TTGCCAGCTGA |       |       |       |       |       | 1157 |

|               |         |           |         |       |       |          |           |         |             |           |                 |                 |       |       |       |       |      |
|---------------|---------|-----------|---------|-------|-------|----------|-----------|---------|-------------|-----------|-----------------|-----------------|-------|-------|-------|-------|------|
| conservation  | 1180    | 1185      | 1190    | 1195  | 1200  | 1205     | 1210      | 1215    | 1220        | 1225      | 1230            | 1235            | 1240  | 1245  | 1250  | 1255  |      |
| SPARCI1`CI    | *****   | *****     | *****   | ***** | ***** | *****    | *****     | *****   | *****       | *****     | *****           | *****           | ***** | ***** | ***** | ***** | 1258 |
| SPARCI1`DR    | CCCCTGT | GAGAACTTT | CGCTGT  | AAAA  | GAGG  | GAAGACAT | GCAAAAT   | AAAT    | GATGAGAACA  | AA        | CCCGTCTGTGTGTGT | GCAGG           |       |       |       |       | 1195 |
| SPARCI1`IP    | CTCATGT | GAGAACTT  | CCACTGT | AA    | GC    | GAGG     | GAAGACAT  | GCAAGCT | GAA         | CGATAT    | GAAGAAG         | CCCAGCTGTGTGTGT | GCAGG |       |       |       | 1216 |
| SPARCI1`LW    | CCCTTGT | GAGAACTTT | CGCTGT  | AAAA  | GAGG  | GAAGACAT | GCAAAAT   | GAA     | CGATGAGAACA | AA        | CCCGTCTGTGTGTGT | GCAGG           |       |       |       |       | 1258 |
| SPARCI1`PN    | CCCATGT | GAGAACTT  | CCACTGT | AA    | GC    | GAGG     | GAAGACAT  | GCAAACT | GAA         | CGAAGAACA | GAA             | CCAACTTGTGTGTGT | GC    | AA    | G     |       | 1186 |
| SPARCI1`PP    | CCCCTGT | GAGAACTTT | CGCTGT  | AAAA  | GAGG  | GAAGACAT | GCAAAAT   | GAA     | CGATGAGAACA | AA        | CCCGTCTGTGTGTGT | GCAGG           |       |       |       |       | 1210 |
| SPARCI1-AM    | .....   | .....     | .....   | ..... | ..... | .....    | .....     | .....   | .....       | .....     | .....           | .....           | ..... | ..... | ..... | ..... | 1041 |
| SPARCI1-C1`CC | CCCCTGC | GAGAACTTT | CGCTGT  | AAAA  | GAGG  | AAAGAC   | GTGCAAAAT | GAA     | TGATGAGAACA | AA        | CC              | TGTCTGTGTGTGT   | GCAGG |       |       |       | 1231 |
| SPARCI1-C2`CC | CCCCTGT | GAGAACTTT | CGCTGT  | AAAA  | GAGG  | GAAGACAT | GCAAAAT   | GAA     | CGATGAGAACA | AA        | CCCGTCTGTGTGTGT | GCAGG           |       |       |       |       | 1255 |
| SPARCI1-C1`SG | CCCCTGT | GAGAACTTT | CGCTGT  | AAAA  | GAGG  | AAAGACAT | GCAAAAT   | GAA     | TGATGAGAACA | AA        | CCCGTCTGTGTGTGT | GCAGG           |       |       |       |       | 1249 |
| SPARCI1-C2`SG | CCCCTGC | GAGAACTTT | CGCTGT  | AAAA  | GAGG  | GAAGACAT | GCAAAAT   | GAA     | CGATGA      | CAACAAG   | CCCGTCTGTGTGTGT | GCAGG           |       |       |       |       | 1249 |
| SPARCI1-C1`SA | CCCCTGC | GAGAACTTT | CGCTGT  | AAAA  | GAGG  | AAAGACAT | GCAAAAT   | GAA     | TGATGAGAACA | AA        | CCCGTCTGTGTGTGT | GCAGG           |       |       |       |       | 1249 |
| SPARCI1-C2`SA | CCCCTGC | GAGAGCTTT | CGCTGT  | AAAA  | GAGG  | GAAGACAT | GCAAAAT   | GAA     | CGATGAGT    | TACAAG    | CCCGTCTGTGTGTGT | GCAGG           |       |       |       |       | 1267 |
| SPARCI1-C1`SR | CCCCTGC | GAGAACTTT | CGCTGT  | AAAA  | GAGG  | AAAGACAT | GCAAAAT   | GAA     | TGATGAGAACA | AA        | CCCGTCTGTGTGTGT | GCAGG           |       |       |       |       | 1228 |
| SPARCI1-C2`SR | CCCCTGC | GAGAACTTT | CGCTGT  | AAAA  | GAGG  | GAAGACAT | GCAAAAT   | GAA     | CGAG        | GAGAACAAG | CCCGTCTGTGTGTGT | GCAGG           |       |       |       |       | 1237 |

|               |         |          |       |          |        |         |         |        |        |            |            |           |           |         |         |       |      |
|---------------|---------|----------|-------|----------|--------|---------|---------|--------|--------|------------|------------|-----------|-----------|---------|---------|-------|------|
| conservation  | 1260    | 1265     | 1270  | 1275     | 1280   | 1285    | 1290    | 1295   | 1300   | 1305       | 1310       | 1315      | 1320      | 1325    | 1330    | 1335  |      |
| SPARCI1`CI    | *****   | *****    | ***** | *****    | *****  | *****   | *****   | *****  | *****  | *****      | *****      | *****     | *****     | *****   | *****   | ***** | 1338 |
| SPARCI1`DR    | AGCCGTC | GAGAATGT | CCTCC | CC       | CAGTGT | AAAC    | GATTTTG | AC     | CATGTA | TGCGGA     | ACTGACAATA | AAGACATAT | GACACAT   | CCTGT   |         |       | 1275 |
| SPARCI1`IP    | ATCCTGC | CAGACTGT | CCTCC | AGGTCT   | CAGT   | GAGTTTG | AC      | CATGT  | TGT    | TGGAAC     | AGATAA     | CCAGACTT  | TATGACT   | CATA    | ACTGC   |       | 1296 |
| SPARCI1`LW    | AGCCGTC | GAGAATGT | CCTCC | CAGTGT   | AAAT   | GATTTTG | AC      | CATGTT | TGCGGA | ACTGACAATA | AAGACATAT  | GACACAT   | CCTGT     |         |         |       | 1338 |
| SPARCI1`PN    | AACTGC  | CAGACTGT | CCTCC | AAGTGT   | CGCTG  | AA      | TTTG    | AC     | CATGT  | TGT        | TGGAAC     | AGACA     | CCAGACATA | CGACA   | CTCCTGC |       | 1266 |
| SPARCI1`PP    | AGCCGTC | GAGAATGT | CCTCC | CAGTGT   | AAAT   | GATTTTG | AC      | CATGT  | T      | TGCGGA     | ACTGACAATA | AAGACATAT | GACACAT   | CCTGT   |         |       | 1290 |
| SPARCI1-AM    | .....   | .....    | ..... | .....    | .....  | .....   | .....   | .....  | .....  | .....      | .....      | .....     | .....     | .....   | .....   | ..... | 1041 |
| SPARCI1-C1`CC | AGCCGTC | GAGAATGT | CCTCT | CAGTGT   | AAAT   | GATTTTG | AC      | CATGTA | TGT    | TGGAAC     | AGACAATA   | AAGACATAT | GACACAT   | CCTGT   |         |       | 1311 |
| SPARCI1-C2`CC | AGCCGTC | GAGAATGT | CCTCC | CAGTGT   | AAAT   | GATTT   | AG      | AC     | CATGTA | TGCGGA     | AC         | AGACAATA  | AAGACATAT | GACACAT | CCTGT   |       | 1335 |
| SPARCI1-C1`SG | AGCCAT  | CAGAATGT | CCT   | ACCAGTGT | AAAT   | GATTTTG | AC      | CATGTA | TGT    | TGGAAC     | AGACAATA   | AAGACATAT | GACACAT   | CCTGT   |         |       | 1329 |
| SPARCI1-C2`SG | AGCCGTC | GAGAATGT | CCTCC | CAGTGT   | AAAT   | GATTT   | AG      | AC     | CATGTA | TGCGGA     | ACTGACAATA | AAGACATAT | GACACAT   | CCTGT   |         |       | 1329 |
| SPARCI1-C1`SA | AGCCGTC | GAGAATGT | CCT   | ACCAGTGT | AAAT   | GATTTTG | AC      | CATGTA | TGCGGA | ACTGACAATA | AAGACATAT  | GACACAT   | CCTGT     |         |         |       | 1329 |
| SPARCI1-C2`SA | AGCCGTC | GAGAATGT | CCTCC | CAGTGT   | AAAT   | GATTT   | AG      | AC     | CATGTA | TGCGGA     | ACTGACAATA | AAGACATAT | GACACAT   | CCTGT   |         |       | 1347 |
| SPARCI1-C1`SR | AGCCGTC | GAGAATGT | CCT   | ACCAGTGT | AAAT   | GATTTTG | AC      | CATGTA | TGCGGA | ACTGACAATA | AAGACATAT  | GACACAT   | CCTGT     |         |         |       | 1308 |
| SPARCI1-C2`SR | AGCCGTC | GAGAATGT | CCTCC | CAGTGT   | AAAT   | GATTT   | AG      | AC     | CATGTA | TGCGGA     | ACTGACAATA | AAGACATAT | GACACAT   | CCTGT   |         |       | 1317 |

|               |         |            |                 |            |            |            |            |             |               |            |          |       |       |       |       |       |      |
|---------------|---------|------------|-----------------|------------|------------|------------|------------|-------------|---------------|------------|----------|-------|-------|-------|-------|-------|------|
| conservation  | 1340    | 1345       | 1350            | 1355       | 1360       | 1365       | 1370       | 1375        | 1380          | 1385       | 1390     | 1395  | 1400  | 1405  | 1410  | 1415  |      |
| SPARCI1`CI    | *****   | *****      | *****           | *****      | *****      | *****      | *****      | *****       | *****         | *****      | *****    | ***** | ***** | ***** | ***** | ***** | 1418 |
| SPARCI1`DR    | CAGCTCT | TTTGCCAC   | GAAAGTGT        | GGTCTT     | GAT        | TGGAACCA   | AAATAGG    | CCACAGACTT  | CACTGGAC      | TACACTGGAT | CCTGT    | TAA   |       |       |       |       | 1355 |
| SPARCI1`IP    | CACCTTT | TTTGCT     | TACCAAGTGT      | GGTCTT     | GAGGGA     | ACCAAA     | ATTAGGT    | CACAGGCTT   | CACTGGAC      | TACACTGGAT | CA       | TGCAA |       |       |       |       | 1376 |
| SPARCI1`LW    | CAGCTCT | TTTGCCAC   | CAAGTGT         | AGCCTTG    | ACGGGACCA  | AAATAGG    | CCACAGACTT | CACCTGGAC   | TACACTGGG     | TCCTGCAA   |          |       |       |       |       |       | 1418 |
| SPARCI1`PN    | CAGCTCT | TTTGCCAC   | CAAGTGT         | GGCCTTG    | AGGGGACCA  | AA         | GAAAGGT    | CACAA       | ACTGCACCTGGAC | TACACAGGCT | CCTGCAA  |       |       |       |       |       | 1346 |
| SPARCI1`PP    | CAGCTCT | TTTGCCAC   | CAAGTGT         | AGTCTT     | GACGGGACCA | AA         | GTAGG      | CCACAGACTT  | CACTGGAC      | TACTCTGGG  | TCCTGCAA |       |       |       |       |       | 1370 |
| SPARCI1-AM    | .....   | .....      | .....           | .....      | .....      | .....      | .....      | .....       | .....         | .....      | .....    | ..... | ..... | ..... | ..... | ..... | 1041 |
| SPARCI1-C1`CC | CAGCTTT | TTTGCCACCA | AGTGTGGCCTT     | GAGGGGACCA | AAATAGG    | CCACAGACTT | CACCTGGAT  | TACACTGGAT  | CCTGCAA       |            |          |       |       |       |       |       | 1391 |
| SPARCI1-C2`CC | CAGCTCT | TTTGCA     | ACCAAGTGTGGCCTT | GAGGGGAC   | AAATAGG    | CCACAGACTT | CACCTGGA   | ATACACTGGAT | CCTGCAA       |            |          |       |       |       |       |       | 1415 |
| SPARCI1-C1`SG | CAGCTTT | TTTGCCACCA | AGTGTGGCCTT     | GAGGGGACCA | AAATAGG    | CCACAGACTT | CACCTGGAT  | TACACTGGAT  | CCTGCAA       |            |          |       |       |       |       |       | 1409 |
| SPARCI1-C2`SG | CAGCTCT | TTTGCCACCA | AGTGTGGCCTT     | GAGGGGACCA | AAATAGG    | CCACAGACTT | CACCTGGAT  | TACACTGGAT  | CCTGCAA       |            |          |       |       |       |       |       | 1409 |
| SPARCI1-C1`SA | CAGCTTT | TTTGCCACCA | AGTGTGGCCTT     | GAGGGGACCA | AAATAGG    | CCACAGACTT | CACCTGGAT  | TACACTGGAT  | CCTGCAA       |            |          |       |       |       |       |       | 1409 |
| SPARCI1-C2`SA | CAGCTCT | TTTGCCACCA | AGTGTGGCCTT     | GAGGGGACCA | AAATAGG    | CCACAGACTT | CACCTGGAT  | TACACTGGAT  | CCTGCAA       |            |          |       |       |       |       |       | 1427 |
| SPARCI1-C1`SR | CAGCTTT | TTTGCCACCA | AGTGTGGCCTT     | GAGGGGACCA | AAATAGG    | CCACAGACTT | CACCTGGAT  | TACACTGGAT  | CCTGCAA       |            |          |       |       |       |       |       | 1388 |
| SPARCI1-C2`SR | CAGCTCT | TTTGCCACCA | AGTGTGGCCTT     | GAGGGGACCA | AAATAGG    | CCACAGACTT | CACCTGGAT  | TACACTGGAT  | CCTGCAA       |            |          |       |       |       |       |       | 1397 |

|               |         |           |          |         |            |         |          |           |           |            |           |        |       |       |       |       |      |
|---------------|---------|-----------|----------|---------|------------|---------|----------|-----------|-----------|------------|-----------|--------|-------|-------|-------|-------|------|
| conservation  | 1420    | 1425      | 1430     | 1435    | 1440       | 1445    | 1450     | 1455      | 1460      | 1465       | 1470      | 1475   | 1480  | 1485  | 1490  | 1495  |      |
| SPARCI1`CI    | *****   | *****     | *****    | *****   | *****      | *****   | *****    | *****     | *****     | *****      | *****     | *****  | ***** | ***** | ***** | ***** | 1498 |
| SPARCI1`DR    | ATTTATT | GCTCCATGT | CTAGAGT  | CAGAACT | GGTGCAGTT  | CCCTCTG | CGCATG   | CGGGACTGG | CTGAAGA   | ACGTGCTT   | CTGC      |        |       |       |       |       | 1435 |
| SPARCI1`IP    | ATTTATT | CCACCATGT | CTGAAGAC | CAGAGCT | GATACATTTT | CCA     | CTGCGCAT | GAGAGACT  | GGCTGAAGA | AATGTGCT   | GCTGC     |        |       |       |       |       | 1456 |
| SPARCI1`LW    | ATTTATT | GCTCCATGT | CTAGAGT  | CAGAGCT | GGTGCAGTT  | CCCTCTA | CGTATG   | CGGGATTGG | CTGAAGA   | AATGTGCT   | CTGC      |        |       |       |       |       | 1498 |
| SPARCI1`PN    | ATTTAT  | CCACCATG  | CTGAGCA  | CAGAACT | TGTGCAGTTT | CCA     | CTTCGTAT | GAGGGACT  | GGCTGAAGA | AATGTGCT   | GCTGC     |        |       |       |       |       | 1426 |
| SPARCI1`PP    | ATATATA | .....     | TACCT    | ATTGGT  | GTTTTAG    | GATGTA  | TTTT     | CCAAAG    | GAGATCT   | CAACAAT    | TGCTT     | AGAAAT | TACAT | TT    | TG    |       | 1444 |
| SPARCI1-AM    | .....   | .....     | .....    | .....   | .....      | .....   | .....    | .....     | .....     | .....      | .....     | .....  | ..... | ..... | ..... | ..... | 1041 |
| SPARCI1-C1`CC | ATTTATT | CCTCCATGT | CCAGAGT  | CA      | GAGCTGGT   | GCAGTT  | CCCTCTG  | CGTATG    | CGGAGAT   | TGGCTGAAGA | AATGTGCTT | TTGC   |       |       |       |       | 1471 |
| SPARCI1-C2`CC | ATTTATT | CCTCCATGT | CCAGAGT  | CA      | GAGCTGGT   | GCAGTT  | CCCTCTG  | CGTATG    | CGGGAGAT  | TGGCTGAAGA | AATGTGCTT | CTGC   |       |       |       |       | 1495 |
| SPARCI1-C1`SG | ATTTATT | CCTCCATGT | CCAGAGT  | CA      | GAGCTGGT   | GCAGTT  | CCCTCTG  | CGTATG    | CGGAGAT   | TGGCTGAAGA | AATGTGCTT | TTGC   |       |       |       |       | 1489 |
| SPARCI1-C2`SG | ATTTATT | CCTCCATGT | CCAGAGT  | CA      | GAGCTGGT   | GCAGTT  | CCCTCTG  | CGTATG    | CGGGAGAT  | TGGCTGAAGA | AATGTGCTT | CTGC   |       |       |       |       | 1489 |
| SPARCI1-C1`SA | ATTTAT  | CTTCCATGT | CCAGAGT  | CA      | GAGCTGGT   | GCAGTT  | CCCTCTG  | CGTATG    | CGGAGAT   | TGGCTGAAGA | AATGTGCTT | TTGC   |       |       |       |       | 1489 |
| SPARCI1-C2`SA | ATTTATT | CCTCCATGT | CCAGAGT  | CA      | GAGCTGGT   | GCAGTT  | CCCTCTG  | CGTATG    | CGGGAGAT  | TGGCTGAAGA | AATGTGCTT | CTGC   |       |       |       |       | 1507 |
| SPARCI1-C1`SR | ATTTATT | CCTCCATGT | CCAGAGT  | CA      | GAGCTGGT   | GCAGTT  | CCCTCTG  | CGTATG    | CGGAGAT   | TGGCTGAAGA | AATGTGCTT | TTGC   |       |       |       |       | 1468 |
| SPARCI1-C2`SR | ATTTATT | CCTCA     | AATGTCC  | AGAGTCC | GAGCTGGT   | GCAGTT  | CCCTCTG  | CGTATG    | CGGGAGAT  | TGGCTGAAGA | AATGTGCTT | CTGC   |       |       |       |       | 1477 |

|               |             |        |                                      |            |          |       |             |         |         |       |       |       |       |       |       |       |      |
|---------------|-------------|--------|--------------------------------------|------------|----------|-------|-------------|---------|---------|-------|-------|-------|-------|-------|-------|-------|------|
|               | 1500        | 1505   | 1510                                 | 1515       | 1520     | 1525  | 1530        | 1535    | 1540    | 1545  | 1550  | 1555  | 1560  | 1565  | 1570  | 1575  |      |
| conservation  | *****       | *****  | *****                                | *****      | *****    | ***** | *****       | *****   | *****   | ***** | ***** | ***** | ***** | ***** | ***** | ***** |      |
| SPARCI1`CI    | AGTTATATGAA | CATGAC | TCCATGTCTCCTGGCTTTCTCACAGCTAAACAAAG  | AATCAGGGTT | CAGAAGAT | T     | TATGAGAGT   |         |         |       |       |       |       |       |       |       | 1578 |
| SPARCI1`DR    | AGTTATATGAG | CATGAC | TCCATGTCTCCTGGCTTTCTCACAGCTAAACAGAGA | AATCAGGGTT | CAGAAGAT | T     | TATGAGAGC   |         |         |       |       |       |       |       |       |       | 1515 |
| SPARCI1`IP    | AGCTCTACGAA | CAAGAC | .....TTCTTACAGCCAAGCAGAGAT           | CCAGAGTT   | CAGAAGAT | G     | TACGAGAA    |         |         |       |       |       |       |       |       |       | 1521 |
| SPARCI1`LW    | AGTTATACGAG | CATGAC | TCCATGTCTCCTGGCTTTCTCACAGCTAAACAAAG  | AATCAGGGTT | CAGAAGAT | T     | TATGAGAGC   |         |         |       |       |       |       |       |       |       | 1578 |
| SPARCI1`PN    | AGCTCTATGAG | CACGAC | TCAGTGACTCCTGGCTTCTCACAGGCAAGCAGAG   | AGCCAGGGTT | CAGAAG   | C     | TGATGAGAA   |         |         |       |       |       |       |       |       |       | 1506 |
| SPARCI1`PP    | TTTAGCAAGA  | CACAAA | GTCTCAGAGGAGGCAG...ATGAA             | ACTATGGAGG | AG       | GATGA | AGGTCCAGAAA | AA      | AGACAAA | AGA   | A     |       |       |       |       |       | 1521 |
| SPARCI1-AM    |             |        |                                      |            |          |       |             |         |         |       |       |       |       |       |       |       | 1041 |
| SPARCI1-C1`CC | AGTTATATGAG | CATGAA | TCCATGTCTCCTGGCTTTCTCACAGCTAAACAAAG  | TATCAGGGTT | CAGAAGAT | T     | TATGAGAGT   |         |         |       |       |       |       |       |       |       | 1551 |
| SPARCI1-C2`CC | AGTTATATGAG | CATGAA | TCCATGTCTCCTGGCTTTCTCACAGCTAAACAAAG  | AATCAGGGTT | CAGAAGAT | T     | TATGAGAGT   |         |         |       |       |       |       |       |       |       | 1575 |
| SPARCI1-C1`SG | AGTTATATGAA | CATGAA | TCCATGTCTCCTGGCTTTCTCACAGCTAAACAAAG  | TATCAGGGTT | GAGAAGAT | C     | T           | TGAGAGT |         |       |       |       |       |       |       |       | 1569 |
| SPARCI1-C2`SG | AGTTATATGAG | CATGAA | TCCATGTCTCCTGGCTTTCTCACAGCTAAACAAAG  | AATCAGGGTT | CAGAAGAT | T     | TATGAGAGT   |         |         |       |       |       |       |       |       |       | 1569 |
| SPARCI1-C1`SA | AGTTATATGAA | CATGAA | TCCATGTCTCCTGGCTTTCTCACAGCTAAACAAAG  | TATCAGGGTT | CAGAAGAT | C     | T           | TGAGAGT |         |       |       |       |       |       |       |       | 1569 |
| SPARCI1-C2`SA | AGTTATATGAG | CATGAA | TCCATGTCTCCTGGCTTTCTCACAGCTAAACAAAG  | AATCAGGGTT | CAGAAGAT | C     | T           | TGAGAGT |         |       |       |       |       |       |       |       | 1587 |
| SPARCI1-C1`SR | AGTTATATGAA | CATGAA | TCCATGTCTCCTGGCTTTCTCACAGCTAAACAAAG  | TATCAGGGTT | CAGAAGAT | C     | T           | TGAAAGT |         |       |       |       |       |       |       |       | 1548 |
| SPARCI1-C2`SR | AGTTATATGAG | CATGAA | TCCATGTCTCCTGGCTTTCTCACAGCTAAACAAAG  | AATCAGGGTT | CAGAAGAT | T     | TATGAGAGT   |         |         |       |       |       |       |       |       |       | 1557 |

|               |           |                      |                                                     |                                             |                  |           |          |          |        |       |       |       |       |       |       |       |      |
|---------------|-----------|----------------------|-----------------------------------------------------|---------------------------------------------|------------------|-----------|----------|----------|--------|-------|-------|-------|-------|-------|-------|-------|------|
|               | 1580      | 1585                 | 1590                                                | 1595                                        | 1600             | 1605      | 1610     | 1615     | 1620   | 1625  | 1630  | 1635  | 1640  | 1645  | 1650  | 1655  |      |
| conservation  | *****     | *****                | *****                                               | *****                                       | *****            | *****     | *****    | *****    | *****  | ***** | ***** | ***** | ***** | ***** | ***** | ***** |      |
| SPARCI1`CI    | GAGAGGCGT | CTTCATGCAGGCGATCACA  | CCCGGAGCT                                           | TTCTACAGCAGGACTTTGAGAAGAACTACAACATGTACATCTA |                  |           |          |          |        |       |       |       |       |       |       |       | 1658 |
| SPARCI1`DR    | GAGAGACGT | CTTCATGCAGGAGATCACCC | TGTTGAAATTCTG                                       | CAGCAGGACTTTGAGAAGAACTACAACATGTACATCTA      |                  |           |          |          |        |       |       |       |       |       |       |       | 1595 |
| SPARCI1`IP    | GAGAGGCGT | CTCCATGCAGGCGATCACCC | AGTTGAGCT                                           | CCTTGCTCGGACTTTGAAAAGAA                     | TTACAACATGTACATA | ATA       |          |          |        |       |       |       |       |       |       |       | 1601 |
| SPARCI1`LW    | GAGAGGCGT | CTTCATGCAGGCGATCACCC | GTCTAGCTTCTACAGCAGGACTTTGAGAAGAACTACAACATGTACATCTA  |                                             |                  |           |          |          |        |       |       |       |       |       |       |       | 1658 |
| SPARCI1`PN    | GAGCGGCGT | CTCCATGCAGGGGAC      | CATTCCATTGAATTGCTGGCTCAGGACTTTGAGAAA                | AAACTAC                                     | CCTATGTACATCTA   |           |          |          |        |       |       |       |       |       |       |       | 1586 |
| SPARCI1`PP    | TTAAGGAGA | CTGAGG.....          | AGGAGGAGG                                           | GAAAGGAA                                    | AAGGGAGAA        | TCTACAATG | GAGAATGA | AAGATGTA | ACTGAG |       |       |       |       |       |       |       | 1592 |
| SPARCI1-AM    |           |                      |                                                     |                                             |                  |           |          |          |        |       |       |       |       |       |       |       | 1041 |
| SPARCI1-C1`CC | GAGAGACGT | CTTCATGCAGACGATCACCC | CGTTGAGATTCTACAGCAGGACTTTGAGAAGAACTACAACATGTACATCTA |                                             |                  |           |          |          |        |       |       |       |       |       |       |       | 1631 |
| SPARCI1-C2`CC | GAGAGACGT | CTTCATGCAGGCGATCACCC | TGTTGAACTTCTACAGCAGGACTTTGAGAAGAACTACAACATGTACATCTA |                                             |                  |           |          |          |        |       |       |       |       |       |       |       | 1655 |
| SPARCI1-C1`SG | GAGAGACGT | CTTCATGCAGGCGATCACCC | CGTTGAGATTCTACAGCAGGACTTTGAGAAGAACTACAACATGTACATCTA |                                             |                  |           |          |          |        |       |       |       |       |       |       |       | 1649 |
| SPARCI1-C2`SG | GAGAGACGT | CTTCATGCAGGCGATCACCC | TGTTGAACTTCTACAGCAGGACTTTGAGAAGAACTACAACATGTACATCTA |                                             |                  |           |          |          |        |       |       |       |       |       |       |       | 1649 |
| SPARCI1-C1`SA | GAGAGATGT | CTTCATGCAGGCGATCACCC | TGTTGAGATTCTACAGCAGGACTTTGAGAAGAACTACAACATGTACATCTA |                                             |                  |           |          |          |        |       |       |       |       |       |       |       | 1649 |
| SPARCI1-C2`SA | GAGAGACGT | CTTCATGCAGGCGATCACCC | TGTTGAACTTCTACAGCAGGACTTTGAGAAGAACTACAACATGTACATCTA |                                             |                  |           |          |          |        |       |       |       |       |       |       |       | 1667 |
| SPARCI1-C1`SR | GAGAGACGT | CTTCATGCAGGTGATCACCC | CGTTGAGATTCTACAGCAGGACTTTGAGAAGAACTACAACATGTACATCTA |                                             |                  |           |          |          |        |       |       |       |       |       |       |       | 1628 |
| SPARCI1-C2`SR | GAGAGACGT | CTTCATGCAGGCGATCACCC | TGTTGAACTTCTACAGCAGGACTTTGAGAAGAACTACAACATGTACATCTA |                                             |                  |           |          |          |        |       |       |       |       |       |       |       | 1637 |

|               | 1660   | 1665          |  | 1670                       | 1675      | 1680     | 1685    | 1690          | 1695                     | 1700             | 1705             | 1710  | 1715                   | 1720  | 1725  |      |
|---------------|--------|---------------|--|----------------------------|-----------|----------|---------|---------------|--------------------------|------------------|------------------|-------|------------------------|-------|-------|------|
| conservation  | *****  | *****         |  | *****                      | *****     | *****    | *****   | *****         | *****                    | *****            | *****            | ***** | *****                  | ***** | ***** |      |
| SPARCI1`CI    | TCCAGT | G.....        |  | CACTGGCAGTTTGCACAA         | AATGGACCA | A        | CATCCTT | CAGACAG       | GTTTCTT                  | A                | CTCACTCTGAGCTGG  |       |                        |       |       | 1729 |
| SPARCI1`DR    | TCCAGT | G.....        |  | CACTGGCAGTTTGCACAGATGGACCA | G         | CATCCTT  | CAGACAG | GTTTTT        | TG                       | A                | CTCACTCTGAGCTGG  |       |                        |       |       | 1666 |
| SPARCI1`IP    | CCCAGT | G.....        |  | CATTGGCAGTTTGCACAA         | AATGGACCA | A        | CATCC   | ATCAGACAG     | GTTTCT                   | G                | TCTCACTCAGAGCTTG |       |                        |       |       | 1672 |
| SPARCI1`LW    | TCCAGT | G.....        |  | CACTGGCAGTTTGCACAA         | AATGGACCA | A        | CATCCTT | CAGACAG       | GATTCTTT                 | TCTCACTCTGAGCTGG |                  |       |                        |       |       | 1729 |
| SPARCI1`PN    | TCCT   | GTG.....      |  | CACTGGCAGTTTCGGC           | CAGATGGAT | CAG      | CATCC   | ATCAGACAG     | GTTTCT                   | G                | TCTCACTCGGAGCTGG |       |                        |       |       | 1657 |
| SPARCI1`PP    | AAG    | AGTGAAGATATCT |  | CACAGG                     | AAAA      | TAGCTTCT | ATGGA   | AAA           | ATTCT                    | TAA              | AGTGT            | AAG   | ATTCTTTCTCACTCTGAGCTGG |       |       | 1672 |
| SPARCI1-AM    |        |               |  |                            |           |          |         |               |                          |                  |                  |       |                        |       |       | 1041 |
| SPARCI1-C1`CC | TCCAGT | G.....        |  | CACTGGCAGTTTGCACAGATGGACCA | G         | CATCCTT  | CAGACA  | A             | GTTTCTTTTCTCACTCTGAGCTGG |                  |                  |       |                        |       |       | 1702 |
| SPARCI1-C2`CC | TCCAGT | T.....        |  | CACTGGCAGTTTGCACAGATGGACCA | G         | CATCCTT  | CAGACAG | GTTTCTTTTCTCA | TTCTGGAGCTGG             |                  |                  |       |                        |       |       | 1726 |
| SPARCI1-C1`SG | TCCAGT | G.....        |  | CACTGGCAGTTTGCACAGATGGACCA | G         | CATCCTT  | CAGACA  | A             | GTTTCTTTTCTCACTCTGAGCTGG |                  |                  |       |                        |       |       | 1720 |
| SPARCI1-C2`SG | TCCAGT | T.....        |  | CACTGGCAGTTTGCACAGATGGACCA | A         | CATCCTT  | CAGACAG | GTTTCTTTTCTCA | TTCTGAGCTGG              |                  |                  |       |                        |       |       | 1720 |
| SPARCI1-C1`SA | TCCAGT | G.....        |  | CACTGGCAGTTTGCACAGATGGACCA | G         | CATCCTT  | CAGACA  | A             | GTTTCTTTTCTCACTCTGAGCTGG |                  |                  |       |                        |       |       | 1720 |
| SPARCI1-C2`SA | TCCAGT | T.....        |  | CACTGGCAGTTTGCACAGATGGACCA | A         | CATCCTT  | CAGACAG | GTTTCTTTTCTCA | TTCTGAGCTGG              |                  |                  |       |                        |       |       | 1738 |
| SPARCI1-C1`SR | TCCAGT | G.....        |  | CACTGGCAGTTTGCACAGATGGACCA | G         | CATCCTT  | CAGACA  | A             | GTTTCTTTTCTCACTCTGAGCTGG |                  |                  |       |                        |       |       | 1699 |
| SPARCI1-C2`SR | TCCAGT | T.....        |  | CACTGGCAGTTTGCACAGATGGACCA | A         | CATCCTT  | CAGACAG | GTTTCTTTTCTCA | TTCTGAGCTGG              |                  |                  |       |                        |       |       | 1708 |

|               |                  |                                          |                                        |              |              |             |       |       |       |       |       |       |       |       |       |       |      |
|---------------|------------------|------------------------------------------|----------------------------------------|--------------|--------------|-------------|-------|-------|-------|-------|-------|-------|-------|-------|-------|-------|------|
|               | 1730             | 1735                                     | 1740                                   | 1745         | 1750         | 1755        | 1760  | 1765  | 1770  | 1775  | 1780  | 1785  | 1790  | 1795  | 1800  | 1805  |      |
| conservation  | *****            | *****                                    | *****                                  | *****        | *****        | *****       | ***** | ***** | ***** | ***** | ***** | ***** | ***** | ***** | ***** | ***** |      |
| SPARCI1`CI    | CTCCGCTGCGCGTTCC | ACTG                                     | GTTCCCATGGAGCATTGCACCTCAGTCTTTTTTCCAAA | AGTGTGATGCG  | GACAAGGACAAA |             |       |       |       |       |       |       |       |       |       |       | 1809 |
| SPARCI1`DR    | CTCCGCTGCGCGTTCC | TCTAGTTCCCATGGAGCATTGCACCTCAGTCTTTT      | TCAAAATG                               | TGTGATGCG    | GACAAGGACAAA |             |       |       |       |       |       |       |       |       |       |       | 1746 |
| SPARCI1`IP    | CTCCTCTGCGTG     | CCCCCTCTG                                | GTTCCATGGAGCACTGCATTCAGT               | TTTTTTCCACG  | AGTGTGATGCG  | GACAAGGACAA | G     |       |       |       |       |       |       |       |       |       | 1752 |
| SPARCI1`LW    | CTCCTCTGCGGTTCC  | CTGGTTCCCATGGAGCATTGCACCTCTGTCTTTTTTCCAG | AGTGTGATGCTG                           | GACAAGGACAAA |              |             |       |       |       |       |       |       |       |       |       |       | 1809 |
| SPARCI1`PN    | CTCCTCTGCGTG     | TTCATTGGTTCCCATGGAGCATTGCAC              | TTTTCAGTCTTTTTTCCAGGA                  | ATGCGACG     | GACAAGGACAA  | G           |       |       |       |       |       |       |       |       |       |       | 1737 |
| SPARCI1`PP    | CTCCTCTGCGCGTTCC | CTGTTCCCATGGAGCATTGCACCTCTGTCTTTTTTCCAAA | AGTGTGATGCTG                           | GACAAGAACAAA |              |             |       |       |       |       |       |       |       |       |       |       | 1752 |
| SPARCI1-AM    |                  |                                          |                                        |              |              |             |       |       |       |       |       |       |       |       |       |       | 1041 |
| SPARCI1-C1`CC | CTCCACTGCGCGT    | CCCCCTAGTTCCA                            | AATGGAGCATTGCACCTCAGTCTTTTTTCCAAA      | AGTGTGATGCTG | GACAAGGACAAA |             |       |       |       |       |       |       |       |       |       |       | 1782 |
| SPARCI1-C2`CC | TTCCATTGCGGG     | TCCCCCTAGTTCCA                           | AATGGAGCATTGCACCTCAGTCTTTTTTCCAAA      | AGTGTGATGCTG | GACAAGGACAAA |             |       |       |       |       |       |       |       |       |       |       | 1806 |
| SPARCI1-C1`SG | CTCCACTGCGCGT    | TCCCCCTAGTTCCA                           | AATGGAGCATTGCACCTCAGTCTTTTTTCCAAA      | AGTGTGATGCTG | GACAAGGACAAA |             |       |       |       |       |       |       |       |       |       |       | 1800 |
| SPARCI1-C2`SG | CTCCACTGCGCGT    | TCCCCCTAGTTCCA                           | AATGGAGCATTGCACCTCAGTCTTTTTTCCAAA      | AGTGTGATGCTG | GACAAGGACAAA |             |       |       |       |       |       |       |       |       |       |       | 1800 |
| SPARCI1-C1`SA | CTCCACTGCGCGT    | TCCCCCTAGTTCCA                           | AATGGAGCATTGCACCTCAGTCTTTTTTCCAAA      | AGTGTGATGCTG | GACAAGGACAAA |             |       |       |       |       |       |       |       |       |       |       | 1800 |
| SPARCI1-C2`SA | CTCCACTGCGCGT    | TCCCCCTAGTTCCA                           | AATGGAGCATTGCACCTCAGTCTTTTTTCCAAA      | AGTGTGATGCTG | GACAAGGACAAA |             |       |       |       |       |       |       |       |       |       |       | 1818 |
| SPARCI1-C1`SR | CTCCACTGCGT      | TGTTCCCCCTAGTTCCA                        | AATGGAGCATTGTACCTCAGTCTTTTTTCCAAA      | AGTGTGATGCTG | GACAAGGACAAA |             |       |       |       |       |       |       |       |       |       |       | 1779 |
| SPARCI1-C2`SR | CTCCACTGCGCGT    | TCCCCCTAGTTCCA                           | AATGGACATTGCACCTCAGTCTTTTTTCCAAA       | AGTGTGATGCTG | GACAAGGACAAA |             |       |       |       |       |       |       |       |       |       |       | 1788 |

|              |           |           |           |           |           |           |           |           |           |           |           |           |           |           |           |   |   |   |   |   |   |   |   |   |   |   |   |   |   |   |   |   |   |   |   |   |   |   |   |   |      |   |   |   |   |   |   |   |   |      |   |   |      |  |  |  |  |  |  |  |  |  |  |  |  |  |  |  |  |  |  |  |  |  |  |  |  |  |  |  |  |  |  |  |  |  |  |  |  |  |  |  |  |  |  |  |  |  |  |  |  |  |  |  |  |  |  |  |  |  |  |  |  |  |  |  |  |  |  |  |  |  |  |  |  |  |  |  |  |  |  |  |  |  |  |  |  |  |  |  |  |  |  |  |  |  |  |  |  |  |  |  |  |  |  |  |  |  |  |  |  |  |  |  |  |  |  |  |  |  |  |  |  |  |  |  |  |  |  |  |  |  |  |  |  |  |  |  |  |  |  |  |  |  |  |  |  |  |  |  |  |  |  |  |  |  |  |  |  |  |  |  |  |  |  |  |  |  |  |  |  |  |  |  |  |  |  |  |  |  |  |  |  |  |  |  |  |  |  |  |  |  |  |  |  |  |  |  |  |  |  |  |  |  |  |  |  |  |  |  |  |  |  |  |  |  |  |  |  |  |  |  |  |  |  |  |  |  |  |  |  |  |  |  |  |  |  |  |  |  |  |  |  |  |  |  |  |  |  |  |  |  |  |  |  |  |  |  |  |  |  |  |  |  |  |  |  |  |  |  |  |  |  |  |  |  |  |  |  |  |  |  |  |  |  |  |  |  |  |  |  |  |  |  |  |  |  |  |  |  |  |  |  |  |  |  |  |  |  |  |  |  |  |  |  |  |  |  |  |  |  |  |  |  |  |  |  |  |  |  |  |  |  |  |  |  |  |  |  |  |  |  |  |  |  |  |  |  |  |  |  |  |  |  |  |  |  |  |  |  |  |  |  |  |  |  |  |  |  |  |  |  |  |  |  |  |  |  |  |  |  |  |  |  |  |  |  |  |  |  |  |  |  |  |  |  |  |  |  |  |  |  |  |  |  |  |  |  |  |  |  |  |  |  |  |  |  |  |  |  |  |  |  |  |  |  |  |  |  |  |  |  |  |  |  |  |  |  |  |  |  |  |  |  |  |  |  |  |  |  |  |  |  |  |  |  |  |  |  |  |  |  |  |  |  |  |  |  |  |  |  |  |  |  |  |  |  |  |  |  |  |  |  |  |  |  |  |  |  |  |  |  |  |  |  |  |  |  |  |  |  |  |  |  |  |  |  |  |  |  |  |  |  |  |  |  |  |  |  |  |  |  |  |  |  |  |  |  |  |  |  |  |  |  |  |  |  |  |  |  |  |  |  |  |  |  |  |  |  |  |  |  |  |  |  |  |  |  |  |  |  |  |  |  |  |  |  |  |  |  |  |  |  |  |  |  |  |  |  |  |  |  |  |  |  |  |  |  |  |  |  |  |  |  |  |  |  |  |  |  |  |  |  |  |  |  |  |  |  |  |  |  |  |  |  |  |  |  |  |  |  |  |  |  |  |  |  |  |  |  |  |  |  |  |  |  |  |  |  |  |  |  |  |  |  |  |  |  |  |  |  |  |  |  |  |  |  |  |  |  |  |  |  |  |  |  |  |  |  |  |  |  |  |  |  |  |  |  |  |  |  |  |  |  |  |  |  |  |  |  |  |  |  |  |  |  |  |  |  |  |  |  |  |  |  |  |  |  |  |  |  |  |  |  |  |  |  |  |  |  |  |  |  |  |  |  |  |  |  |  |  |  |  |  |  |  |  |  |  |  |  |  |  |  |  |  |  |  |  |  |  |  |  |  |  |  |  |  |  |  |  |  |  |  |  |  |  |  |  |  |  |  |  |  |  |  |  |  |  |  |  |  |  |  |  |  |  |  |  |  |  |  |  |  |  |  |  |  |  |  |  |  |  |  |  |  |  |  |  |  |  |  |  |  |  |  |  |  |  |  |  |  |  |  |  |  |  |  |  |  |  |  |  |  |  |  |  |  |  |  |  |  |  |  |  |  |  |  |  |  |  |  |  |  |  |  |  |  |  |  |  |  |  |  |  |  |  |  |  |  |  |  |  |  |  |  |  |  |  |  |  |  |  |  |  |  |  |  |  |  |  |  |  |  |  |  |  |  |  |  |  |  |  |  |  |  |  |  |  |  |  |  |  |  |  |  |  |  |  |  |  |  |  |  |  |  |  |  |  |  |  |  |  |  |  |  |  |  |  |  |  |  |  |  |  |  |  |  |  |  |  |  |  |  |  |  |  |  |  |  |  |  |  |  |  |  |  |  |  |  |  |  |  |  |  |  |  |  |  |  |  |  |  |  |  |  |  |  |  |  |  |  |  |  |  |  |  |  |  |  |  |  |  |  |  |  |  |  |  |  |  |  |  |  |  |  |  |  |  |  |  |  |  |  |  |  |  |  |  |  |  |  |  |  |  |  |  |  |  |  |  |  |  |  |  |  |  |  |  |  |  |  |  |  |  |  |  |  |  |  |  |  |  |  |  |  |  |  |  |  |  |  |  |  |  |  |  |  |  |  |  |  |  |  |  |  |  |  |  |  |  |  |  |  |  |  |  |  |  |  |  |  |  |  |  |  |  |  |  |  |  |  |  |  |  |  |  |  |  |  |  |  |  |  |  |  |  |  |  |  |  |  |  |  |  |  |  |  |  |  |  |  |  |  |  |  |  |  |  |  |  |  |  |  |  |  |  |  |  |  |  |  |  |  |  |  |  |  |  |  |  |
|--------------|-----------|-----------|-----------|-----------|-----------|-----------|-----------|-----------|-----------|-----------|-----------|-----------|-----------|-----------|-----------|---|---|---|---|---|---|---|---|---|---|---|---|---|---|---|---|---|---|---|---|---|---|---|---|---|------|---|---|---|---|---|---|---|---|------|---|---|------|--|--|--|--|--|--|--|--|--|--|--|--|--|--|--|--|--|--|--|--|--|--|--|--|--|--|--|--|--|--|--|--|--|--|--|--|--|--|--|--|--|--|--|--|--|--|--|--|--|--|--|--|--|--|--|--|--|--|--|--|--|--|--|--|--|--|--|--|--|--|--|--|--|--|--|--|--|--|--|--|--|--|--|--|--|--|--|--|--|--|--|--|--|--|--|--|--|--|--|--|--|--|--|--|--|--|--|--|--|--|--|--|--|--|--|--|--|--|--|--|--|--|--|--|--|--|--|--|--|--|--|--|--|--|--|--|--|--|--|--|--|--|--|--|--|--|--|--|--|--|--|--|--|--|--|--|--|--|--|--|--|--|--|--|--|--|--|--|--|--|--|--|--|--|--|--|--|--|--|--|--|--|--|--|--|--|--|--|--|--|--|--|--|--|--|--|--|--|--|--|--|--|--|--|--|--|--|--|--|--|--|--|--|--|--|--|--|--|--|--|--|--|--|--|--|--|--|--|--|--|--|--|--|--|--|--|--|--|--|--|--|--|--|--|--|--|--|--|--|--|--|--|--|--|--|--|--|--|--|--|--|--|--|--|--|--|--|--|--|--|--|--|--|--|--|--|--|--|--|--|--|--|--|--|--|--|--|--|--|--|--|--|--|--|--|--|--|--|--|--|--|--|--|--|--|--|--|--|--|--|--|--|--|--|--|--|--|--|--|--|--|--|--|--|--|--|--|--|--|--|--|--|--|--|--|--|--|--|--|--|--|--|--|--|--|--|--|--|--|--|--|--|--|--|--|--|--|--|--|--|--|--|--|--|--|--|--|--|--|--|--|--|--|--|--|--|--|--|--|--|--|--|--|--|--|--|--|--|--|--|--|--|--|--|--|--|--|--|--|--|--|--|--|--|--|--|--|--|--|--|--|--|--|--|--|--|--|--|--|--|--|--|--|--|--|--|--|--|--|--|--|--|--|--|--|--|--|--|--|--|--|--|--|--|--|--|--|--|--|--|--|--|--|--|--|--|--|--|--|--|--|--|--|--|--|--|--|--|--|--|--|--|--|--|--|--|--|--|--|--|--|--|--|--|--|--|--|--|--|--|--|--|--|--|--|--|--|--|--|--|--|--|--|--|--|--|--|--|--|--|--|--|--|--|--|--|--|--|--|--|--|--|--|--|--|--|--|--|--|--|--|--|--|--|--|--|--|--|--|--|--|--|--|--|--|--|--|--|--|--|--|--|--|--|--|--|--|--|--|--|--|--|--|--|--|--|--|--|--|--|--|--|--|--|--|--|--|--|--|--|--|--|--|--|--|--|--|--|--|--|--|--|--|--|--|--|--|--|--|--|--|--|--|--|--|--|--|--|--|--|--|--|--|--|--|--|--|--|--|--|--|--|--|--|--|--|--|--|--|--|--|--|--|--|--|--|--|--|--|--|--|--|--|--|--|--|--|--|--|--|--|--|--|--|--|--|--|--|--|--|--|--|--|--|--|--|--|--|--|--|--|--|--|--|--|--|--|--|--|--|--|--|--|--|--|--|--|--|--|--|--|--|--|--|--|--|--|--|--|--|--|--|--|--|--|--|--|--|--|--|--|--|--|--|--|--|--|--|--|--|--|--|--|--|--|--|--|--|--|--|--|--|--|--|--|--|--|--|--|--|--|--|--|--|--|--|--|--|--|--|--|--|--|--|--|--|--|--|--|--|--|--|--|--|--|--|--|--|--|--|--|--|--|--|--|--|--|--|--|--|--|--|--|--|--|--|--|--|--|--|--|--|--|--|--|--|--|--|--|--|--|--|--|--|--|--|--|--|--|--|--|--|--|--|--|--|--|--|--|--|--|--|--|--|--|--|--|--|--|--|--|--|--|--|--|--|--|--|--|--|--|--|--|--|--|--|--|--|--|--|--|--|--|--|--|--|--|--|--|--|--|--|--|--|--|--|--|--|--|--|--|--|--|--|--|--|--|--|--|--|--|--|--|--|--|--|--|--|--|--|--|--|--|--|--|--|--|--|--|--|--|--|--|--|--|--|--|--|--|--|--|--|--|--|--|--|--|--|--|--|--|--|--|--|--|--|--|--|--|--|--|--|--|--|--|--|--|--|--|--|--|--|--|--|--|--|--|--|--|--|--|--|--|--|--|--|--|--|--|--|--|--|--|--|--|--|--|--|--|--|--|--|--|--|--|--|--|--|--|--|--|--|--|--|--|--|--|--|--|--|--|--|--|--|--|--|--|--|--|--|--|--|--|--|--|--|--|--|--|--|--|--|--|--|--|--|--|--|--|--|--|--|--|--|--|--|--|--|--|--|--|--|--|--|--|--|--|--|--|--|--|--|--|--|--|--|--|--|--|--|--|--|--|--|--|--|--|--|--|--|--|--|--|--|--|--|--|--|--|--|--|--|--|--|--|--|--|--|--|--|--|--|--|--|--|--|--|--|--|--|--|--|--|--|--|--|--|--|--|--|--|--|--|--|--|--|--|--|--|--|--|--|--|--|--|--|--|--|--|--|--|--|--|--|--|--|--|--|--|--|--|--|--|--|--|--|--|--|--|--|--|--|--|--|--|--|--|--|--|--|--|--|--|--|--|--|--|--|--|--|--|--|--|--|--|--|--|--|
|              | 1810      | 1815      | 1820      | 1825      | 1830      | 1835      | 1840      | 1845      | 1850      | 1855      | 1860      | 1865      | 1870      | 1875      | 1880      |   |   |   |   |   |   |   |   |   |   |   |   |   |   |   |   |   |   |   |   |   |   |   |   |   |      |   |   |   |   |   |   |   |   |      |   |   |      |  |  |  |  |  |  |  |  |  |  |  |  |  |  |  |  |  |  |  |  |  |  |  |  |  |  |  |  |  |  |  |  |  |  |  |  |  |  |  |  |  |  |  |  |  |  |  |  |  |  |  |  |  |  |  |  |  |  |  |  |  |  |  |  |  |  |  |  |  |  |  |  |  |  |  |  |  |  |  |  |  |  |  |  |  |  |  |  |  |  |  |  |  |  |  |  |  |  |  |  |  |  |  |  |  |  |  |  |  |  |  |  |  |  |  |  |  |  |  |  |  |  |  |  |  |  |  |  |  |  |  |  |  |  |  |  |  |  |  |  |  |  |  |  |  |  |  |  |  |  |  |  |  |  |  |  |  |  |  |  |  |  |  |  |  |  |  |  |  |  |  |  |  |  |  |  |  |  |  |  |  |  |  |  |  |  |  |  |  |  |  |  |  |  |  |  |  |  |  |  |  |  |  |  |  |  |  |  |  |  |  |  |  |  |  |  |  |  |  |  |  |  |  |  |  |  |  |  |  |  |  |  |  |  |  |  |  |  |  |  |  |  |  |  |  |  |  |  |  |  |  |  |  |  |  |  |  |  |  |  |  |  |  |  |  |  |  |  |  |  |  |  |  |  |  |  |  |  |  |  |  |  |  |  |  |  |  |  |  |  |  |  |  |  |  |  |  |  |  |  |  |  |  |  |  |  |  |  |  |  |  |  |  |  |  |  |  |  |  |  |  |  |  |  |  |  |  |  |  |  |  |  |  |  |  |  |  |  |  |  |  |  |  |  |  |  |  |  |  |  |  |  |  |  |  |  |  |  |  |  |  |  |  |  |  |  |  |  |  |  |  |  |  |  |  |  |  |  |  |  |  |  |  |  |  |  |  |  |  |  |  |  |  |  |  |  |  |  |  |  |  |  |  |  |  |  |  |  |  |  |  |  |  |  |  |  |  |  |  |  |  |  |  |  |  |  |  |  |  |  |  |  |  |  |  |  |  |  |  |  |  |  |  |  |  |  |  |  |  |  |  |  |  |  |  |  |  |  |  |  |  |  |  |  |  |  |  |  |  |  |  |  |  |  |  |  |  |  |  |  |  |  |  |  |  |  |  |  |  |  |  |  |  |  |  |  |  |  |  |  |  |  |  |  |  |  |  |  |  |  |  |  |  |  |  |  |  |  |  |  |  |  |  |  |  |  |  |  |  |  |  |  |  |  |  |  |  |  |  |  |  |  |  |  |  |  |  |  |  |  |  |  |  |  |  |  |  |  |  |  |  |  |  |  |  |  |  |  |  |  |  |  |  |  |  |  |  |  |  |  |  |  |  |  |  |  |  |  |  |  |  |  |  |  |  |  |  |  |  |  |  |  |  |  |  |  |  |  |  |  |  |  |  |  |  |  |  |  |  |  |  |  |  |  |  |  |  |  |  |  |  |  |  |  |  |  |  |  |  |  |  |  |  |  |  |  |  |  |  |  |  |  |  |  |  |  |  |  |  |  |  |  |  |  |  |  |  |  |  |  |  |  |  |  |  |  |  |  |  |  |  |  |  |  |  |  |  |  |  |  |  |  |  |  |  |  |  |  |  |  |  |  |  |  |  |  |  |  |  |  |  |  |  |  |  |  |  |  |  |  |  |  |  |  |  |  |  |  |  |  |  |  |  |  |  |  |  |  |  |  |  |  |  |  |  |  |  |  |  |  |  |  |  |  |  |  |  |  |  |  |  |  |  |  |  |  |  |  |  |  |  |  |  |  |  |  |  |  |  |  |  |  |  |  |  |  |  |  |  |  |  |  |  |  |  |  |  |  |  |  |  |  |  |  |  |  |  |  |  |  |  |  |  |  |  |  |  |  |  |  |  |  |  |  |  |  |  |  |  |  |  |  |  |  |  |  |  |  |  |  |  |  |  |  |  |  |  |  |  |  |  |  |  |  |  |  |  |  |  |  |  |  |  |  |  |  |  |  |  |  |  |  |  |  |  |  |  |  |  |  |  |  |  |  |  |  |  |  |  |  |  |  |  |  |  |  |  |  |  |  |  |  |  |  |  |  |  |  |  |  |  |  |  |  |  |  |  |  |  |  |  |  |  |  |  |  |  |  |  |  |  |  |  |  |  |  |  |  |  |  |  |  |  |  |  |  |  |  |  |  |  |  |  |  |  |  |  |  |  |  |  |  |  |  |  |  |  |  |  |  |  |  |  |  |  |  |  |  |  |  |  |  |  |  |  |  |  |  |  |  |  |  |  |  |  |  |  |  |  |  |  |  |  |  |  |  |  |  |  |  |  |  |  |  |  |  |  |  |  |  |  |  |  |  |  |  |  |  |  |  |  |  |  |  |  |  |  |  |  |  |  |  |  |  |  |  |  |  |  |  |  |  |  |  |  |  |  |  |  |  |  |  |  |  |  |  |  |  |  |  |  |  |  |  |  |  |  |  |  |  |  |  |  |  |  |  |  |  |  |  |  |  |  |  |  |  |  |  |  |  |  |  |  |  |  |  |  |  |  |  |  |  |  |  |  |  |  |  |  |  |  |  |  |  |  |  |  |  |  |  |  |  |  |  |  |  |  |  |  |  |  |  |  |  |  |  |  |  |  |  |  |  |  |  |  |  |  |  |  |  |  |  |  |  |  |  |  |  |
| conservation | * * * * * | * * * * * | * * * * * | * * * * * | * * * * * | * * * * * | * * * * * | * * * * * | * * * * * | * * * * * | * * * * * | * * * * * | * * * * * | * * * * * | * * * * * |   |   |   |   |   |   |   |   |   |   |   |   |   |   |   |   |   |   |   |   |   |   |   |   |   |      |   |   |   |   |   |   |   |   |      |   |   |      |  |  |  |  |  |  |  |  |  |  |  |  |  |  |  |  |  |  |  |  |  |  |  |  |  |  |  |  |  |  |  |  |  |  |  |  |  |  |  |  |  |  |  |  |  |  |  |  |  |  |  |  |  |  |  |  |  |  |  |  |  |  |  |  |  |  |  |  |  |  |  |  |  |  |  |  |  |  |  |  |  |  |  |  |  |  |  |  |  |  |  |  |  |  |  |  |  |  |  |  |  |  |  |  |  |  |  |  |  |  |  |  |  |  |  |  |  |  |  |  |  |  |  |  |  |  |  |  |  |  |  |  |  |  |  |  |  |  |  |  |  |  |  |  |  |  |  |  |  |  |  |  |  |  |  |  |  |  |  |  |  |  |  |  |  |  |  |  |  |  |  |  |  |  |  |  |  |  |  |  |  |  |  |  |  |  |  |  |  |  |  |  |  |  |  |  |  |  |  |  |  |  |  |  |  |  |  |  |  |  |  |  |  |  |  |  |  |  |  |  |  |  |  |  |  |  |  |  |  |  |  |  |  |  |  |  |  |  |  |  |  |  |  |  |  |  |  |  |  |  |  |  |  |  |  |  |  |  |  |  |  |  |  |  |  |  |  |  |  |  |  |  |  |  |  |  |  |  |  |  |  |  |  |  |  |  |  |  |  |  |  |  |  |  |  |  |  |  |  |  |  |  |  |  |  |  |  |  |  |  |  |  |  |  |  |  |  |  |  |  |  |  |  |  |  |  |  |  |  |  |  |  |  |  |  |  |  |  |  |  |  |  |  |  |  |  |  |  |  |  |  |  |  |  |  |  |  |  |  |  |  |  |  |  |  |  |  |  |  |  |  |  |  |  |  |  |  |  |  |  |  |  |  |  |  |  |  |  |  |  |  |  |  |  |  |  |  |  |  |  |  |  |  |  |  |  |  |  |  |  |  |  |  |  |  |  |  |  |  |  |  |  |  |  |  |  |  |  |  |  |  |  |  |  |  |  |  |  |  |  |  |  |  |  |  |  |  |  |  |  |  |  |  |  |  |  |  |  |  |  |  |  |  |  |  |  |  |  |  |  |  |  |  |  |  |  |  |  |  |  |  |  |  |  |  |  |  |  |  |  |  |  |  |  |  |  |  |  |  |  |  |  |  |  |  |  |  |  |  |  |  |  |  |  |  |  |  |  |  |  |  |  |  |  |  |  |  |  |  |  |  |  |  |  |  |  |  |  |  |  |  |  |  |  |  |  |  |  |  |  |  |  |  |  |  |  |  |  |  |  |  |  |  |  |  |  |  |  |  |  |  |  |  |  |  |  |  |  |  |  |  |  |  |  |  |  |  |  |  |  |  |  |  |  |  |  |  |  |  |  |  |  |  |  |  |  |  |  |  |  |  |  |  |  |  |  |  |  |  |  |  |  |  |  |  |  |  |  |  |  |  |  |  |  |  |  |  |  |  |  |  |  |  |  |  |  |  |  |  |  |  |  |  |  |  |  |  |  |  |  |  |  |  |  |  |  |  |  |  |  |  |  |  |  |  |  |  |  |  |  |  |  |  |  |  |  |  |  |  |  |  |  |  |  |  |  |  |  |  |  |  |  |  |  |  |  |  |  |  |  |  |  |  |  |  |  |  |  |  |  |  |  |  |  |  |  |  |  |  |  |  |  |  |  |  |  |  |  |  |  |  |  |  |  |  |  |  |  |  |  |  |  |  |  |  |  |  |  |  |  |  |  |  |  |  |  |  |  |  |  |  |  |  |  |  |  |  |  |  |  |  |  |  |  |  |  |  |  |  |  |  |  |  |  |  |  |  |  |  |  |  |  |  |  |  |  |  |  |  |  |  |  |  |  |  |  |  |  |  |  |  |  |  |  |  |  |  |  |  |  |  |  |  |  |  |  |  |  |  |  |  |  |  |  |  |  |  |  |  |  |  |  |  |  |  |  |  |  |  |  |  |  |  |  |  |  |  |  |  |  |  |  |  |  |  |  |  |  |  |  |  |  |  |  |  |  |  |  |  |  |  |  |  |  |  |  |  |  |  |  |  |  |  |  |  |  |  |  |  |  |  |  |  |  |  |  |  |  |  |  |  |  |  |  |  |  |  |  |  |  |  |  |  |  |  |  |  |  |  |  |  |  |  |  |  |  |  |  |  |  |  |  |  |  |  |  |  |  |  |  |  |  |  |  |  |  |  |  |  |  |  |  |  |  |  |  |  |  |  |  |  |  |  |  |  |  |  |  |  |  |  |  |  |  |  |  |  |  |  |  |  |  |  |  |  |  |  |  |  |  |  |  |  |  |  |  |  |  |  |  |  |  |  |  |  |  |  |  |  |  |  |  |  |  |  |  |  |  |  |  |  |  |  |  |  |  |  |  |  |  |  |  |  |  |  |  |  |  |  |  |  |  |  |  |  |  |  |  |  |  |  |  |  |  |  |  |  |  |  |  |  |  |  |  |  |  |  |  |  |  |  |  |  |  |  |  |  |  |  |  |  |  |  |  |  |  |  |  |  |  |  |  |  |  |  |  |  |  |  |  |  |  |  |  |  |  |  |  |  |  |  |  |  |  |  |  |  |  |  |  |  |  |  |  |  |  |  |  |  |  |  |  |  |  |  |  |  |  |  |  |  |  |  |  |  |  |  |  |
| SPARCI1`CI   | CT        | A         | G         | T         | C         | T         | C         | C         | T         | T         | C         | A         | A         | G         | A         | G | A | G | T | A | T | G | G | A | T | A | T | G | G | A | T | A | T | G | T | T | C | T | G | A | 1884 |   |   |   |   |   |   |   |   |      |   |   |      |  |  |  |  |  |  |  |  |  |  |  |  |  |  |  |  |  |  |  |  |  |  |  |  |  |  |  |  |  |  |  |  |  |  |  |  |  |  |  |  |  |  |  |  |  |  |  |  |  |  |  |  |  |  |  |  |  |  |  |  |  |  |  |  |  |  |  |  |  |  |  |  |  |  |  |  |  |  |  |  |  |  |  |  |  |  |  |  |  |  |  |  |  |  |  |  |  |  |  |  |  |  |  |  |  |  |  |  |  |  |  |  |  |  |  |  |  |  |  |  |  |  |  |  |  |  |  |  |  |  |  |  |  |  |  |  |  |  |  |  |  |  |  |  |  |  |  |  |  |  |  |  |  |  |  |  |  |  |  |  |  |  |  |  |  |  |  |  |  |  |  |  |  |  |  |  |  |  |  |  |  |  |  |  |  |  |  |  |  |  |  |  |  |  |  |  |  |  |  |  |  |  |  |  |  |  |  |  |  |  |  |  |  |  |  |  |  |  |  |  |  |  |  |  |  |  |  |  |  |  |  |  |  |  |  |  |  |  |  |  |  |  |  |  |  |  |  |  |  |  |  |  |  |  |  |  |  |  |  |  |  |  |  |  |  |  |  |  |  |  |  |  |  |  |  |  |  |  |  |  |  |  |  |  |  |  |  |  |  |  |  |  |  |  |  |  |  |  |  |  |  |  |  |  |  |  |  |  |  |  |  |  |  |  |  |  |  |  |  |  |  |  |  |  |  |  |  |  |  |  |  |  |  |  |  |  |  |  |  |  |  |  |  |  |  |  |  |  |  |  |  |  |  |  |  |  |  |  |  |  |  |  |  |  |  |  |  |  |  |  |  |  |  |  |  |  |  |  |  |  |  |  |  |  |  |  |  |  |  |  |  |  |  |  |  |  |  |  |  |  |  |  |  |  |  |  |  |  |  |  |  |  |  |  |  |  |  |  |  |  |  |  |  |  |  |  |  |  |  |  |  |  |  |  |  |  |  |  |  |  |  |  |  |  |  |  |  |  |  |  |  |  |  |  |  |  |  |  |  |  |  |  |  |  |  |  |  |  |  |  |  |  |  |  |  |  |  |  |  |  |  |  |  |  |  |  |  |  |  |  |  |  |  |  |  |  |  |  |  |  |  |  |  |  |  |  |  |  |  |  |  |  |  |  |  |  |  |  |  |  |  |  |  |  |  |  |  |  |  |  |  |  |  |  |  |  |  |  |  |  |  |  |  |  |  |  |  |  |  |  |  |  |  |  |  |  |  |  |  |  |  |  |  |  |  |  |  |  |  |  |  |  |  |  |  |  |  |  |  |  |  |  |  |  |  |  |  |  |  |  |  |  |  |  |  |  |  |  |  |  |  |  |  |  |  |  |  |  |  |  |  |  |  |  |  |  |  |  |  |  |  |  |  |  |  |  |  |  |  |  |  |  |  |  |  |  |  |  |  |  |  |  |  |  |  |  |  |  |  |  |  |  |  |  |  |  |  |  |  |  |  |  |  |  |  |  |  |  |  |  |  |  |  |  |  |  |  |  |  |  |  |  |  |  |  |  |  |  |  |  |  |  |  |  |  |  |  |  |  |  |  |  |  |  |  |  |  |  |  |  |  |  |  |  |  |  |  |  |  |  |  |  |  |  |  |  |  |  |  |  |  |  |  |  |  |  |  |  |  |  |  |  |  |  |  |  |  |  |  |  |  |  |  |  |  |  |  |  |  |  |  |  |  |  |  |  |  |  |  |  |  |  |  |  |  |  |  |  |  |  |  |  |  |  |  |  |  |  |  |  |  |  |  |  |  |  |  |  |  |  |  |  |  |  |  |  |  |  |  |  |  |  |  |  |  |  |  |  |  |  |  |  |  |  |  |  |  |  |  |  |  |  |  |  |  |  |  |  |  |  |  |  |  |  |  |  |  |  |  |  |  |  |  |  |  |  |  |  |  |  |  |  |  |  |  |  |  |  |  |  |  |  |  |  |  |  |  |  |  |  |  |  |  |  |  |  |  |  |  |  |  |  |  |  |  |  |  |  |  |  |  |  |  |  |  |  |  |  |  |  |  |  |  |  |  |  |  |  |  |  |  |  |  |  |  |  |  |  |  |  |  |  |  |  |  |  |  |  |  |  |  |  |  |  |  |  |  |  |  |  |  |  |  |  |  |  |  |  |  |  |  |  |  |  |  |  |  |  |  |  |  |  |  |  |  |  |  |  |  |  |  |  |  |  |  |  |  |  |  |  |  |  |  |  |  |  |  |  |  |  |  |  |  |  |  |  |  |  |  |  |  |  |  |  |  |  |  |  |  |  |  |  |  |  |  |  |  |  |  |  |  |  |  |  |  |  |  |  |  |  |  |  |  |  |  |  |  |  |  |  |  |  |  |  |  |  |  |  |  |  |  |  |  |  |  |  |  |  |  |  |  |  |  |  |  |  |  |  |  |  |  |  |  |  |  |  |  |  |  |  |  |  |  |  |  |  |  |  |  |  |  |  |  |  |  |  |  |  |  |  |  |  |  |  |  |  |  |  |  |  |  |  |  |  |  |  |  |  |  |  |  |  |  |  |  |  |  |  |  |  |  |  |  |  |  |  |  |  |  |  |  |  |  |  |  |  |  |  |  |  |  |  |  |  |  |  |  |  |
| SPARCI1`DR   | CT        | G         | G         | T         | C         | T         | C         | C         | T         | T         | C         | A         | A         | G         | A         | G | T | G | C | A | G | C | T | G | C | T | T | T | G | G | C | A | T | A | A | G | A | G | A | G | A    | T | A | T | G | A | A | T | A | T    | G | A | 1821 |  |  |  |  |  |  |  |  |  |  |  |  |  |  |  |  |  |  |  |  |  |  |  |  |  |  |  |  |  |  |  |  |  |  |  |  |  |  |  |  |  |  |  |  |  |  |  |  |  |  |  |  |  |  |  |  |  |  |  |  |  |  |  |  |  |  |  |  |  |  |  |  |  |  |  |  |  |  |  |  |  |  |  |  |  |  |  |  |  |  |  |  |  |  |  |  |  |  |  |  |  |  |  |  |  |  |  |  |  |  |  |  |  |  |  |  |  |  |  |  |  |  |  |  |  |  |  |  |  |  |  |  |  |  |  |  |  |  |  |  |  |  |  |  |  |  |  |  |  |  |  |  |  |  |  |  |  |  |  |  |  |  |  |  |  |  |  |  |  |  |  |  |  |  |  |  |  |  |  |  |  |  |  |  |  |  |  |  |  |  |  |  |  |  |  |  |  |  |  |  |  |  |  |  |  |  |  |  |  |  |  |  |  |  |  |  |  |  |  |  |  |  |  |  |  |  |  |  |  |  |  |  |  |  |  |  |  |  |  |  |  |  |  |  |  |  |  |  |  |  |  |  |  |  |  |  |  |  |  |  |  |  |  |  |  |  |  |  |  |  |  |  |  |  |  |  |  |  |  |  |  |  |  |  |  |  |  |  |  |  |  |  |  |  |  |  |  |  |  |  |  |  |  |  |  |  |  |  |  |  |  |  |  |  |  |  |  |  |  |  |  |  |  |  |  |  |  |  |  |  |  |  |  |  |  |  |  |  |  |  |  |  |  |  |  |  |  |  |  |  |  |  |  |  |  |  |  |  |  |  |  |  |  |  |  |  |  |  |  |  |  |  |  |  |  |  |  |  |  |  |  |  |  |  |  |  |  |  |  |  |  |  |  |  |  |  |  |  |  |  |  |  |  |  |  |  |  |  |  |  |  |  |  |  |  |  |  |  |  |  |  |  |  |  |  |  |  |  |  |  |  |  |  |  |  |  |  |  |  |  |  |  |  |  |  |  |  |  |  |  |  |  |  |  |  |  |  |  |  |  |  |  |  |  |  |  |  |  |  |  |  |  |  |  |  |  |  |  |  |  |  |  |  |  |  |  |  |  |  |  |  |  |  |  |  |  |  |  |  |  |  |  |  |  |  |  |  |  |  |  |  |  |  |  |  |  |  |  |  |  |  |  |  |  |  |  |  |  |  |  |  |  |  |  |  |  |  |  |  |  |  |  |  |  |  |  |  |  |  |  |  |  |  |  |  |  |  |  |  |  |  |  |  |  |  |  |  |  |  |  |  |  |  |  |  |  |  |  |  |  |  |  |  |  |  |  |  |  |  |  |  |  |  |  |  |  |  |  |  |  |  |  |  |  |  |  |  |  |  |  |  |  |  |  |  |  |  |  |  |  |  |  |  |  |  |  |  |  |  |  |  |  |  |  |  |  |  |  |  |  |  |  |  |  |  |  |  |  |  |  |  |  |  |  |  |  |  |  |  |  |  |  |  |  |  |  |  |  |  |  |  |  |  |  |  |  |  |  |  |  |  |  |  |  |  |  |  |  |  |  |  |  |  |  |  |  |  |  |  |  |  |  |  |  |  |  |  |  |  |  |  |  |  |  |  |  |  |  |  |  |  |  |  |  |  |  |  |  |  |  |  |  |  |  |  |  |  |  |  |  |  |  |  |  |  |  |  |  |  |  |  |  |  |  |  |  |  |  |  |  |  |  |  |  |  |  |  |  |  |  |  |  |  |  |  |  |  |  |  |  |  |  |  |  |  |  |  |  |  |  |  |  |  |  |  |  |  |  |  |  |  |  |  |  |  |  |  |  |  |  |  |  |  |  |  |  |  |  |  |  |  |  |  |  |  |  |  |  |  |  |  |  |  |  |  |  |  |  |  |  |  |  |  |  |  |  |  |  |  |  |  |  |  |  |  |  |  |  |  |  |  |  |  |  |  |  |  |  |  |  |  |  |  |  |  |  |  |  |  |  |  |  |  |  |  |  |  |  |  |  |  |  |  |  |  |  |  |  |  |  |  |  |  |  |  |  |  |  |  |  |  |  |  |  |  |  |  |  |  |  |  |  |  |  |  |  |  |  |  |  |  |  |  |  |  |  |  |  |  |  |  |  |  |  |  |  |  |  |  |  |  |  |  |  |  |  |  |  |  |  |  |  |  |  |  |  |  |  |  |  |  |  |  |  |  |  |  |  |  |  |  |  |  |  |  |  |  |  |  |  |  |  |  |  |  |  |  |  |  |  |  |  |  |  |  |  |  |  |  |  |  |  |  |  |  |  |  |  |  |  |  |  |  |  |  |  |  |  |  |  |  |  |  |  |  |  |  |  |  |  |  |  |  |  |  |  |  |  |  |  |  |  |  |  |  |  |  |  |  |  |  |  |  |  |  |  |  |  |  |  |  |  |  |  |  |  |  |  |  |  |  |  |  |  |  |  |  |  |  |  |  |  |  |  |  |  |  |  |  |  |  |  |  |  |  |  |  |  |  |  |  |  |  |  |  |  |  |  |  |  |  |  |  |  |  |  |  |  |  |  |  |  |  |  |  |  |  |  |  |  |  |  |  |  |  |  |  |  |  |  |  |  |  |  |  |  |  |  |  |  |  |  |  |  |  |  |  |  |
| SPARCI1`IP   | CT        | A         | C         | T         | C         | T         | C         | T         | T         | T         | C         | A         | G         | G         | A         | G | T | G | G | T | G | C | A | G | T | G | T | T | T | C | G | G | C | A | T | A | A | G | A | T | G    | A | G | A | T | A | T | G | A | 1827 |   |   |      |  |  |  |  |  |  |  |  |  |  |  |  |  |  |  |  |  |  |  |  |  |  |  |  |  |  |  |  |  |  |  |  |  |  |  |  |  |  |  |  |  |  |  |  |  |  |  |  |  |  |  |  |  |  |  |  |  |  |  |  |  |  |  |  |  |  |  |  |  |  |  |  |  |  |  |  |  |  |  |  |  |  |  |  |  |  |  |  |  |  |  |  |  |  |  |  |  |  |  |  |  |  |  |  |  |  |  |  |  |  |  |  |  |  |  |  |  |  |  |  |  |  |  |  |  |  |  |  |  |  |  |  |  |  |  |  |  |  |  |  |  |  |  |  |  |  |  |  |  |  |  |  |  |  |  |  |  |  |  |  |  |  |  |  |  |  |  |  |  |  |  |  |  |  |  |  |  |  |  |  |  |  |  |  |  |  |  |  |  |  |  |  |  |  |  |  |  |  |  |  |  |  |  |  |  |  |  |  |  |  |  |  |  |  |  |  |  |  |  |  |  |  |  |  |  |  |  |  |  |  |  |  |  |  |  |  |  |  |  |  |  |  |  |  |  |  |  |  |  |  |  |  |  |  |  |  |  |  |  |  |  |  |  |  |  |  |  |  |  |  |  |  |  |  |  |  |  |  |  |  |  |  |  |  |  |  |  |  |  |  |  |  |  |  |  |  |  |  |  |  |  |  |  |  |  |  |  |  |  |  |  |  |  |  |  |  |  |  |  |  |  |  |  |  |  |  |  |  |  |  |  |  |  |  |  |  |  |  |  |  |  |  |  |  |  |  |  |  |  |  |  |  |  |  |  |  |  |  |  |  |  |  |  |  |  |  |  |  |  |  |  |  |  |  |  |  |  |  |  |  |  |  |  |  |  |  |  |  |  |  |  |  |  |  |  |  |  |  |  |  |  |  |  |  |  |  |  |  |  |  |  |  |  |  |  |  |  |  |  |  |  |  |  |  |  |  |  |  |  |  |  |  |  |  |  |  |  |  |  |  |  |  |  |  |  |  |  |  |  |  |  |  |  |  |  |  |  |  |  |  |  |  |  |  |  |  |  |  |  |  |  |  |  |  |  |  |  |  |  |  |  |  |  |  |  |  |  |  |  |  |  |  |  |  |  |  |  |  |  |  |  |  |  |  |  |  |  |  |  |  |  |  |  |  |  |  |  |  |  |  |  |  |  |  |  |  |  |  |  |  |  |  |  |  |  |  |  |  |  |  |  |  |  |  |  |  |  |  |  |  |  |  |  |  |  |  |  |  |  |  |  |  |  |  |  |  |  |  |  |  |  |  |  |  |  |  |  |  |  |  |  |  |  |  |  |  |  |  |  |  |  |  |  |  |  |  |  |  |  |  |  |  |  |  |  |  |  |  |  |  |  |  |  |  |  |  |  |  |  |  |  |  |  |  |  |  |  |  |  |  |  |  |  |  |  |  |  |  |  |  |  |  |  |  |  |  |  |  |  |  |  |  |  |  |  |  |  |  |  |  |  |  |  |  |  |  |  |  |  |  |  |  |  |  |  |  |  |  |  |  |  |  |  |  |  |  |  |  |  |  |  |  |  |  |  |  |  |  |  |  |  |  |  |  |  |  |  |  |  |  |  |  |  |  |  |  |  |  |  |  |  |  |  |  |  |  |  |  |  |  |  |  |  |  |  |  |  |  |  |  |  |  |  |  |  |  |  |  |  |  |  |  |  |  |  |  |  |  |  |  |  |  |  |  |  |  |  |  |  |  |  |  |  |  |  |  |  |  |  |  |  |  |  |  |  |  |  |  |  |  |  |  |  |  |  |  |  |  |  |  |  |  |  |  |  |  |  |  |  |  |  |  |  |  |  |  |  |  |  |  |  |  |  |  |  |  |  |  |  |  |  |  |  |  |  |  |  |  |  |  |  |  |  |  |  |  |  |  |  |  |  |  |  |  |  |  |  |  |  |  |  |  |  |  |  |  |  |  |  |  |  |  |  |  |  |  |  |  |  |  |  |  |  |  |  |  |  |  |  |  |  |  |  |  |  |  |  |  |  |  |  |  |  |  |  |  |  |  |  |  |  |  |  |  |  |  |  |  |  |  |  |  |  |  |  |  |  |  |  |  |  |  |  |  |  |  |  |  |  |  |  |  |  |  |  |  |  |  |  |  |  |  |  |  |  |  |  |  |  |  |  |  |  |  |  |  |  |  |  |  |  |  |  |  |  |  |  |  |  |  |  |  |  |  |  |  |  |  |  |  |  |  |  |  |  |  |  |  |  |  |  |  |  |  |  |  |  |  |  |  |  |  |  |  |  |  |  |  |  |  |  |  |  |  |  |  |  |  |  |  |  |  |  |  |  |  |  |  |  |  |  |  |  |  |  |  |  |  |  |  |  |  |  |  |  |  |  |  |  |  |  |  |  |  |  |  |  |  |  |  |  |  |  |  |  |  |  |  |  |  |  |  |  |  |  |  |  |  |  |  |  |  |  |  |  |  |  |  |  |  |  |  |  |  |  |  |  |  |  |  |  |  |  |  |  |  |  |  |  |  |  |  |  |  |  |  |  |  |  |  |  |  |  |  |  |  |  |  |  |  |  |  |  |  |  |  |  |  |  |  |  |  |  |  |  |  |  |  |  |  |  |  |  |  |  |  |  |  |
| SPARCI1`LW   | CT        | T         | G         | T         | C         | T         | C         | C         | T         | T         | C         | A         | A         | G         | A         | G | T | G | C | A | G | C | T | G | C | T | T | T | T | G | G | C | A | T | A | A | A | G | A | G | A    | T | A | T | G | A | T | T | A | T    | G | A | 1884 |  |  |  |  |  |  |  |  |  |  |  |  |  |  |  |  |  |  |  |  |  |  |  |  |  |  |  |  |  |  |  |  |  |  |  |  |  |  |  |  |  |  |  |  |  |  |  |  |  |  |  |  |  |  |  |  |  |  |  |  |  |  |  |  |  |  |  |  |  |  |  |  |  |  |  |  |  |  |  |  |  |  |  |  |  |  |  |  |  |  |  |  |  |  |  |  |  |  |  |  |  |  |  |  |  |  |  |  |  |  |  |  |  |  |  |  |  |  |  |  |  |  |  |  |  |  |  |  |  |  |  |  |  |  |  |  |  |  |  |  |  |  |  |  |  |  |  |  |  |  |  |  |  |  |  |  |  |  |  |  |  |  |  |  |  |  |  |  |  |  |  |  |  |  |  |  |  |  |  |  |  |  |  |  |  |  |  |  |  |  |  |  |  |  |  |  |  |  |  |  |  |  |  |  |  |  |  |  |  |  |  |  |  |  |  |  |  |  |  |  |  |  |  |  |  |  |  |  |  |  |  |  |  |  |  |  |  |  |  |  |  |  |  |  |  |  |  |  |  |  |  |  |  |  |  |  |  |  |  |  |  |  |  |  |  |  |  |  |  |  |  |  |  |  |  |  |  |  |  |  |  |  |  |  |  |  |  |  |  |  |  |  |  |  |  |  |  |  |  |  |  |  |  |  |  |  |  |  |  |  |  |  |  |  |  |  |  |  |  |  |  |  |  |  |  |  |  |  |  |  |  |  |  |  |  |  |  |  |  |  |  |  |  |  |  |  |  |  |  |  |  |  |  |  |  |  |  |  |  |  |  |  |  |  |  |  |  |  |  |  |  |  |  |  |  |  |  |  |  |  |  |  |  |  |  |  |  |  |  |  |  |  |  |  |  |  |  |  |  |  |  |  |  |  |  |  |  |  |  |  |  |  |  |  |  |  |  |  |  |  |  |  |  |  |  |  |  |  |  |  |  |  |  |  |  |  |  |  |  |  |  |  |  |  |  |  |  |  |  |  |  |  |  |  |  |  |  |  |  |  |  |  |  |  |  |  |  |  |  |  |  |  |  |  |  |  |  |  |  |  |  |  |  |  |  |  |  |  |  |  |  |  |  |  |  |  |  |  |  |  |  |  |  |  |  |  |  |  |  |  |  |  |  |  |  |  |  |  |  |  |  |  |  |  |  |  |  |  |  |  |  |  |  |  |  |  |  |  |  |  |  |  |  |  |  |  |  |  |  |  |  |  |  |  |  |  |  |  |  |  |  |  |  |  |  |  |  |  |  |  |  |  |  |  |  |  |  |  |  |  |  |  |  |  |  |  |  |  |  |  |  |  |  |  |  |  |  |  |  |  |  |  |  |  |  |  |  |  |  |  |  |  |  |  |  |  |  |  |  |  |  |  |  |  |  |  |  |  |  |  |  |  |  |  |  |  |  |  |  |  |  |  |  |  |  |  |  |  |  |  |  |  |  |  |  |  |  |  |  |  |  |  |  |  |  |  |  |  |  |  |  |  |  |  |  |  |  |  |  |  |  |  |  |  |  |  |  |  |  |  |  |  |  |  |  |  |  |  |  |  |  |  |  |  |  |  |  |  |  |  |  |  |  |  |  |  |  |  |  |  |  |  |  |  |  |  |  |  |  |  |  |  |  |  |  |  |  |  |  |  |  |  |  |  |  |  |  |  |  |  |  |  |  |  |  |  |  |  |  |  |  |  |  |  |  |  |  |  |  |  |  |  |  |  |  |  |  |  |  |  |  |  |  |  |  |  |  |  |  |  |  |  |  |  |  |  |  |  |  |  |  |  |  |  |  |  |  |  |  |  |  |  |  |  |  |  |  |  |  |  |  |  |  |  |  |  |  |  |  |  |  |  |  |  |  |  |  |  |  |  |  |  |  |  |  |  |  |  |  |  |  |  |  |  |  |  |  |  |  |  |  |  |  |  |  |  |  |  |  |  |  |  |  |  |  |  |  |  |  |  |  |  |  |  |  |  |  |  |  |  |  |  |  |  |  |  |  |  |  |  |  |  |  |  |  |  |  |  |  |  |  |  |  |  |  |  |  |  |  |  |  |  |  |  |  |  |  |  |  |  |  |  |  |  |  |  |  |  |  |  |  |  |  |  |  |  |  |  |  |  |  |  |  |  |  |  |  |  |  |  |  |  |  |  |  |  |  |  |  |  |  |  |  |  |  |  |  |  |  |  |  |  |  |  |  |  |  |  |  |  |  |  |  |  |  |  |  |  |  |  |  |  |  |  |  |  |  |  |  |  |  |  |  |  |  |  |  |  |  |  |  |  |  |  |  |  |  |  |  |  |  |  |  |  |  |  |  |  |  |  |  |  |  |  |  |  |  |  |  |  |  |  |  |  |  |  |  |  |  |  |  |  |  |  |  |  |  |  |  |  |  |  |  |  |  |  |  |  |  |  |  |  |  |  |  |  |  |  |  |  |  |  |  |  |  |  |  |  |  |  |  |  |  |  |  |  |  |  |  |  |  |  |  |  |  |  |  |  |  |  |  |  |  |  |  |  |  |  |  |  |  |  |  |  |  |  |  |  |  |  |  |  |  |  |  |  |  |  |  |  |  |  |  |  |  |  |  |  |  |  |  |  |  |  |  |  |  |  |
| SPARCI1`PN   | CT        | G         | G         | T         | C         | T         | C         | C         | T         | T         | C         | A         | G         | G         | A         | G | T | G | G | T | G | C | C | A | A | T | G | T | T | T | C | G | G | C | A | T | A | A | G | A | G    | A | T | A | T | G | A | T | A | T    | G | A | 1812 |  |  |  |  |  |  |  |  |  |  |  |  |  |  |  |  |  |  |  |  |  |  |  |  |  |  |  |  |  |  |  |  |  |  |  |  |  |  |  |  |  |  |  |  |  |  |  |  |  |  |  |  |  |  |  |  |  |  |  |  |  |  |  |  |  |  |  |  |  |  |  |  |  |  |  |  |  |  |  |  |  |  |  |  |  |  |  |  |  |  |  |  |  |  |  |  |  |  |  |  |  |  |  |  |  |  |  |  |  |  |  |  |  |  |  |  |  |  |  |  |  |  |  |  |  |  |  |  |  |  |  |  |  |  |  |  |  |  |  |  |  |  |  |  |  |  |  |  |  |  |  |  |  |  |  |  |  |  |  |  |  |  |  |  |  |  |  |  |  |  |  |  |  |  |  |  |  |  |  |  |  |  |  |  |  |  |  |  |  |  |  |  |  |  |  |  |  |  |  |  |  |  |  |  |  |  |  |  |  |  |  |  |  |  |  |  |  |  |  |  |  |  |  |  |  |  |  |  |  |  |  |  |  |  |  |  |  |  |  |  |  |  |  |  |  |  |  |  |  |  |  |  |  |  |  |  |  |  |  |  |  |  |  |  |  |  |  |  |  |  |  |  |  |  |  |  |  |  |  |  |  |  |  |  |  |  |  |  |  |  |  |  |  |  |  |  |  |  |  |  |  |  |  |  |  |  |  |  |  |  |  |  |  |  |  |  |  |  |  |  |  |  |  |  |  |  |  |  |  |  |  |  |  |  |  |  |  |  |  |  |  |  |  |  |  |  |  |  |  |  |  |  |  |  |  |  |  |  |  |  |  |  |  |  |  |  |  |  |  |  |  |  |  |  |  |  |  |  |  |  |  |  |  |  |  |  |  |  |  |  |  |  |  |  |  |  |  |  |  |  |  |  |  |  |  |  |  |  |  |  |  |  |  |  |  |  |  |  |  |  |  |  |  |  |  |  |  |  |  |  |  |  |  |  |  |  |  |  |  |  |  |  |  |  |  |  |  |  |  |  |  |  |  |  |  |  |  |  |  |  |  |  |  |  |  |  |  |  |  |  |  |  |  |  |  |  |  |  |  |  |  |  |  |  |  |  |  |  |  |  |  |  |  |  |  |  |  |  |  |  |  |  |  |  |  |  |  |  |  |  |  |  |  |  |  |  |  |  |  |  |  |  |  |  |  |  |  |  |  |  |  |  |  |  |  |  |  |  |  |  |  |  |  |  |  |  |  |  |  |  |  |  |  |  |  |  |  |  |  |  |  |  |  |  |  |  |  |  |  |  |  |  |  |  |  |  |  |  |  |  |  |  |  |  |  |  |  |  |  |  |  |  |  |  |  |  |  |  |  |  |  |  |  |  |  |  |  |  |  |  |  |  |  |  |  |  |  |  |  |  |  |  |  |  |  |  |  |  |  |  |  |  |  |  |  |  |  |  |  |  |  |  |  |  |  |  |  |  |  |  |  |  |  |  |  |  |  |  |  |  |  |  |  |  |  |  |  |  |  |  |  |  |  |  |  |  |  |  |  |  |  |  |  |  |  |  |  |  |  |  |  |  |  |  |  |  |  |  |  |  |  |  |  |  |  |  |  |  |  |  |  |  |  |  |  |  |  |  |  |  |  |  |  |  |  |  |  |  |  |  |  |  |  |  |  |  |  |  |  |  |  |  |  |  |  |  |  |  |  |  |  |  |  |  |  |  |  |  |  |  |  |  |  |  |  |  |  |  |  |  |  |  |  |  |  |  |  |  |  |  |  |  |  |  |  |  |  |  |  |  |  |  |  |  |  |  |  |  |  |  |  |  |  |  |  |  |  |  |  |  |  |  |  |  |  |  |  |  |  |  |  |  |  |  |  |  |  |  |  |  |  |  |  |  |  |  |  |  |  |  |  |  |  |  |  |  |  |  |  |  |  |  |  |  |  |  |  |  |  |  |  |  |  |  |  |  |  |  |  |  |  |  |  |  |  |  |  |  |  |  |  |  |  |  |  |  |  |  |  |  |  |  |  |  |  |  |  |  |  |  |  |  |  |  |  |  |  |  |  |  |  |  |  |  |  |  |  |  |  |  |  |  |  |  |  |  |  |  |  |  |  |  |  |  |  |  |  |  |  |  |  |  |  |  |  |  |  |  |  |  |  |  |  |  |  |  |  |  |  |  |  |  |  |  |  |  |  |  |  |  |  |  |  |  |  |  |  |  |  |  |  |  |  |  |  |  |  |  |  |  |  |  |  |  |  |  |  |  |  |  |  |  |  |  |  |  |  |  |  |  |  |  |  |  |  |  |  |  |  |  |  |  |  |  |  |  |  |  |  |  |  |  |  |  |  |  |  |  |  |  |  |  |  |  |  |  |  |  |  |  |  |  |  |  |  |  |  |  |  |  |  |  |  |  |  |  |  |  |  |  |  |  |  |  |  |  |  |  |  |  |  |  |  |  |  |  |  |  |  |  |  |  |  |  |  |  |  |  |  |  |  |  |  |  |  |  |  |  |  |  |  |  |  |  |  |  |  |  |  |  |  |  |  |  |  |  |  |  |  |  |  |  |  |  |  |  |  |  |  |  |  |  |  |  |  |  |  |  |  |  |  |  |  |  |  |  |  |  |  |  |  |  |  |  |  |  |  |  |
| SPARCI1`PP   | CT        | A         | G         | T         | C         | T         | C         | C         | T         | T         | C         | A         | A         | G         | A         | G | T | G | C | A | G | C | T | G | C | T | T | T | T | G | G | C | A | T | A | A | A | G | A | G | A    | T | A | T | G | A | T | T | A | T    | G | A | 1827 |  |  |  |  |  |  |  |  |  |  |  |  |  |  |  |  |  |  |  |  |  |  |  |  |  |  |  |  |  |  |  |  |  |  |  |  |  |  |  |  |  |  |  |  |  |  |  |  |  |  |  |  |  |  |  |  |  |  |  |  |  |  |  |  |  |  |  |  |  |  |  |  |  |  |  |  |  |  |  |  |  |  |  |  |  |  |  |  |  |  |  |  |  |  |  |  |  |  |  |  |  |  |  |  |  |  |  |  |  |  |  |  |  |  |  |  |  |  |  |  |  |  |  |  |  |  |  |  |  |  |  |  |  |  |  |  |  |  |  |  |  |  |  |  |  |  |  |  |  |  |  |  |  |  |  |  |  |  |  |  |  |  |  |  |  |  |  |  |  |  |  |  |  |  |  |  |  |  |  |  |  |  |  |  |  |  |  |  |  |  |  |  |  |  |  |  |  |  |  |  |  |  |  |  |  |  |  |  |  |  |  |  |  |  |  |  |  |  |  |  |  |  |  |  |  |  |  |  |  |  |  |  |  |  |  |  |  |  |  |  |  |  |  |  |  |  |  |  |  |  |  |  |  |  |  |  |  |  |  |  |  |  |  |  |  |  |  |  |  |  |  |  |  |  |  |  |  |  |  |  |  |  |  |  |  |  |  |  |  |  |  |  |  |  |  |  |  |  |  |  |  |  |  |  |  |  |  |  |  |  |  |  |  |  |  |  |  |  |  |  |  |  |  |  |  |  |  |  |  |  |  |  |  |  |  |  |  |  |  |  |  |  |  |  |  |  |  |  |  |  |  |  |  |  |  |  |  |  |  |  |  |  |  |  |  |  |  |  |  |  |  |  |  |  |  |  |  |  |  |  |  |  |  |  |  |  |  |  |  |  |  |  |  |  |  |  |  |  |  |  |  |  |  |  |  |  |  |  |  |  |  |  |  |  |  |  |  |  |  |  |  |  |  |  |  |  |  |  |  |  |  |  |  |  |  |  |  |  |  |  |  |  |  |  |  |  |  |  |  |  |  |  |  |  |  |  |  |  |  |  |  |  |  |  |  |  |  |  |  |  |  |  |  |  |  |  |  |  |  |  |  |  |  |  |  |  |  |  |  |  |  |  |  |  |  |  |  |  |  |  |  |  |  |  |  |  |  |  |  |  |  |  |  |  |  |  |  |  |  |  |  |  |  |  |  |  |  |  |  |  |  |  |  |  |  |  |  |  |  |  |  |  |  |  |  |  |  |  |  |  |  |  |  |  |  |  |  |  |  |  |  |  |  |  |  |  |  |  |  |  |  |  |  |  |  |  |  |  |  |  |  |  |  |  |  |  |  |  |  |  |  |  |  |  |  |  |  |  |  |  |  |  |  |  |  |  |  |  |  |  |  |  |  |  |  |  |  |  |  |  |  |  |  |  |  |  |  |  |  |  |  |  |  |  |  |  |  |  |  |  |  |  |  |  |  |  |  |  |  |  |  |  |  |  |  |  |  |  |  |  |  |  |  |  |  |  |  |  |  |  |  |  |  |  |  |  |  |  |  |  |  |  |  |  |  |  |  |  |  |  |  |  |  |  |  |  |  |  |  |  |  |  |  |  |  |  |  |  |  |  |  |  |  |  |  |  |  |  |  |  |  |  |  |  |  |  |  |  |  |  |  |  |  |  |  |  |  |  |  |  |  |  |  |  |  |  |  |  |  |  |  |  |  |  |  |  |  |  |  |  |  |  |  |  |  |  |  |  |  |  |  |  |  |  |  |  |  |  |  |  |  |  |  |  |  |  |  |  |  |  |  |  |  |  |  |  |  |  |  |  |  |  |  |  |  |  |  |  |  |  |  |  |  |  |  |  |  |  |  |  |  |  |  |  |  |  |  |  |  |  |  |  |  |  |  |  |  |  |  |  |  |  |  |  |  |  |  |  |  |  |  |  |  |  |  |  |  |  |  |  |  |  |  |  |  |  |  |  |  |  |  |  |  |  |  |  |  |  |  |  |  |  |  |  |  |  |  |  |  |  |  |  |  |  |  |  |  |  |  |  |  |  |  |  |  |  |  |  |  |  |  |  |  |  |  |  |  |  |  |  |  |  |  |  |  |  |  |  |  |  |  |  |  |  |  |  |  |  |  |  |  |  |  |  |  |  |  |  |  |  |  |  |  |  |  |  |  |  |  |  |  |  |  |  |  |  |  |  |  |  |  |  |  |  |  |  |  |  |  |  |  |  |  |  |  |  |  |  |  |  |  |  |  |  |  |  |  |  |  |  |  |  |  |  |  |  |  |  |  |  |  |  |  |  |  |  |  |  |  |  |  |  |  |  |  |  |  |  |  |  |  |  |  |  |  |  |  |  |  |  |  |  |  |  |  |  |  |  |  |  |  |  |  |  |  |  |  |  |  |  |  |  |  |  |  |  |  |  |  |  |  |  |  |  |  |  |  |  |  |  |  |  |  |  |  |  |  |  |  |  |  |  |  |  |  |  |  |  |  |  |  |  |  |  |  |  |  |  |  |  |  |  |  |  |  |  |  |  |  |  |  |  |  |  |  |  |  |  |  |  |  |  |  |  |  |  |  |  |  |  |  |  |  |  |  |  |  |  |  |  |  |  |  |  |  |  |  |  |  |  |  |  |  |  |  |  |  |  |
| SPARCI1-AM   |           |           |           |           |           |           |           |           |           |           |           |           |           |           |           |   |   |   |   |   |   |   |   |   |   |   |   |   |   |   |   |   |   |   |   |   |   |   |   |   |      |   |   |   |   |   |   |   |   |      |   |   |      |  |  |  |  |  |  |  |  |  |  |  |  |  |  |  |  |  |  |  |  |  |  |  |  |  |  |  |  |  |  |  |  |  |  |  |  |  |  |  |  |  |  |  |  |  |  |  |  |  |  |  |  |  |  |  |  |  |  |  |  |  |  |  |  |  |  |  |  |  |  |  |  |  |  |  |  |  |  |  |  |  |  |  |  |  |  |  |  |  |  |  |  |  |  |  |  |  |  |  |  |  |  |  |  |  |  |  |  |  |  |  |  |  |  |  |  |  |  |  |  |  |  |  |  |  |  |  |  |  |  |  |  |  |  |  |  |  |  |  |  |  |  |  |  |  |  |  |  |  |  |  |  |  |  |  |  |  |  |  |  |  |  |  |  |  |  |  |  |  |  |  |  |  |  |  |  |  |  |  |  |  |  |  |  |  |  |  |  |  |  |  |  |  |  |  |  |  |  |  |  |  |  |  |  |  |  |  |  |  |  |  |  |  |  |  |  |  |  |  |  |  |  |  |  |  |  |  |  |  |  |  |  |  |  |  |  |  |  |  |  |  |  |  |  |  |  |  |  |  |  |  |  |  |  |  |  |  |  |  |  |  |  |  |  |  |  |  |  |  |  |  |  |  |  |  |  |  |  |  |  |  |  |  |  |  |  |  |  |  |  |  |  |  |  |  |  |  |  |  |  |  |  |  |  |  |  |  |  |  |  |  |  |  |  |  |  |  |  |  |  |  |  |  |  |  |  |  |  |  |  |  |  |  |  |  |  |  |  |  |  |  |  |  |  |  |  |  |  |  |  |  |  |  |  |  |  |  |  |  |  |  |  |  |  |  |  |  |  |  |  |  |  |  |  |  |  |  |  |  |  |  |  |  |  |  |  |  |  |  |  |  |  |  |  |  |  |  |  |  |  |  |  |  |  |  |  |  |  |  |  |  |  |  |  |  |  |  |  |  |  |  |  |  |  |  |  |  |  |  |  |  |  |  |  |  |  |  |  |  |  |  |  |  |  |  |  |  |  |  |  |  |  |  |  |  |  |  |  |  |  |  |  |  |  |  |  |  |  |  |  |  |  |  |  |  |  |  |  |  |  |  |  |  |  |  |  |  |  |  |  |  |  |  |  |  |  |  |  |  |  |  |  |  |  |  |  |  |  |  |  |  |  |  |  |  |  |  |  |  |  |  |  |  |  |  |  |  |  |  |  |  |  |  |  |  |  |  |  |  |  |  |  |  |  |  |  |  |  |  |  |  |  |  |  |  |  |  |  |  |  |  |  |  |  |  |  |  |  |  |  |  |  |  |  |  |  |  |  |  |  |  |  |  |  |  |  |  |  |  |  |  |  |  |  |  |  |  |  |  |  |  |  |  |  |  |  |  |  |  |  |  |  |  |  |  |  |  |  |  |  |  |  |  |  |  |  |  |  |  |  |  |  |  |  |  |  |  |  |  |  |  |  |  |  |  |  |  |  |  |  |  |  |  |  |  |  |  |  |  |  |  |  |  |  |  |  |  |  |  |  |  |  |  |  |  |  |  |  |  |  |  |  |  |  |  |  |  |  |  |  |  |  |  |  |  |  |  |  |  |  |  |  |  |  |  |  |  |  |  |  |  |  |  |  |  |  |  |  |  |  |  |  |  |  |  |  |  |  |  |  |  |  |  |  |  |  |  |  |  |  |  |  |  |  |  |  |  |  |  |  |  |  |  |  |  |  |  |  |  |  |  |  |  |  |  |  |  |  |  |  |  |  |  |  |  |  |  |  |  |  |  |  |  |  |  |  |  |  |  |  |  |  |  |  |  |  |  |  |  |  |  |  |  |  |  |  |  |  |  |  |  |  |  |  |  |  |  |  |  |  |  |  |  |  |  |  |  |  |  |  |  |  |  |  |  |  |  |  |  |  |  |  |  |  |  |  |  |  |  |  |  |  |  |  |  |  |  |  |  |  |  |  |  |  |  |  |  |  |  |  |  |  |  |  |  |  |  |  |  |  |  |  |  |  |  |  |  |  |  |  |  |  |  |  |  |  |  |  |  |  |  |  |  |  |  |  |  |  |  |  |  |  |  |  |  |  |  |  |  |  |  |  |  |  |  |  |  |  |  |  |  |  |  |  |  |  |  |  |  |  |  |  |  |  |  |  |  |  |  |  |  |  |  |  |  |  |  |  |  |  |  |  |  |  |  |  |  |  |  |  |  |  |  |  |  |  |  |  |  |  |  |  |  |  |  |  |  |  |  |  |  |  |  |  |  |  |  |  |  |  |  |  |  |  |  |  |  |  |  |  |  |  |  |  |  |  |  |  |  |  |  |  |  |  |  |  |  |  |  |  |  |  |  |  |  |  |  |  |  |  |  |  |  |  |  |  |  |  |  |  |  |  |  |  |  |  |  |  |  |  |  |  |  |  |  |  |  |  |  |  |  |  |  |  |  |  |  |  |  |  |  |  |  |  |  |  |  |  |  |  |  |  |  |  |  |  |  |  |  |  |  |  |  |  |  |  |  |  |  |  |  |  |  |  |  |  |  |  |  |  |  |  |  |  |  |  |  |  |  |  |  |  |  |  |  |  |  |  |  |  |  |  |  |  |  |  |  |  |  |  |  |  |  |  |  |  |  |  |  |  |  |  |  |  |  |  |  |  |

- ☒ non conserved
- ☒ ≥ 55% conserved
- ☒ ≥ 85% conserved
