# Supplementary material for: A Genomic Survey of SCPP Family Genes in Fishes Provides Novel Insights into the Evolution of Fish Scales
Source: MDPI journal article supplement (doi:10.3390/ijms18112432), 2017-11-16
Supplement: s1 [file s1]

|              |       |       |       |       |       |       |       |       |       |       |       |       |       |       |       |       |    |
|--------------|-------|-------|-------|-------|-------|-------|-------|-------|-------|-------|-------|-------|-------|-------|-------|-------|----|
|              | 5     | 10    | 15    | 20    | 25    | 30    | 35    | 40    | 45    | 50    | 55    | 60    | 65    | 70    | 75    | 80    |    |
| conservation | ***** | ***** | ***** | ***** | ***** | ***** | ***** | ***** | ***** | ***** | ***** | ***** | ***** | ***** | ***** | ***** |    |
| ODAM'IP      | A     | C     | A     | T     | T     | C     | T     | C     | A     | G     | T     | G     | A     | G     | C     | T     | 80 |
| ODAM'LV      | ..... | ..... | ..... | ..... | ..... | ..... | ..... | ..... | ..... | ..... | ..... | ..... | ..... | ..... | ..... | ..... | 56 |
| ODAM'PP      | A     | T     | C     | T     | T     | T     | T     | T     | C     | A     | T     | T     | T     | C     | A     | G     | 95 |
| ODAM-CI      | G     | T     | C     | T     | T     | T     | T     | T     | C     | A     | T     | T     | T     | C     | A     | G     | 95 |
| ODAM-DR      | A     | C     | T     | T     | T     | T     | T     | T     | C     | A     | T     | T     | T     | C     | A     | G     | 95 |
| ODAM-PN      | A     | C     | C     | G     | T     | T     | C     | A     | T     | T     | T     | T     | C     | A     | G     | 95    |    |
| ODAM-C1'CC   | A     | T     | C     | T     | T     | T     | T     | T     | C     | A     | T     | T     | T     | C     | A     | G     | 95 |
| ODAM-C2'CC   | A     | T     | C     | T     | T     | T     | T     | T     | C     | A     | T     | T     | T     | C     | A     | G     | 95 |
| ODAM-C1'SA   | ..... | ..... | ..... | ..... | ..... | ..... | ..... | ..... | ..... | ..... | ..... | ..... | ..... | ..... | ..... | 38    |    |
| ODAM-C2'SA   | A     | T     | C     | T     | T     | T     | T     | T     | C     | A     | T     | T     | T     | C     | A     | G     | 95 |
| ODAM'SR      | A     | T     | C     | T     | T     | T     | T     | T     | C     | A     | T     | T     | T     | C     | A     | G     | 95 |
| ODAM-C1'SG   | G     | T     | C     | T     | T     | T     | T     | T     | C     | A     | T     | T     | T     | C     | A     | G     | 95 |
| ODAM-C2'SG   | A     | T     | C     | T     | T     | T     | T     | T     | C     | A     | T     | T     | T     | C     | A     | G     | 95 |

|              |       |       |       |       |       |       |       |       |       |       |       |       |       |       |       |       |     |
|--------------|-------|-------|-------|-------|-------|-------|-------|-------|-------|-------|-------|-------|-------|-------|-------|-------|-----|
|              | 85    | 90    | 95    | 100   | 105   | 110   | 115   | 120   | 125   | 130   | 135   | 140   | 145   | 150   | 155   | 160   |     |
| conservation | ***** | ***** | ***** | ***** | ***** | ***** | ***** | ***** | ***** | ***** | ***** | ***** | ***** | ***** | ***** | ***** |     |
| ODAM'IP      | C     | A     | G     | C     | A     | A     | T     | G     | A     | T     | T     | G     | T     | G     | C     | C     | 160 |
| ODAM'LV      | C     | A     | G     | T     | A     | A     | C     | G     | A     | G     | G     | T     | T     | T     | T     | T     | 136 |
| ODAM'PP      | C     | A     | G     | T     | A     | A     | C     | G     | A     | G     | G     | T     | T     | T     | T     | T     | 175 |
| ODAM-CI      | C     | A     | G     | T     | A     | A     | C     | G     | A     | G     | G     | T     | T     | T     | T     | T     | 175 |
| ODAM-DR      | C     | A     | G     | T     | A     | A     | C     | G     | A     | G     | G     | T     | T     | T     | T     | T     | 175 |
| ODAM-PN      | C     | A     | G     | T     | A     | A     | C     | G     | A     | G     | G     | T     | T     | T     | T     | T     | 175 |
| ODAM-C1'CC   | C     | A     | G     | T     | A     | A     | C     | G     | A     | G     | G     | T     | T     | T     | T     | T     | 175 |
| ODAM-C2'CC   | C     | A     | G     | T     | A     | A     | C     | G     | A     | G     | G     | T     | T     | T     | T     | T     | 175 |
| ODAM-C1'SA   | C     | T     | C     | A     | G     | C     | T     | A     | A     | G     | G     | T     | T     | T     | T     | T     | 118 |
| ODAM-C2'SA   | C     | A     | G     | T     | A     | A     | C     | G     | A     | G     | G     | T     | T     | T     | T     | T     | 175 |
| ODAM'SR      | C     | A     | G     | T     | A     | A     | C     | G     | A     | G     | G     | T     | T     | T     | T     | T     | 175 |
| ODAM-C1'SG   | C     | A     | G     | T     | A     | A     | C     | G     | A     | G     | G     | T     | T     | T     | T     | T     | 175 |
| ODAM-C2'SG   | C     | A     | G     | T     | A     | A     | C     | G     | A     | G     | G     | T     | T     | T     | T     | T     | 175 |

|              |       |       |       |       |       |       |       |       |       |       |       |       |       |       |       |       |     |
|--------------|-------|-------|-------|-------|-------|-------|-------|-------|-------|-------|-------|-------|-------|-------|-------|-------|-----|
|              | 165   | 170   | 175   | 180   | 185   | 190   | 195   | 200   | 205   | 210   | 215   | 220   | 225   | 230   | 235   | 240   |     |
| conservation | ***** | ***** | ***** | ***** | ***** | ***** | ***** | ***** | ***** | ***** | ***** | ***** | ***** | ***** | ***** | ***** |     |
| ODAM'IP      | C     | T     | C     | C     | G     | T     | T     | C     | C     | A     | G     | T     | T     | C     | C     | A     | 240 |
| ODAM'LV      | C     | C     | C     | C     | T     | A     | C     | C     | T     | A     | C     | C     | T     | A     | C     | C     | 201 |
| ODAM'PP      | C     | C     | C     | C     | T     | A     | C     | C     | T     | A     | C     | C     | T     | A     | C     | C     | 237 |
| ODAM-CI      | C     | T     | C     | C     | T     | A     | C     | C     | T     | A     | C     | C     | T     | A     | C     | C     | 240 |
| ODAM-DR      | C     | T     | C     | C     | T     | A     | C     | C     | T     | A     | C     | C     | T     | A     | C     | C     | 240 |
| ODAM-PN      | C     | A     | C     | A     | T     | T     | C     | C     | A     | T     | T     | C     | C     | A     | T     | T     | 255 |
| ODAM-C1'CC   | C     | T     | C     | C     | T     | A     | C     | C     | T     | A     | C     | C     | T     | A     | C     | C     | 240 |
| ODAM-C2'CC   | C     | T     | C     | C     | T     | A     | C     | C     | T     | A     | C     | C     | T     | A     | C     | C     | 240 |
| ODAM-C1'SA   | C     | T     | C     | C     | T     | A     | C     | C     | T     | A     | C     | C     | T     | A     | C     | C     | 183 |
| ODAM-C2'SA   | C     | T     | C     | C     | T     | A     | C     | C     | T     | A     | C     | C     | T     | A     | C     | C     | 240 |
| ODAM'SR      | C     | T     | C     | C     | T     | A     | C     | C     | T     | A     | C     | C     | T     | A     | C     | C     | 240 |
| ODAM-C1'SG   | C     | T     | C     | C     | T     | A     | C     | C     | T     | A     | C     | C     | T     | A     | C     | C     | 240 |
| ODAM-C2'SG   | C     | T     | C     | C     | T     | A     | C     | C     | T     | A     | C     | C     | T     | A     | C     | C     | 240 |

|              |       |       |       |       |       |       |       |       |       |       |       |       |       |       |       |     |
|--------------|-------|-------|-------|-------|-------|-------|-------|-------|-------|-------|-------|-------|-------|-------|-------|-----|
|              | 245   | 250   | 255   | 260   | 265   | 270   | 275   | 280   | 285   | 290   | 295   | 300   | 305   | 310   | 315   |     |
| conservation | ***** | ***** | ***** | ***** | ***** | ***** | ***** | ***** | ***** | ***** | ***** | ***** | ***** | ***** | ***** |     |
| ODAM'IP      | T     | T     | C     | T     | G     | A     | C     | C     | C     | A     | C     | A     | A     | C     | A     | 317 |
| ODAM'LV      | T     | T     | C     | T     | T     | T     | T     | T     | T     | T     | T     | T     | T     | T     | T     | 272 |
| ODAM'PP      | T     | T     | C     | T     | T     | T     | T     | T     | T     | T     | T     | T     | T     | T     | T     | 317 |
| ODAM-CI      | T     | T     | C     | T     | T     | T     | T     | T     | T     | T     | T     | T     | T     | T     | T     | 320 |
| ODAM-DR      | T     | T     | C     | T     | T     | T     | T     | T     | T     | T     | T     | T     | T     | T     | T     | 311 |
| ODAM-PN      | T     | T     | C     | T     | T     | T     | T     | T     | T     | T     | T     | T     | T     | T     | T     | 332 |
| ODAM-C1'CC   | T     | T     | C     | T     | T     | T     | T     | T     | T     | T     | T     | T     | T     | T     | T     | 320 |
| ODAM-C2'CC   | T     | T     | C     | T     | T     | T     | T     | T     | T     | T     | T     | T     | T     | T     | T     | 320 |
| ODAM-C1'SA   | T     | T     | C     | T     | T     | T     | T     | T     | T     | T     | T     | T     | T     | T     | T     | 263 |
| ODAM-C2'SA   | T     | T     | C     | T     | T     | T     | T     | T     | T     | T     | T     | T     | T     | T     | T     | 320 |
| ODAM'SR      | T     | T     | C     | T     | T     | T     | T     | T     | T     | T     | T     | T     | T     | T     | T     | 320 |
| ODAM-C1'SG   | T     | T     | C     | T     | T     | T     | T     | T     | T     | T     | T     | T     | T     | T     | T     | 320 |
| ODAM-C2'SG   | T     | T     | C     | T     | T     | T     | T     | T     | T     | T     | T     | T     | T     | T     | T     | 320 |

|              |       |       |       |       |       |       |       |       |       |       |       |       |       |       |       |       |     |
|--------------|-------|-------|-------|-------|-------|-------|-------|-------|-------|-------|-------|-------|-------|-------|-------|-------|-----|
|              | 320   | 325   | 330   | 335   | 340   | 345   | 350   | 355   | 360   | 365   | 370   | 375   | 380   | 385   | 390   | 395   |     |
| conservation | ***** | ***** | ***** | ***** | ***** | ***** | ***** | ***** | ***** | ***** | ***** | ***** | ***** | ***** | ***** | ***** |     |
| ODAM'IP      | C     | C     | C     | C     | A     | C     | A     | A     | C     | C     | T     | C     | C     | C     | C     | A     | 397 |
| ODAM'LV      | C     | C     | C     | C     | A     | A     | C     | C     | G     | G     | T     | T     | C     | C     | T     | C     | 349 |
| ODAM'PP      | T     | C     | C     | C     | A     | C     | A     | A     | T     | T     | C     | C     | T     | C     | T     | C     | 394 |
| ODAM-CI      | T     | C     | C     | C     | A     | A     | C     | C     | G     | G     | T     | T     | C     | C     | T     | C     | 397 |
| ODAM-DR      | T     | C     | C     | C     | A     | C     | A     | A     | T     | T     | C     | C     | T     | C     | T     | C     | 387 |
| ODAM-PN      | C     | C     | C     | C     | A     | C     | A     | A     | T     | T     | C     | C     | T     | C     | T     | C     | 409 |
| ODAM-C1'CC   | T     | C     | C     | C     | A     | C     | A     | A     | T     | T     | C     | C     | T     | C     | T     | C     | 397 |
| ODAM-C2'CC   | T     | C     | C     | C     | A     | C     | A     | A     | T     | T     | C     | C     | T     | C     | T     | C     | 397 |
| ODAM-C1'SA   | T     | C     | C     | C     | A     | C     | A     | A     | T     | T     | C     | C     | T     | C     | T     | C     | 340 |
| ODAM-C2'SA   | T     | C     | C     | C     | A     | C     | A     | A     | T     | T     | C     | C     | T     | C     | T     | C     | 397 |
| ODAM'SR      | T     | C     | C     | C     | A     | C     | A     | A     | T     | T     | C     | C     | T     | C     | T     | C     | 397 |
| ODAM-C1'SG   | T     | C     | C     | C     | A     | C     | A     | A     | T     | T     | C     | C     | T     | C     | T     | C     | 397 |
| ODAM-C2'SG   | T     | C     | C     | C     | A     | C     | A     | A     | T     | T     | C     | C     | T     | C     | T     | C     | 397 |

|              |       |       |       |       |       |       |       |       |       |       |       |       |       |       |       |     |
|--------------|-------|-------|-------|-------|-------|-------|-------|-------|-------|-------|-------|-------|-------|-------|-------|-----|
|              | 400   | 405   | 410   | 415   | 420   | 425   | 430   | 435   | 440   | 445   | 450   | 455   | 460   | 465   | 470   |     |
| conservation | ***** | ***** | ***** | ***** | ***** | ***** | ***** | ***** | ***** | ***** | ***** | ***** | ***** | ***** | ***** |     |
| ODAM'IP      | A     | C     | A     | C     | G     | T     | G     | C     | C     | A     | T     | A     | T     | T     | C     | 471 |
| ODAM'LV      | A     | C     | A     | C     | T     | C     | T     | G     | A     | A     | G     | G     | T     | G     | A     | 429 |
| ODAM'PP      | A     | C     | A     | C     | C     | T     | G     | T     | A     | A     | G     | G     | T     | G     | A     | 474 |
| ODAM-CI      | A     | C     | A     | C     | T     | C     | T     | G     | A     | A     | G     | G     | T     | G     | A     | 474 |
| ODAM-DR      | ..    | A     | C     | T     | C     | T     | G     | T     | A     | A     | G     | G     | T     | G     | A     | 459 |
| ODAM-PN      | A     | C     | ..    | C     | C     | A     | A     | T     | A     | G     | T     | T     | C     | C     | A     | 486 |
| ODAM-C1'CC   | A     | C     | A     | C     | T     | C     | T     | G     | A     | A     | G     | G     | T     | G     | A     | 477 |
| ODAM-C2'CC   | A     | C     | A     | C     | T     | C     | T     | G     | A     | A     | G     | G     | T     | G     | A     | 477 |
| ODAM-C1'SA   | A     | C     | A     | C     | T     | C     | T     | G     | A     | A     | G     | G     | T     | G     | A     | 420 |
| ODAM-C2'SA   | A     | C     | A     | C     | T     | C     | T     | G     | A     | A     | G     | G     | T     | G     | A     | 477 |
| ODAM'SR      | A     | C     | A     | C     | T     | C     | T     | G     | A     | A     | G     | G     | T     | G     | A     | 477 |
| ODAM-C1'SG   | A     | C     | A     | C     | T     | C     | T     | G     | A     | A     | G     | G     | T     | G     | A     | 477 |
| ODAM-C2'SG   | A     | C     | A     | C     | T     | C     | T     | G     | A     | A     | G     | G     | T     | G     | A     | 477 |

|              |           |        |                                                        |                          |                   |                |                |     |     |     |     |
|--------------|-----------|--------|--------------------------------------------------------|--------------------------|-------------------|----------------|----------------|-----|-----|-----|-----|
|              | 475       | 480    | 485                                                    | 490                      | 495               |                | 500            | 505 | 510 | 515 |     |
| conservation | *****     | ***    | **!                                                    | *****                    | ***               | * ** *         | *              | *   |     | *** |     |
| ODAM'IP      | ACTAA     | ...    | GTCCT                                                  | CAGCCTG                  | TGCAGAAT          | .....          | AACGGGAAGGTGGT | GGA |     |     | 515 |
| ODAM'LV      | ATGCAA    | ...    | CCAGTGCAACCAATACAGGGTTAGGGTAGG                         | ATTAGGAAC                | .....             | AGGGTGAAGGCAGT | AGA            |     |     |     | 491 |
| ODAM'PP      | ATGCAA    | ...    | CCAGTGCAACCAATTCGACCAATACAGAAC                         | .....                    | AGGGTGAAGGCAGT    | AGA            |                |     |     |     | 527 |
| ODAM-CI      | GTGCAA    | ...    | CCAATGCAACCAAGTGCAACCAATCCAGAAC                        | .....                    | AGGGTGAAGGCAGT    | AGA            |                |     |     |     | 536 |
| ODAM-DR      | ATGCAA    | ...    | CCAATGCAGCCAATGCAACCAATACAGCCAATACAACCAATCCAGAAC       | .....                    | AGAGGGAATTTGGC    | AGA            |                |     |     |     | 530 |
| ODAM-PN      | ACTCCAGCA | CCCCCA | CAGCCTGCGCAGCCAGTAAATATT                               | AAACGGTTCTCAAGAAACTCAATA | AAGGGAAACCTTCCTCC |                |                |     |     |     | 566 |
| ODAM-C1'CC   | GTGCAA    | ...    | CCAATCCAGAAATATTT                                      | CACATTTTT                | CAG               | .....          | AACAGGGGAAAGC  | AGA |     |     | 530 |
| ODAM-C2'CC   | GTGCAA    | ...    | CCATTGCAACCAATGCAGCCAGTGCAACCAATGCAACCA                | .....                    | AGCCAGGGAAAGTC    | AGA            |                |     |     |     | 539 |
| ODAM-C1'SA   | ATGCAAG   | ...    | CCAGTGCAACCAATCCAGCCTCTGCCACCAACAACAAT                 | .....                    |                   |                |                |     |     |     | 465 |
| ODAM-C2'SA   | GTGCAA    | ...    | CCAATGCAACCAATGCAACCAATGCAGCCA                         | .....                    | AACAGGGGAAAGTC    | AGA            |                |     |     |     | 530 |
| ODAM'SR      | GTGCAA    | ...    | CCAATGCAACCAATGCAGCCAGTGCAACCAATGCAACCAATGCAACCA       | .....                    | ATACA             |                |                |     |     |     | 536 |
| ODAM-C1'SG   | GTGCAA    | ...    | CCAATACAACCAATCCAG                                     | .....                    |                   |                |                |     |     |     | 501 |
| ODAM-C2'SG   | GTGCAA    | ...    | CCAATGCAGCCAGTGCAACCAATGCAACCAATGCAACCAATACAACCAATCCAG | AACAGGGGAAAGTC           | AGA               |                |                |     |     |     | 554 |

|              |          |                                 |                       |              |              |       |       |       |       |       |     |     |
|--------------|----------|---------------------------------|-----------------------|--------------|--------------|-------|-------|-------|-------|-------|-----|-----|
|              | 520      | 525                             | 530                   | 535          | 540          | 545   | 550   | 555   | 560   | 565   | 570 |     |
| conservation | ***      | *****                           | *****                 | *****        | *****        | ***** | ***** | ***** | ***** | ***** | *** |     |
| ODAM'IP      | GCCGTGGC | ACATGACTCCGC                    | CCCTGAAAACCGTG        | GGTGATCGT    | CCTGGGCGTGGT |       |       |       |       |       |     | 570 |
| ODAM'LV      | CCCCG    | ...ATGGTAACGTCTGCTCCTGATTACCGTG | GGTGATCGGCCCGGT       | CCTGGA       |              |       |       |       |       |       |     | 543 |
| ODAM'PP      | CCCCG    | ...ATGGTAACGTCTGCTCCTGATTACCGTG | GGTGATCGGCCCGGT       | CCTGGA       |              |       |       |       |       |       |     | 579 |
| ODAM-CI      | CCCCG    | ...AAGGTAACGTCTGCTCCTGATTACCGTG | GGTGATCGGCCCGGT       | CCTGGA       |              |       |       |       |       |       |     | 588 |
| ODAM-DR      | CCCCG    | ...AAAGCAACGTCTGTG              | CCTGAATACCGGGGTGATCGA | CCCGGT       | CCTGGA       |       |       |       |       |       |     | 582 |
| ODAM-PN      | TCCT     | .....                           | GGTGGCCAGCGT          | CCTCCACTTGGC |              |       |       |       |       |       |     | 594 |
| ODAM-C1'CC   | CCCCG    | ...AAGGTAACGTCTGCTCCTGATTACCGTG | GGTGATCGGCCCGGT       | TCCTGGA      |              |       |       |       |       |       |     | 582 |
| ODAM-C2'CC   | CCAG     | ...AAGGTAACGTCTGCTCCTGATTACCGTG | GGTGATCGGCCCTGGTCCGGA |              |              |       |       |       |       |       |     | 591 |
| ODAM-C1'SA   |          | .....                           |                       |              |              |       |       |       |       |       |     | 465 |
| ODAM-C2'SA   | CCCCG    | ...AAGGTAACGTCTGCTCCTGATTACCGTG | GGTGATCGGCCCGGTCCGGA  |              |              |       |       |       |       |       |     | 582 |
| ODAM'SR      | ACCAATCC | AGGTAACGTCTGCTCCTGATTACCGTG     | GGTGATCGGCCCGGTCCGGA  |              |              |       |       |       |       |       |     | 591 |
| ODAM-C1'SG   |          | .....                           |                       |              |              |       |       |       |       |       |     | 501 |
| ODAM-C2'SG   | CCCCG    | ...AAGGTAACGTCTGCTCCTGATTACCGTG | GGTGATCGGCCCGGTCCGGA  |              |              |       |       |       |       |       |     | 606 |

- ⬜ non conserved
- ⬜ ≥ 55% conserved
- ⬜ ≥ 85% conserved
