# Supplementary material for: A Genomic Survey of SCPP Family Genes in Fishes Provides Novel Insights into the Evolution of Fish Scales
Source: MDPI journal article supplement (doi:10.3390/ijms18112432), 2017-11-16
Supplement: s1 [file s1]

conservation

|                        |                                                                                     |    |
|------------------------|-------------------------------------------------------------------------------------|----|
| SCPP6 <sup>PP</sup>    | AGGCTTATAGTGTGCTCATATGTTCTAGCTAGGAACTTTGGAGTTCCTGCTCAACGACCAAGGCTCTGAGGTTACTG..     | 78 |
| SCPP6 <sup>LW</sup>    | AGGCTTATAGGCTTGGCTCACAATGTTTCTAGCTGGAACTTTGGAGTTCGGATATCTCTTTTCTCCATAT.....         | 72 |
| SCPP6 <sup>DR</sup>    | AGGCTTATAGTGATGATCGTGTGCTTTCTTGTCTGGAACTCTCGCTGTTCCGATCTCTCCCAAAATGCTGATTTAAAGGAATC | 83 |
| SCPP6 <sup>CI</sup>    | AGGCTTATAGGCTTGGCTCGTGTGTTTCTAGCTGGAACTCTGGAGTTCATCTCTCACTGTCTGGGCTCTGAAGTTACTG..   | 81 |
| SCPP6-C1 <sup>CC</sup> |                                                                                     | 0  |
| SCPP6-C2 <sup>CC</sup> | AGGCTTCTAACATTGCTCGCATGCTTTCTAGCTGGAACTCTCGAGTTCCGTCCTCGGCGTCTGATCTGAGGTATTG..      | 81 |
| SCPP6-C1 <sup>SG</sup> | ...CTTCAAGCGTTGCTCGCATGTTTCTAGCTGGAACTCACTGGAGTTCGATCTCTCCCAAAATGCTGATTTGATGGAATC   | 77 |
| SCPP6-C2 <sup>SG</sup> | .....CTAGCGTTTCTCGCATGCTTTTCTAGCTGGAACTCTGGAGTTCGATCTCTCTCCCAAAATGCTGATTTGATGGAT..  | 72 |
| SCPP6-C1 <sup>SR</sup> | AGGCTTCAAGCATTTGCTCGCATGTTTCTAGCTGGAACTCTGGAGTTCGGATCTCTCCCAAAATGCTGATTTGATGGAATC   | 83 |
| SCPP6-C2 <sup>SR</sup> | AAGACAGTAAATTTTATTTGCAATGTTTCTTGGTCTGTCTTTGGCATTGCAGGCTGAAGTTTACCAGCGTTCGGGTTTCGC.. | 81 |
| SCPP6-C1 <sup>SA</sup> | AGGCTTCAAGCATTTGCTCGCATGTTTCTAGCTGGAACTCTGGAGTTCGGATCTCTCTCCCAAAATGCTGATTTGATGGAATC | 83 |
| SCPP6-C2 <sup>SA</sup> | .....CTAGCATTGCTCGCATGCTTTCTAGCTGGAACTCTGGAGTTCGTCCTCACTGTCTTGTATCTGAGGTATTG..      | 72 |

|                        |       |        |         |        |       |        |         |        |        |       |        |        |         |      |       |       |       |       |     |
|------------------------|-------|--------|---------|--------|-------|--------|---------|--------|--------|-------|--------|--------|---------|------|-------|-------|-------|-------|-----|
|                        | 80    | 85     | 90      | 95     | 100   | 105    | 110     | 115    | 120    | 125   | 130    | 135    | 140     | 145  | 150   | 155   |       |       |     |
| conservation           | **    | *      | **      | **     | ***** | *****  | *****   | *****  | *****  | ***** | *****  | *****  | ***!    | *!*  | ***!  | !!    | *!*   |       |     |
| SCPP6 <sup>PP</sup>    | .GTC  | CAAG   | CCCATC  | ATG    | TGCCA | CAA    | CAGTTT  | CAGCCT | AAATCT | TCCC  | AAAG   | TTCCCT | CTG     | GTG  | AGCA  | ACAG  | CTGG  | CCA   | 157 |
| SCPP6 <sup>LW</sup>    | .ATAA | ATTCTA | ACTCT   | CATT   | TATAG | GAGACT | GTCTG   | GGTGT  | AGGGT  | TAGAG | TGCC   | CTCT   | GGT     | CCTC | AGCA  | ACAG  | CTGG  | CGG   | 151 |
| SCPP6 <sup>DR</sup>    | GCT   | GTC    | AGTGGG  | AGAT   | TG..  | CAA    | CAGTTT  | CAGCCT | GGATCT | CCTAG | AATG   | CTCT   | CTGG    | ACTT | CATCA | ACAG  | TGCC  | .     | 159 |
| SCPP6 <sup>CI</sup>    | .GT   | ACAAG  | CAAAAC  | ATG    | TGCCA | CAGC   | AGTT    | CCAGC  | CTAA   | ATCT  | TCCC   | AGAG   | TG..... | CCTC | AGAC  | CACAC | CTGG  | CCA   | 151 |
| SCPP6-C1 <sup>CC</sup> |       |        |         |        |       |        |         |        |        |       |        |        |         |      |       |       |       |       | 0   |
| SCPP6-C2 <sup>CC</sup> | .GT   | ACAAG  | CCCACC  | ATG    | TGCCA | ATT    | GCAGTTT | CTGCCT | GAATCT | TCCC  | AGAA   | TGCTCT | CTGG    | TCTC | AGCC  | ACAT  | CTGG  | CCA   | 160 |
| SCPP6-C1 <sup>SG</sup> | AGT   | CCC    | AGTGGG  | AGAT   | TGCCA | AGC    | GAGGA   | ACCC   | AGTG   | ATAC  | AGTC   | CTCA   | CTGC    | CTGG | ATCT  | GAGCC | ACAT  | CTGCC | 157 |
| SCPP6-C2 <sup>SG</sup> | .TT   | GCTCAA | ATTTG   | AT     | AAAA  | CCA    | GCAGTTT | CAGCCT | GAATCT | TCCC  | AGAA   | TGCTCT | CTGG    | TCTC | AGCC  | ACAT  | CTGCC |       | 151 |
| SCPP6-C1 <sup>SR</sup> | AGT   | CCC    | AGTGGG  | AGAT   | TGCCA | AGCA   | GAGGA   | ACCC   | AGTG   | ATAC  | AGTC   | CTCA   | CTGC    | CTGG | ATCT  | GAGCC | ACAT  | ATGCC | 163 |
| SCPP6-C2 <sup>SR</sup> | .TC   | ATTCC  | AGGCT   | CGGATT | CTGAT | GAGTTT | CAGCCT  | GAATCT | TCCC   | AGAA  | TGCTCT | CTGG   | TCTC    | AGCC | ACAT  | CTGCC |       | 160   |     |
| SCPP6-C1 <sup>SA</sup> | AGT   | CCC    | AGTGGG  | AGAT   | TGCCA | AGC    | GAGGA   | ACCC   | AGTG   | ATAC  | AGTC   | CTCA   | CTGC    | CTGG | ATCT  | GAGCC | ACAG  | CTGCC | 163 |
| SCPP6-C2 <sup>SA</sup> | .GT   | ACAAG  | CCCCAAC | ATG    | TGCCA | CAGC   | AGTTT   | CAGCCT | GAATCT | TCCC  | AGAA   | TGCTCT | CTGG    | TCTC | AGCC  | ACAT  | CTGCC |       | 151 |

|                        |                                                                                   |       |       |       |       |       |       |       |       |       |       |       |       |       |       |       |  |
|------------------------|-----------------------------------------------------------------------------------|-------|-------|-------|-------|-------|-------|-------|-------|-------|-------|-------|-------|-------|-------|-------|--|
|                        | 160                                                                               | 165   | 170   | 175   | 180   | 185   | 190   | 195   | 200   | 205   | 210   | 215   | 220   | 225   | 230   | 235   |  |
| conservation           | *****                                                                             | ***** | ***** | ***** | ***** | ***** | ***** | ***** | ***** | ***** | ***** | ***** | ***** | ***** | ***** | ***** |  |
| SCPP6 <sup>PP</sup>    | CTCTGACCAATCCATGGGCCTACCAACCCAACCCCAAGCAGGTCTCGGTCAACTTCCTGCACCTTTTCAATACTTTCC    | 237   |       |       |       |       |       |       |       |       |       |       |       |       |       |       |  |
| SCPP6 <sup>LW</sup>    | CTCTGACCAATCCATGGGCCTCTCACCCAACCCCAATACAGGTTTCGGTCAACTTCCAGCACACATTCAATACTTTCCC   | 231   |       |       |       |       |       |       |       |       |       |       |       |       |       |       |  |
| SCPP6 <sup>DR</sup>    | .....AATCCATGGGCCTCTCAAACCCAACCCCAAGTACTGCTGTGAGACAGCATCCAGCACAGTTTCAGTACCTTCCT   | 231   |       |       |       |       |       |       |       |       |       |       |       |       |       |       |  |
| SCPP6 <sup>CI</sup>    | CTCTGACCAATCCATGGGTC...CAACCCAACCCCAATACAGGTCTCAGTCAA.....CACTTTCATATACATTCC      | 219   |       |       |       |       |       |       |       |       |       |       |       |       |       |       |  |
| SCPP6-C1 <sup>CC</sup> | .....                                                                             | 0     |       |       |       |       |       |       |       |       |       |       |       |       |       |       |  |
| SCPP6-C2 <sup>CC</sup> | CTCTGACCAATCCAAAGGGCCTCTCAAACCCAACCCCAATATTTGGTCTCAGTCAACTTCCTGCACACTTTTCACTTACCC | 240   |       |       |       |       |       |       |       |       |       |       |       |       |       |       |  |
| SCPP6-C1 <sup>SG</sup> | CTCTGACCAATCCATGGGCATCTCAAACCCAACCCCAATACTGGTCTCAGTCAGCTTCCAGAACACTTCCAGTACTTACCC | 237   |       |       |       |       |       |       |       |       |       |       |       |       |       |       |  |
| SCPP6-C2 <sup>SG</sup> | CA.....TCTGCCCATTTCTGACCAATCTATGGCCTCTCAACTTCTTGCACACTTTTCACTGCTTACCC             | 213   |       |       |       |       |       |       |       |       |       |       |       |       |       |       |  |
| SCPP6-C1 <sup>SR</sup> | CTCTGACCAATCCATGGGCATCTCAAACCCAACCCCAATACTGGTCTCAGTCAGCTTCCAGTACACTTCCAGTACTTACCC | 243   |       |       |       |       |       |       |       |       |       |       |       |       |       |       |  |
| SCPP6-C2 <sup>SR</sup> | CCCTGACCAATCTATGGGCCTCTCAAACCCAACCCCAATATTTGGTCTCAGTCAACTTCCAGCACACTTTTCACTTACCC  | 240   |       |       |       |       |       |       |       |       |       |       |       |       |       |       |  |
| SCPP6-C1 <sup>SA</sup> | CTCTGACCAATCCATGGACATCTCAAACCCAACCCCAATACTGGTCTCAGTCAGCTTCCAGTACACTTCCAGTACTTACCC | 243   |       |       |       |       |       |       |       |       |       |       |       |       |       |       |  |
| SCPP6-C2 <sup>SA</sup> | CTCTGACCAATCTATGGGCCTCTCAAACCAACCCGAATATTTGGTCTCAGTCAACTTCCTGCACATTTTCACTGCTTACCC | 231   |       |       |       |       |       |       |       |       |       |       |       |       |       |       |  |

|              |     |     |     |     |     |     |     |     |     |     |     |     |     |     |     |    |   |   |   |   |   |   |   |   |   |   |   |   |   |   |   |   |   |   |   |   |   |   |   |   |   |   |   |   |   |   |   |   |   |   |   |   |   |   |   |   |   |   |   |   |   |   |   |   |   |   |   |   |   |   |   |   |   |   |   |   |   |   |   |   |   |   |   |   |   |   |   |   |   |   |   |   |   |   |   |   |   |   |   |   |   |   |   |   |   |   |   |   |   |   |   |   |   |   |   |   |   |   |   |   |   |   |   |   |   |   |   |   |   |   |   |   |   |   |   |   |   |   |   |   |   |   |   |   |   |   |   |   |   |   |   |   |   |   |   |   |   |   |   |   |   |   |   |   |   |   |   |   |   |   |   |   |   |   |   |   |   |   |   |   |   |   |   |   |   |   |   |   |   |   |   |   |   |   |   |   |   |   |   |   |   |   |   |   |   |   |   |   |   |   |   |   |   |   |   |   |   |   |   |   |   |   |   |   |   |   |   |   |   |   |   |   |   |   |   |   |   |   |   |   |   |   |   |   |   |   |   |   |   |   |   |   |   |   |   |   |   |   |   |   |   |   |   |   |   |   |   |   |   |   |   |   |   |   |   |   |   |   |   |   |   |   |   |   |   |   |   |   |   |   |   |   |   |   |   |   |   |   |   |   |   |   |   |   |   |   |   |   |   |   |   |   |   |   |   |   |   |   |   |   |   |   |   |   |   |   |   |   |   |   |   |   |   |   |   |   |   |   |   |   |   |   |   |   |   |   |   |   |   |   |   |   |   |   |   |   |   |   |   |   |   |   |   |   |   |   |   |   |   |   |   |   |   |   |   |   |   |   |   |   |   |   |   |   |   |   |   |   |   |   |   |   |   |   |   |   |   |   |   |   |   |   |   |   |   |   |   |   |   |   |   |   |   |   |   |   |   |   |   |   |   |   |   |   |   |   |   |   |   |   |   |   |   |   |   |   |   |   |   |   |   |   |   |   |   |   |   |   |   |   |   |   |   |   |   |   |   |   |   |   |   |   |   |   |   |   |   |   |   |   |   |   |   |   |   |   |   |   |   |   |   |   |   |   |   |   |   |   |   |   |   |   |   |   |   |   |   |   |   |   |   |   |   |   |   |   |   |   |   |   |   |   |   |   |   |   |   |   |   |   |   |   |   |   |   |   |   |   |   |   |   |   |   |   |   |   |   |   |   |   |   |   |   |   |   |   |   |   |   |   |   |   |   |   |   |   |   |   |   |   |   |   |   |   |   |   |   |   |   |   |   |   |   |   |   |   |   |   |   |   |   |   |   |   |   |   |   |   |   |   |   |   |   |   |   |   |   |   |   |   |   |   |   |   |   |   |   |   |   |   |   |   |   |   |   |   |   |   |   |   |   |   |   |   |   |   |   |   |   |   |   |   |   |   |   |   |   |   |   |   |   |   |   |   |   |   |   |   |   |   |   |   |   |   |   |   |   |   |   |   |   |   |   |   |   |   |   |   |   |   |   |   |   |   |   |   |   |   |   |   |   |   |   |   |   |   |   |   |   |   |   |   |   |   |   |   |   |   |   |   |   |   |   |   |   |   |   |   |   |   |   |   |   |   |   |   |   |   |   |   |   |   |   |   |   |   |   |   |   |   |   |   |   |   |   |   |   |   |   |   |   |   |   |   |   |   |   |   |   |   |   |   |   |   |   |   |   |   |   |   |   |   |   |   |   |   |   |   |   |   |   |   |   |   |   |   |   |   |   |   |   |   |   |   |   |   |   |   |   |   |   |   |   |   |   |   |   |   |   |   |   |   |   |   |   |   |   |   |   |   |   |   |   |   |   |   |   |   |   |   |   |   |   |   |   |   |   |   |   |   |   |   |   |   |   |   |   |   |   |   |   |   |   |   |   |   |   |   |   |   |   |   |   |   |   |   |   |   |   |   |   |   |   |   |   |   |   |   |   |   |   |   |   |   |   |   |   |   |   |   |   |   |   |   |   |   |   |   |   |   |   |   |   |   |   |   |   |   |   |   |   |   |   |   |   |   |   |   |   |   |   |   |   |   |   |   |   |   |   |   |   |   |   |   |   |   |   |   |   |   |   |   |   |   |   |   |   |   |   |   |   |   |   |   |   |   |   |   |   |   |   |   |   |   |   |   |   |   |   |   |   |   |   |   |   |   |   |   |   |   |   |   |   |   |   |   |   |   |   |   |   |   |   |   |   |   |   |   |   |   |   |   |   |   |   |   |   |   |   |   |   |   |   |   |   |   |   |   |   |   |   |   |   |   |   |   |   |   |   |   |   |   |   |   |   |   |   |   |   |   |   |   |   |   |   |   |   |   |   |   |   |   |   |   |   |   |   |   |   |   |   |   |   |   |   |   |   |   |   |   |   |   |   |   |   |   |   |   |   |   |   |   |   |   |   |   |   |   |   |   |   |   |   |   |   |   |   |   |   |   |   |   |   |   |   |   |   |   |   |   |   |   |   |   |   |   |   |   |   |   |   |   |   |   |   |   |   |   |   |   |   |   |   |   |   |   |   |   |   |   |   |   |   |   |   |   |   |   |   |   |   |   |   |   |   |   |   |   |   |   |   |   |   |   |   |   |   |   |   |   |   |   |   |   |   |   |   |   |   |   |   |   |   |   |   |   |   |   |   |   |   |   |   |   |   |   |   |   |   |   |   |   |   |   |   |   |   |   |   |   |   |   |   |   |   |   |   |   |   |   |   |   |   |   |   |   |   |   |   |   |   |   |   |   |   |   |   |   |   |   |   |   |   |   |   |   |   |   |   |   |   |
|--------------|-----|-----|-----|-----|-----|-----|-----|-----|-----|-----|-----|-----|-----|-----|-----|----|---|---|---|---|---|---|---|---|---|---|---|---|---|---|---|---|---|---|---|---|---|---|---|---|---|---|---|---|---|---|---|---|---|---|---|---|---|---|---|---|---|---|---|---|---|---|---|---|---|---|---|---|---|---|---|---|---|---|---|---|---|---|---|---|---|---|---|---|---|---|---|---|---|---|---|---|---|---|---|---|---|---|---|---|---|---|---|---|---|---|---|---|---|---|---|---|---|---|---|---|---|---|---|---|---|---|---|---|---|---|---|---|---|---|---|---|---|---|---|---|---|---|---|---|---|---|---|---|---|---|---|---|---|---|---|---|---|---|---|---|---|---|---|---|---|---|---|---|---|---|---|---|---|---|---|---|---|---|---|---|---|---|---|---|---|---|---|---|---|---|---|---|---|---|---|---|---|---|---|---|---|---|---|---|---|---|---|---|---|---|---|---|---|---|---|---|---|---|---|---|---|---|---|---|---|---|---|---|---|---|---|---|---|---|---|---|---|---|---|---|---|---|---|---|---|---|---|---|---|---|---|---|---|---|---|---|---|---|---|---|---|---|---|---|---|---|---|---|---|---|---|---|---|---|---|---|---|---|---|---|---|---|---|---|---|---|---|---|---|---|---|---|---|---|---|---|---|---|---|---|---|---|---|---|---|---|---|---|---|---|---|---|---|---|---|---|---|---|---|---|---|---|---|---|---|---|---|---|---|---|---|---|---|---|---|---|---|---|---|---|---|---|---|---|---|---|---|---|---|---|---|---|---|---|---|---|---|---|---|---|---|---|---|---|---|---|---|---|---|---|---|---|---|---|---|---|---|---|---|---|---|---|---|---|---|---|---|---|---|---|---|---|---|---|---|---|---|---|---|---|---|---|---|---|---|---|---|---|---|---|---|---|---|---|---|---|---|---|---|---|---|---|---|---|---|---|---|---|---|---|---|---|---|---|---|---|---|---|---|---|---|---|---|---|---|---|---|---|---|---|---|---|---|---|---|---|---|---|---|---|---|---|---|---|---|---|---|---|---|---|---|---|---|---|---|---|---|---|---|---|---|---|---|---|---|---|---|---|---|---|---|---|---|---|---|---|---|---|---|---|---|---|---|---|---|---|---|---|---|---|---|---|---|---|---|---|---|---|---|---|---|---|---|---|---|---|---|---|---|---|---|---|---|---|---|---|---|---|---|---|---|---|---|---|---|---|---|---|---|---|---|---|---|---|---|---|---|---|---|---|---|---|---|---|---|---|---|---|---|---|---|---|---|---|---|---|---|---|---|---|---|---|---|---|---|---|---|---|---|---|---|---|---|---|---|---|---|---|---|---|---|---|---|---|---|---|---|---|---|---|---|---|---|---|---|---|---|---|---|---|---|---|---|---|---|---|---|---|---|---|---|---|---|---|---|---|---|---|---|---|---|---|---|---|---|---|---|---|---|---|---|---|---|---|---|---|---|---|---|---|---|---|---|---|---|---|---|---|---|---|---|---|---|---|---|---|---|---|---|---|---|---|---|---|---|---|---|---|---|---|---|---|---|---|---|---|---|---|---|---|---|---|---|---|---|---|---|---|---|---|---|---|---|---|---|---|---|---|---|---|---|---|---|---|---|---|---|---|---|---|---|---|---|---|---|---|---|---|---|---|---|---|---|---|---|---|---|---|---|---|---|---|---|---|---|---|---|---|---|---|---|---|---|---|---|---|---|---|---|---|---|---|---|---|---|---|---|---|---|---|---|---|---|---|---|---|---|---|---|---|---|---|---|---|---|---|---|---|---|---|---|---|---|---|---|---|---|---|---|---|---|---|---|---|---|---|---|---|---|---|---|---|---|---|---|---|---|---|---|---|---|---|---|---|---|---|---|---|---|---|---|---|---|---|---|---|---|---|---|---|---|---|---|---|---|---|---|---|---|---|---|---|---|---|---|---|---|---|---|---|---|---|---|---|---|---|---|---|---|---|---|---|---|---|---|---|---|---|---|---|---|---|---|---|---|---|---|---|---|---|---|---|---|---|---|---|---|---|---|---|---|---|---|---|---|---|---|---|---|---|---|---|---|---|---|---|---|---|---|---|---|---|---|---|---|---|---|---|---|---|---|---|---|---|---|---|---|---|---|---|---|---|---|---|---|---|---|---|---|---|---|---|---|---|---|---|---|---|---|---|---|---|---|---|---|---|---|---|---|---|---|---|---|---|---|---|---|---|---|---|---|---|---|---|---|---|---|---|---|---|---|---|---|---|---|---|---|---|---|---|---|---|---|---|---|---|---|---|---|---|---|---|---|---|---|---|---|---|---|---|---|---|---|---|---|---|---|---|---|---|---|---|---|---|---|---|---|---|---|---|---|---|---|---|---|---|---|---|---|---|---|---|---|---|---|---|---|---|---|---|---|---|---|---|---|---|---|---|---|---|---|---|---|---|---|---|---|---|---|---|---|---|---|---|---|---|---|---|---|---|---|---|---|---|---|---|---|---|---|---|---|---|---|---|---|---|---|---|---|---|---|---|---|---|---|---|---|---|---|---|---|---|---|---|---|---|---|---|---|---|---|---|---|---|---|---|---|---|---|---|---|---|---|---|---|---|---|---|---|---|---|---|---|---|---|---|---|---|---|---|---|---|---|---|---|---|---|---|---|---|---|---|---|---|---|---|---|---|---|---|---|---|---|---|---|---|---|---|---|---|---|---|---|---|---|---|---|---|---|---|---|---|---|---|---|---|---|---|---|---|---|---|---|---|---|---|---|---|---|---|---|---|---|---|---|---|---|---|---|---|---|---|---|---|---|
|              | 240 | 245 | 250 | 255 | 260 | 265 | 270 | 275 | 280 | 285 | 290 | 295 | 300 | 305 | 310 |    |   |   |   |   |   |   |   |   |   |   |   |   |   |   |   |   |   |   |   |   |   |   |   |   |   |   |   |   |   |   |   |   |   |   |   |   |   |   |   |   |   |   |   |   |   |   |   |   |   |   |   |   |   |   |   |   |   |   |   |   |   |   |   |   |   |   |   |   |   |   |   |   |   |   |   |   |   |   |   |   |   |   |   |   |   |   |   |   |   |   |   |   |   |   |   |   |   |   |   |   |   |   |   |   |   |   |   |   |   |   |   |   |   |   |   |   |   |   |   |   |   |   |   |   |   |   |   |   |   |   |   |   |   |   |   |   |   |   |   |   |   |   |   |   |   |   |   |   |   |   |   |   |   |   |   |   |   |   |   |   |   |   |   |   |   |   |   |   |   |   |   |   |   |   |   |   |   |   |   |   |   |   |   |   |   |   |   |   |   |   |   |   |   |   |   |   |   |   |   |   |   |   |   |   |   |   |   |   |   |   |   |   |   |   |   |   |   |   |   |   |   |   |   |   |   |   |   |   |   |   |   |   |   |   |   |   |   |   |   |   |   |   |   |   |   |   |   |   |   |   |   |   |   |   |   |   |   |   |   |   |   |   |   |   |   |   |   |   |   |   |   |   |   |   |   |   |   |   |   |   |   |   |   |   |   |   |   |   |   |   |   |   |   |   |   |   |   |   |   |   |   |   |   |   |   |   |   |   |   |   |   |   |   |   |   |   |   |   |   |   |   |   |   |   |   |   |   |   |   |   |   |   |   |   |   |   |   |   |   |   |   |   |   |   |   |   |   |   |   |   |   |   |   |   |   |   |   |   |   |   |   |   |   |   |   |   |   |   |   |   |   |   |   |   |   |   |   |   |   |   |   |   |   |   |   |   |   |   |   |   |   |   |   |   |   |   |   |   |   |   |   |   |   |   |   |   |   |   |   |   |   |   |   |   |   |   |   |   |   |   |   |   |   |   |   |   |   |   |   |   |   |   |   |   |   |   |   |   |   |   |   |   |   |   |   |   |   |   |   |   |   |   |   |   |   |   |   |   |   |   |   |   |   |   |   |   |   |   |   |   |   |   |   |   |   |   |   |   |   |   |   |   |   |   |   |   |   |   |   |   |   |   |   |   |   |   |   |   |   |   |   |   |   |   |   |   |   |   |   |   |   |   |   |   |   |   |   |   |   |   |   |   |   |   |   |   |   |   |   |   |   |   |   |   |   |   |   |   |   |   |   |   |   |   |   |   |   |   |   |   |   |   |   |   |   |   |   |   |   |   |   |   |   |   |   |   |   |   |   |   |   |   |   |   |   |   |   |   |   |   |   |   |   |   |   |   |   |   |   |   |   |   |   |   |   |   |   |   |   |   |   |   |   |   |   |   |   |   |   |   |   |   |   |   |   |   |   |   |   |   |   |   |   |   |   |   |   |   |   |   |   |   |   |   |   |   |   |   |   |   |   |   |   |   |   |   |   |   |   |   |   |   |   |   |   |   |   |   |   |   |   |   |   |   |   |   |   |   |   |   |   |   |   |   |   |   |   |   |   |   |   |   |   |   |   |   |   |   |   |   |   |   |   |   |   |   |   |   |   |   |   |   |   |   |   |   |   |   |   |   |   |   |   |   |   |   |   |   |   |   |   |   |   |   |   |   |   |   |   |   |   |   |   |   |   |   |   |   |   |   |   |   |   |   |   |   |   |   |   |   |   |   |   |   |   |   |   |   |   |   |   |   |   |   |   |   |   |   |   |   |   |   |   |   |   |   |   |   |   |   |   |   |   |   |   |   |   |   |   |   |   |   |   |   |   |   |   |   |   |   |   |   |   |   |   |   |   |   |   |   |   |   |   |   |   |   |   |   |   |   |   |   |   |   |   |   |   |   |   |   |   |   |   |   |   |   |   |   |   |   |   |   |   |   |   |   |   |   |   |   |   |   |   |   |   |   |   |   |   |   |   |   |   |   |   |   |   |   |   |   |   |   |   |   |   |   |   |   |   |   |   |   |   |   |   |   |   |   |   |   |   |   |   |   |   |   |   |   |   |   |   |   |   |   |   |   |   |   |   |   |   |   |   |   |   |   |   |   |   |   |   |   |   |   |   |   |   |   |   |   |   |   |   |   |   |   |   |   |   |   |   |   |   |   |   |   |   |   |   |   |   |   |   |   |   |   |   |   |   |   |   |   |   |   |   |   |   |   |   |   |   |   |   |   |   |   |   |   |   |   |   |   |   |   |   |   |   |   |   |   |   |   |   |   |   |   |   |   |   |   |   |   |   |   |   |   |   |   |   |   |   |   |   |   |   |   |   |   |   |   |   |   |   |   |   |   |   |   |   |   |   |   |   |   |   |   |   |   |   |   |   |   |   |   |   |   |   |   |   |   |   |   |   |   |   |   |   |   |   |   |   |   |   |   |   |   |   |   |   |   |   |   |   |   |   |   |   |   |   |   |   |   |   |   |   |   |   |   |   |   |   |   |   |   |   |   |   |   |   |   |   |   |   |   |   |   |   |   |   |   |   |   |   |   |   |   |   |   |   |   |   |   |   |   |   |   |   |   |   |   |   |   |   |   |   |   |   |   |   |   |   |   |   |   |   |   |   |   |   |   |   |   |   |   |   |   |   |   |   |   |   |   |   |   |   |   |   |   |   |   |   |   |   |   |   |   |   |   |   |   |   |   |   |   |   |   |   |   |   |   |   |   |   |   |   |   |   |   |   |   |   |   |   |   |   |   |   |   |   |   |   |   |   |   |   |   |   |   |   |   |   |   |   |   |   |
| conservation | *   | !   | *   | !   | *   | *   | *   | *   | *   | *   | *   | *   | *   | *   | *   | ** |   |   |   |   |   |   |   |   |   |   |   |   |   |   |   |   |   |   |   |   |   |   |   |   |   |   |   |   |   |   |   |   |   |   |   |   |   |   |   |   |   |   |   |   |   |   |   |   |   |   |   |   |   |   |   |   |   |   |   |   |   |   |   |   |   |   |   |   |   |   |   |   |   |   |   |   |   |   |   |   |   |   |   |   |   |   |   |   |   |   |   |   |   |   |   |   |   |   |   |   |   |   |   |   |   |   |   |   |   |   |   |   |   |   |   |   |   |   |   |   |   |   |   |   |   |   |   |   |   |   |   |   |   |   |   |   |   |   |   |   |   |   |   |   |   |   |   |   |   |   |   |   |   |   |   |   |   |   |   |   |   |   |   |   |   |   |   |   |   |   |   |   |   |   |   |   |   |   |   |   |   |   |   |   |   |   |   |   |   |   |   |   |   |   |   |   |   |   |   |   |   |   |   |   |   |   |   |   |   |   |   |   |   |   |   |   |   |   |   |   |   |   |   |   |   |   |   |   |   |   |   |   |   |   |   |   |   |   |   |   |   |   |   |   |   |   |   |   |   |   |   |   |   |   |   |   |   |   |   |   |   |   |   |   |   |   |   |   |   |   |   |   |   |   |   |   |   |   |   |   |   |   |   |   |   |   |   |   |   |   |   |   |   |   |   |   |   |   |   |   |   |   |   |   |   |   |   |   |   |   |   |   |   |   |   |   |   |   |   |   |   |   |   |   |   |   |   |   |   |   |   |   |   |   |   |   |   |   |   |   |   |   |   |   |   |   |   |   |   |   |   |   |   |   |   |   |   |   |   |   |   |   |   |   |   |   |   |   |   |   |   |   |   |   |   |   |   |   |   |   |   |   |   |   |   |   |   |   |   |   |   |   |   |   |   |   |   |   |   |   |   |   |   |   |   |   |   |   |   |   |   |   |   |   |   |   |   |   |   |   |   |   |   |   |   |   |   |   |   |   |   |   |   |   |   |   |   |   |   |   |   |   |   |   |   |   |   |   |   |   |   |   |   |   |   |   |   |   |   |   |   |   |   |   |   |   |   |   |   |   |   |   |   |   |   |   |   |   |   |   |   |   |   |   |   |   |   |   |   |   |   |   |   |   |   |   |   |   |   |   |   |   |   |   |   |   |   |   |   |   |   |   |   |   |   |   |   |   |   |   |   |   |   |   |   |   |   |   |   |   |   |   |   |   |   |   |   |   |   |   |   |   |   |   |   |   |   |   |   |   |   |   |   |   |   |   |   |   |   |   |   |   |   |   |   |   |   |   |   |   |   |   |   |   |   |   |   |   |   |   |   |   |   |   |   |   |   |   |   |   |   |   |   |   |   |   |   |   |   |   |   |   |   |   |   |   |   |   |   |   |   |   |   |   |   |   |   |   |   |   |   |   |   |   |   |   |   |   |   |   |   |   |   |   |   |   |   |   |   |   |   |   |   |   |   |   |   |   |   |   |   |   |   |   |   |   |   |   |   |   |   |   |   |   |   |   |   |   |   |   |   |   |   |   |   |   |   |   |   |   |   |   |   |   |   |   |   |   |   |   |   |   |   |   |   |   |   |   |   |   |   |   |   |   |   |   |   |   |   |   |   |   |   |   |   |   |   |   |   |   |   |   |   |   |   |   |   |   |   |   |   |   |   |   |   |   |   |   |   |   |   |   |   |   |   |   |   |   |   |   |   |   |   |   |   |   |   |   |   |   |   |   |   |   |   |   |   |   |   |   |   |   |   |   |   |   |   |   |   |   |   |   |   |   |   |   |   |   |   |   |   |   |   |   |   |   |   |   |   |   |   |   |   |   |   |   |   |   |   |   |   |   |   |   |   |   |   |   |   |   |   |   |   |   |   |   |   |   |   |   |   |   |   |   |   |   |   |   |   |   |   |   |   |   |   |   |   |   |   |   |   |   |   |   |   |   |   |   |   |   |   |   |   |   |   |   |   |   |   |   |   |   |   |   |   |   |   |   |   |   |   |   |   |   |   |   |   |   |   |   |   |   |   |   |   |   |   |   |   |   |   |   |   |   |   |   |   |   |   |   |   |   |   |   |   |   |   |   |   |   |   |   |   |   |   |   |   |   |   |   |   |   |   |   |   |   |   |   |   |   |   |   |   |   |   |   |   |   |   |   |   |   |   |   |   |   |   |   |   |   |   |   |   |   |   |   |   |   |   |   |   |   |   |   |   |   |   |   |   |   |   |   |   |   |   |   |   |   |   |   |   |   |   |   |   |   |   |   |   |   |   |   |   |   |   |   |   |   |   |   |   |   |   |   |   |   |   |   |   |   |   |   |   |   |   |   |   |   |   |   |   |   |   |   |   |   |   |   |   |   |   |   |   |   |   |   |   |   |   |   |   |   |   |   |   |   |   |   |   |   |   |   |   |   |   |   |   |   |   |   |   |   |   |   |   |   |   |   |   |   |   |   |   |   |   |   |   |   |   |   |   |   |   |   |   |   |   |   |   |   |   |   |   |   |   |   |   |   |   |   |   |   |   |   |   |   |   |   |   |   |   |   |   |   |   |   |   |   |   |   |   |   |   |   |   |   |   |   |   |   |   |   |   |   |   |   |   |   |   |   |   |   |   |   |   |   |   |   |   |   |   |   |   |   |   |   |   |   |   |   |   |   |   |   |   |   |   |   |   |   |   |   |   |   |   |   |   |   |   |   |   |   |   |   |   |   |   |   |   |   |   |   |   |   |   |   |   |   |   |   |   |   |   |   |   |   |   |   |   |   |   |   |   |   |   |
| SCPP6'PP     | T   | A   | T   | T   | C   | T   | C   | A   | T   | C   | C   | C   | T   | G   | C   | A  | A | A | A | A | A | A | A | A | A | A | A | A | A | A | A | A | A | A | A | A | A | A | A | A | A | A | A | A | A | A | A | A | A | A | A | A | A | A | A | A | A | A | A | A | A | A | A | A | A | A | A | A | A | A | A | A | A | A | A | A | A | A | A | A | A | A | A | A | A | A | A | A | A | A | A | A | A | A | A | A | A | A | A | A | A | A | A | A | A | A | A | A | A | A | A | A | A | A | A | A | A | A | A | A | A | A | A | A | A | A | A | A | A | A | A | A | A | A | A | A | A | A | A | A | A | A | A | A | A | A | A | A | A | A | A | A | A | A | A | A | A | A | A | A | A | A | A | A | A | A | A | A | A | A | A | A | A | A | A | A | A | A | A | A | A | A | A | A | A | A | A | A | A | A | A | A | A | A | A | A | A | A | A | A | A | A | A | A | A | A | A | A | A | A | A | A | A | A | A | A | A | A | A | A | A | A | A | A | A | A | A | A | A | A | A | A | A | A | A | A | A | A | A | A | A | A | A | A | A | A | A | A | A | A | A | A | A | A | A | A | A | A | A | A | A | A | A | A | A | A | A | A | A | A | A | A | A | A | A | A | A | A | A | A | A | A | A | A | A | A | A | A | A | A | A | A | A | A | A | A | A | A | A | A | A | A | A | A | A | A | A | A | A | A | A | A | A | A | A | A | A | A | A | A | A | A | A | A | A | A | A | A | A | A | A | A | A | A | A | A | A | A | A | A | A | A | A | A | A | A | A | A | A | A | A | A | A | A | A | A | A | A | A | A | A | A | A | A | A | A | A | A | A | A | A | A | A | A | A | A | A | A | A | A | A | A | A | A | A | A | A | A | A | A | A | A | A | A | A | A | A | A | A | A | A | A | A | A | A | A | A | A | A | A | A | A | A | A | A | A | A | A | A | A | A | A | A | A | A | A | A | A | A | A | A | A | A | A | A | A | A | A | A | A | A | A | A | A | A | A | A | A | A | A | A | A | A | A | A | A | A | A | A | A | A | A | A | A | A | A | A | A | A | A | A | A | A | A | A | A | A | A | A | A | A | A | A | A | A | A | A | A | A | A | A | A | A | A | A | A | A | A | A | A | A | A | A | A | A | A | A | A | A | A | A | A | A | A | A | A | A | A | A | A | A | A | A | A | A | A | A | A | A | A | A | A | A | A | A | A | A | A | A | A | A | A | A | A | A | A | A | A | A | A | A | A | A | A | A | A | A | A | A | A | A | A | A | A | A | A | A | A | A | A | A | A | A | A | A | A | A | A | A | A | A | A | A | A | A | A | A | A | A | A | A | A | A | A | A | A | A | A | A | A | A | A | A | A | A | A | A | A | A | A | A | A | A | A | A | A | A | A | A | A | A | A | A | A | A | A | A | A | A | A | A | A | A | A | A | A | A | A | A | A | A | A | A | A | A | A | A | A | A | A | A | A | A | A | A | A | A | A | A | A | A | A | A | A | A | A | A | A | A | A | A | A | A | A | A | A | A | A | A | A | A | A | A | A | A | A | A | A | A | A | A | A | A | A | A | A | A | A | A | A | A | A | A | A | A | A | A | A | A | A | A | A | A | A | A | A | A | A | A | A | A | A | A | A | A | A | A | A | A | A | A | A | A | A | A | A | A | A | A | A | A | A | A | A | A | A | A | A | A | A | A | A | A | A | A | A | A | A | A | A | A | A | A | A | A | A | A | A | A | A | A | A | A | A | A | A | A | A | A | A | A | A | A | A | A | A | A | A | A | A | A | A | A | A | A | A | A | A | A | A | A | A | A | A | A | A | A | A | A | A | A | A | A | A | A | A | A | A | A | A | A | A | A | A | A | A | A | A | A | A | A | A | A | A | A | A | A | A | A | A | A | A | A | A | A | A | A | A | A | A | A | A | A | A | A | A | A | A | A | A | A | A | A | A | A | A | A | A | A | A | A | A | A | A | A | A | A | A | A | A | A | A | A | A | A | A | A | A | A | A | A | A | A | A | A | A | A | A | A | A | A | A | A | A | A | A | A | A | A | A | A | A | A | A | A | A | A | A | A | A | A | A | A | A | A | A | A | A | A | A | A | A | A | A | A | A | A | A | A | A | A | A | A | A | A | A | A | A | A | A | A | A | A | A | A | A | A | A | A | A | A | A | A | A | A | A | A | A | A | A | A | A | A | A | A | A | A | A | A | A | A | A | A | A | A | A | A | A | A | A | A | A | A | A | A | A | A | A | A | A | A | A | A | A | A | A | A | A | A | A | A | A | A | A | A | A | A | A | A | A | A | A | A | A | A | A | A | A | A | A | A | A | A | A | A | A | A | A | A | A | A | A | A | A | A | A | A | A | A | A | A | A | A | A | A | A | A | A | A | A | A | A | A | A | A | A | A | A | A | A | A | A | A | A | A | A | A | A | A | A | A | A | A | A | A | A | A | A | A | A | A | A | A | A | A | A | A | A | A | A | A | A | A | A | A | A | A | A | A | A | A | A | A | A | A | A | A | A | A | A | A | A | A | A | A | A | A | A | A | A | A | A | A | A | A | A | A | A | A | A | A | A | A | A | A | A | A | A | A | A | A | A | A | A | A | A | A | A | A | A | A | A | A | A | A | A | A | A | A | A | A | A | A | A | A | A | A | A | A | A | A | A | A | A | A | A | A | A | A | A | A | A | A | A | A | A | A | A | A | A | A | A | A | A | A | A | A | A | A | A | A | A | A | A | A | A | A | A | A | A | A | A | A | A | A | A | A | A | A | A | A | A | A | A | A | A | A | A | A | A | A |

|              |        |        |        |        |        |        |        |        |        |        |        |        |        |        |        |        |        |        |        |        |        |        |        |        |        |        |        |        |        |        |        |        |        |        |        |        |        |        |        |        |        |        |        |        |        |        |        |        |        |        |        |        |        |        |        |        |        |        |        |        |        |        |        |        |        |        |        |        |        |        |        |        |        |        |        |        |        |        |        |        |        |        |        |        |        |        |        |        |        |        |        |        |        |        |        |        |        |        |        |        |        |        |        |        |        |        |        |        |        |        |        |        |        |        |        |        |        |        |        |        |        |        |        |        |        |        |        |        |        |        |        |        |        |        |        |        |        |        |        |        |        |        |        |        |        |        |        |        |        |        |        |        |        |        |        |        |        |        |        |        |        |        |        |        |        |        |        |        |        |        |        |        |        |        |        |        |        |        |        |        |        |        |        |        |        |        |        |        |        |        |        |        |        |        |        |        |        |        |        |        |        |        |        |        |        |        |        |        |        |        |        |        |        |        |        |        |        |        |        |        |        |        |        |        |        |        |        |        |        |        |        |        |        |        |        |        |        |        |        |        |        |        |        |        |        |        |        |        |        |        |        |        |        |        |        |        |        |        |        |        |        |        |        |        |        |        |        |        |        |        |        |        |        |        |        |        |        |        |        |        |        |        |        |        |        |        |        |        |        |        |        |        |        |        |        |        |        |        |        |        |        |        |        |        |        |        |        |        |        |        |        |        |        |        |        |        |        |        |        |        |        |        |        |        |        |        |        |        |        |        |        |        |        |        |        |        |        |        |        |        |        |        |        |        |        |        |        |        |        |        |        |        |        |        |        |        |        |        |        |        |        |        |        |        |        |        |        |        |        |        |        |        |        |        |        |        |        |        |        |        |        |        |        |        |        |        |        |        |        |        |        |        |        |        |        |        |        |        |        |        |        |        |        |        |        |        |        |        |        |        |        |        |        |        |        |        |        |        |        |        |        |        |        |        |        |        |        |        |        |        |        |        |        |        |        |        |        |        |        |        |        |        |        |        |        |        |        |        |        |        |        |        |        |        |        |        |        |        |        |        |        |        |        |        |        |        |        |        |        |        |        |        |        |        |        |        |        |        |        |        |        |        |        |        |        |        |        |        |        |        |        |        |        |        |        |        |        |        |        |        |        |        |        |        |        |        |        |        |        |        |        |        |        |        |        |        |        |        |        |        |        |        |        |        |        |        |        |        |        |        |        |        |        |        |        |        |        |        |        |        |        |        |        |        |        |        |        |        |        |        |        |        |        |        |        |        |        |        |        |        |        |        |        |        |        |        |        |        |        |        |        |        |        |        |        |        |        |        |        |        |        |        |        |        |        |        |        |        |        |        |        |        |        |        |        |        |        |        |        |        |        |        |        |        |        |        |        |        |        |        |        |        |        |        |        |        |        |        |        |        |        |        |        |        |        |        |        |        |        |        |        |        |        |        |        |        |        |        |        |        |        |        |        |        |        |        |        |        |        |        |        |        |        |        |        |        |        |        |        |        |        |        |        |        |        |        |        |        |        |        |        |        |        |        |        |        |        |        |        |        |        |        |        |        |        |        |        |        |        |        |        |        |        |        |        |        |        |        |        |        |        |        |        |        |        |        |        |        |        |        |        |        |        |        |        |        |        |        |        |        |        |        |        |        |        |        |        |        |        |        |        |        |        |        |        |        |        |        |        |        |        |        |        |        |        |        |        |        |        |        |        |        |        |        |        |        |        |        |        |        |        |        |        |        |        |        |        |        |        |        |        |        |        |        |        |        |        |        |        |        |        |        |        |        |        |        |        |        |        |        |        |        |        |        |        |        |        |        |        |        |        |        |        |        |        |        |        |        |        |        |        |        |        |        |        |        |        |        |        |        |        |        |        |        |        |        |        |        |        |        |        |        |        |        |        |        |        |        |        |        |        |        |        |        |        |        |        |        |        |        |        |        |        |        |        |        |        |        |        |        |        |        |        |        |        |        |        |        |        |        |        |        |        |        |        |        |        |        |        |        |        |        |        |        |        |        |        |        |        |        |        |        |        |        |        |        |        |        |        |        |        |        |        |        |        |        |        |        |        |        |        |        |        |        |        |        |        |        |        |        |        |        |        |        |        |        |        |        |        |        |        |        |        |        |        |        |        |        |        |        |        |        |        |        |        |        |        |        |        |        |        |        |        |        |        |        |        |        |        |        |        |        |        |        |        |        |        |        |        |        |        |        |        |        |        |        |        |        |        |        |        |        |        |        |        |        |        |        |        |        |        |        |        |        |        |        |        |        |        |        |        |        |        |        |        |        |        |        |        |        |        |        |        |        |        |        |        |        |        |        |        |        |        |        |        |        |        |        |        |        |        |        |        |        |        |        |        |        |        |        |        |        |        |        |        |        |        |        |        |        |        |        |
|--------------|--------|--------|--------|--------|--------|--------|--------|--------|--------|--------|--------|--------|--------|--------|--------|--------|--------|--------|--------|--------|--------|--------|--------|--------|--------|--------|--------|--------|--------|--------|--------|--------|--------|--------|--------|--------|--------|--------|--------|--------|--------|--------|--------|--------|--------|--------|--------|--------|--------|--------|--------|--------|--------|--------|--------|--------|--------|--------|--------|--------|--------|--------|--------|--------|--------|--------|--------|--------|--------|--------|--------|--------|--------|--------|--------|--------|--------|--------|--------|--------|--------|--------|--------|--------|--------|--------|--------|--------|--------|--------|--------|--------|--------|--------|--------|--------|--------|--------|--------|--------|--------|--------|--------|--------|--------|--------|--------|--------|--------|--------|--------|--------|--------|--------|--------|--------|--------|--------|--------|--------|--------|--------|--------|--------|--------|--------|--------|--------|--------|--------|--------|--------|--------|--------|--------|--------|--------|--------|--------|--------|--------|--------|--------|--------|--------|--------|--------|--------|--------|--------|--------|--------|--------|--------|--------|--------|--------|--------|--------|--------|--------|--------|--------|--------|--------|--------|--------|--------|--------|--------|--------|--------|--------|--------|--------|--------|--------|--------|--------|--------|--------|--------|--------|--------|--------|--------|--------|--------|--------|--------|--------|--------|--------|--------|--------|--------|--------|--------|--------|--------|--------|--------|--------|--------|--------|--------|--------|--------|--------|--------|--------|--------|--------|--------|--------|--------|--------|--------|--------|--------|--------|--------|--------|--------|--------|--------|--------|--------|--------|--------|--------|--------|--------|--------|--------|--------|--------|--------|--------|--------|--------|--------|--------|--------|--------|--------|--------|--------|--------|--------|--------|--------|--------|--------|--------|--------|--------|--------|--------|--------|--------|--------|--------|--------|--------|--------|--------|--------|--------|--------|--------|--------|--------|--------|--------|--------|--------|--------|--------|--------|--------|--------|--------|--------|--------|--------|--------|--------|--------|--------|--------|--------|--------|--------|--------|--------|--------|--------|--------|--------|--------|--------|--------|--------|--------|--------|--------|--------|--------|--------|--------|--------|--------|--------|--------|--------|--------|--------|--------|--------|--------|--------|--------|--------|--------|--------|--------|--------|--------|--------|--------|--------|--------|--------|--------|--------|--------|--------|--------|--------|--------|--------|--------|--------|--------|--------|--------|--------|--------|--------|--------|--------|--------|--------|--------|--------|--------|--------|--------|--------|--------|--------|--------|--------|--------|--------|--------|--------|--------|--------|--------|--------|--------|--------|--------|--------|--------|--------|--------|--------|--------|--------|--------|--------|--------|--------|--------|--------|--------|--------|--------|--------|--------|--------|--------|--------|--------|--------|--------|--------|--------|--------|--------|--------|--------|--------|--------|--------|--------|--------|--------|--------|--------|--------|--------|--------|--------|--------|--------|--------|--------|--------|--------|--------|--------|--------|--------|--------|--------|--------|--------|--------|--------|--------|--------|--------|--------|--------|--------|--------|--------|--------|--------|--------|--------|--------|--------|--------|--------|--------|--------|--------|--------|--------|--------|--------|--------|--------|--------|--------|--------|--------|--------|--------|--------|--------|--------|--------|--------|--------|--------|--------|--------|--------|--------|--------|--------|--------|--------|--------|--------|--------|--------|--------|--------|--------|--------|--------|--------|--------|--------|--------|--------|--------|--------|--------|--------|--------|--------|--------|--------|--------|--------|--------|--------|--------|--------|--------|--------|--------|--------|--------|--------|--------|--------|--------|--------|--------|--------|--------|--------|--------|--------|--------|--------|--------|--------|--------|--------|--------|--------|--------|--------|--------|--------|--------|--------|--------|--------|--------|--------|--------|--------|--------|--------|--------|--------|--------|--------|--------|--------|--------|--------|--------|--------|--------|--------|--------|--------|--------|--------|--------|--------|--------|--------|--------|--------|--------|--------|--------|--------|--------|--------|--------|--------|--------|--------|--------|--------|--------|--------|--------|--------|--------|--------|--------|--------|--------|--------|--------|--------|--------|--------|--------|--------|--------|--------|--------|--------|--------|--------|--------|--------|--------|--------|--------|--------|--------|--------|--------|--------|--------|--------|--------|--------|--------|--------|--------|--------|--------|--------|--------|--------|--------|--------|--------|--------|--------|--------|--------|--------|--------|--------|--------|--------|--------|--------|--------|--------|--------|--------|--------|--------|--------|--------|--------|--------|--------|--------|--------|--------|--------|--------|--------|--------|--------|--------|--------|--------|--------|--------|--------|--------|--------|--------|--------|--------|--------|--------|--------|--------|--------|--------|--------|--------|--------|--------|--------|--------|--------|--------|--------|--------|--------|--------|--------|--------|--------|--------|--------|--------|--------|--------|--------|--------|--------|--------|--------|--------|--------|--------|--------|--------|--------|--------|--------|--------|--------|--------|--------|--------|--------|--------|--------|--------|--------|--------|--------|--------|--------|--------|--------|--------|--------|--------|--------|--------|--------|--------|--------|--------|--------|--------|--------|--------|--------|--------|--------|--------|--------|--------|--------|--------|--------|--------|--------|--------|--------|--------|--------|--------|--------|--------|--------|--------|--------|--------|--------|--------|--------|--------|--------|--------|--------|--------|--------|--------|--------|--------|--------|--------|--------|--------|--------|--------|--------|--------|--------|--------|--------|--------|--------|--------|--------|--------|--------|--------|--------|--------|--------|--------|--------|--------|--------|--------|--------|--------|--------|--------|--------|--------|--------|--------|--------|--------|--------|--------|--------|--------|--------|--------|--------|--------|--------|--------|--------|--------|--------|--------|--------|--------|--------|--------|--------|--------|--------|--------|--------|--------|--------|--------|--------|--------|--------|--------|--------|--------|--------|--------|--------|--------|--------|--------|--------|--------|--------|--------|--------|--------|--------|--------|--------|--------|--------|--------|--------|--------|--------|--------|--------|--------|--------|--------|--------|--------|--------|--------|--------|--------|--------|--------|--------|--------|--------|--------|--------|--------|--------|--------|--------|--------|--------|--------|--------|--------|--------|--------|--------|--------|--------|--------|--------|--------|--------|--------|--------|--------|--------|--------|--------|--------|--------|--------|--------|--------|--------|--------|--------|--------|--------|--------|--------|--------|--------|--------|--------|--------|--------|--------|--------|--------|--------|--------|--------|--------|--------|--------|--------|--------|--------|--------|--------|--------|--------|--------|--------|--------|--------|--------|--------|--------|--------|--------|--------|--------|--------|--------|--------|--------|--------|--------|--------|--------|--------|--------|--------|--------|--------|--------|--------|--------|--------|--------|--------|--------|--------|--------|--------|--------|--------|--------|--------|--------|--------|--------|--------|--------|--------|--------|--------|--------|--------|--------|--------|--------|--------|--------|--------|--------|--------|--------|--------|--------|--------|--------|--------|--------|--------|--------|--------|--------|--------|--------|--------|--------|--------|--------|--------|--------|--------|--------|--------|--------|--------|--------|--------|--------|--------|--------|--------|--------|--------|--------|--------|--------|--------|--------|--------|--------|--------|--------|--------|--------|--------|--------|--------|--------|--------|--------|--------|--------|--------|--------|--------|--------|--------|--------|--------|--------|--------|--------|--------|
| conservation | !!!!!! | !!!!!! | !!!!!! | !!!!!! | !!!!!! | !!!!!! | !!!!!! | !!!!!! | !!!!!! | !!!!!! | !!!!!! | !!!!!! | !!!!!! | !!!!!! | !!!!!! | !!!!!! | !!!!!! | !!!!!! | !!!!!! | !!!!!! | !!!!!! | !!!!!! | !!!!!! | !!!!!! | !!!!!! | !!!!!! | !!!!!! | !!!!!! | !!!!!! | !!!!!! | !!!!!! | !!!!!! | !!!!!! | !!!!!! | !!!!!! | !!!!!! | !!!!!! | !!!!!! | !!!!!! | !!!!!! | !!!!!! | !!!!!! | !!!!!! | !!!!!! | !!!!!! | !!!!!! | !!!!!! | !!!!!! | !!!!!! | !!!!!! | !!!!!! | !!!!!! | !!!!!! | !!!!!! | !!!!!! | !!!!!! | !!!!!! | !!!!!! | !!!!!! | !!!!!! | !!!!!! | !!!!!! | !!!!!! | !!!!!! | !!!!!! | !!!!!! | !!!!!! | !!!!!! | !!!!!! | !!!!!! | !!!!!! | !!!!!! | !!!!!! | !!!!!! | !!!!!! | !!!!!! | !!!!!! | !!!!!! | !!!!!! | !!!!!! | !!!!!! | !!!!!! | !!!!!! | !!!!!! | !!!!!! | !!!!!! | !!!!!! | !!!!!! | !!!!!! | !!!!!! | !!!!!! | !!!!!! | !!!!!! | !!!!!! | !!!!!! | !!!!!! | !!!!!! | !!!!!! | !!!!!! | !!!!!! | !!!!!! | !!!!!! | !!!!!! | !!!!!! | !!!!!! | !!!!!! | !!!!!! | !!!!!! | !!!!!! | !!!!!! | !!!!!! | !!!!!! | !!!!!! | !!!!!! | !!!!!! | !!!!!! | !!!!!! | !!!!!! | !!!!!! | !!!!!! | !!!!!! | !!!!!! | !!!!!! | !!!!!! | !!!!!! | !!!!!! | !!!!!! | !!!!!! | !!!!!! | !!!!!! | !!!!!! | !!!!!! | !!!!!! | !!!!!! | !!!!!! | !!!!!! | !!!!!! | !!!!!! | !!!!!! | !!!!!! | !!!!!! | !!!!!! | !!!!!! | !!!!!! | !!!!!! | !!!!!! | !!!!!! | !!!!!! | !!!!!! | !!!!!! | !!!!!! | !!!!!! | !!!!!! | !!!!!! | !!!!!! | !!!!!! | !!!!!! | !!!!!! | !!!!!! | !!!!!! | !!!!!! | !!!!!! | !!!!!! | !!!!!! | !!!!!! | !!!!!! | !!!!!! | !!!!!! | !!!!!! | !!!!!! | !!!!!! | !!!!!! | !!!!!! | !!!!!! | !!!!!! | !!!!!! | !!!!!! | !!!!!! | !!!!!! | !!!!!! | !!!!!! | !!!!!! | !!!!!! | !!!!!! | !!!!!! | !!!!!! | !!!!!! | !!!!!! | !!!!!! | !!!!!! | !!!!!! | !!!!!! | !!!!!! | !!!!!! | !!!!!! | !!!!!! | !!!!!! | !!!!!! | !!!!!! | !!!!!! | !!!!!! | !!!!!! | !!!!!! | !!!!!! | !!!!!! | !!!!!! | !!!!!! | !!!!!! | !!!!!! | !!!!!! | !!!!!! | !!!!!! | !!!!!! | !!!!!! | !!!!!! | !!!!!! | !!!!!! | !!!!!! | !!!!!! | !!!!!! | !!!!!! | !!!!!! | !!!!!! | !!!!!! | !!!!!! | !!!!!! | !!!!!! | !!!!!! | !!!!!! | !!!!!! | !!!!!! | !!!!!! | !!!!!! | !!!!!! | !!!!!! | !!!!!! | !!!!!! | !!!!!! | !!!!!! | !!!!!! | !!!!!! | !!!!!! | !!!!!! | !!!!!! | !!!!!! | !!!!!! | !!!!!! | !!!!!! | !!!!!! | !!!!!! | !!!!!! | !!!!!! | !!!!!! | !!!!!! | !!!!!! | !!!!!! | !!!!!! | !!!!!! | !!!!!! | !!!!!! | !!!!!! | !!!!!! | !!!!!! | !!!!!! | !!!!!! | !!!!!! | !!!!!! | !!!!!! | !!!!!! | !!!!!! | !!!!!! | !!!!!! | !!!!!! | !!!!!! | !!!!!! | !!!!!! | !!!!!! | !!!!!! | !!!!!! | !!!!!! | !!!!!! | !!!!!! | !!!!!! | !!!!!! | !!!!!! | !!!!!! | !!!!!! | !!!!!! | !!!!!! | !!!!!! | !!!!!! | !!!!!! | !!!!!! | !!!!!! | !!!!!! | !!!!!! | !!!!!! | !!!!!! | !!!!!! | !!!!!! | !!!!!! | !!!!!! | !!!!!! | !!!!!! | !!!!!! | !!!!!! | !!!!!! | !!!!!! | !!!!!! | !!!!!! | !!!!!! | !!!!!! | !!!!!! | !!!!!! | !!!!!! | !!!!!! | !!!!!! | !!!!!! | !!!!!! | !!!!!! | !!!!!! | !!!!!! | !!!!!! | !!!!!! | !!!!!! | !!!!!! | !!!!!! | !!!!!! | !!!!!! | !!!!!! | !!!!!! | !!!!!! | !!!!!! | !!!!!! | !!!!!! | !!!!!! | !!!!!! | !!!!!! | !!!!!! | !!!!!! | !!!!!! | !!!!!! | !!!!!! | !!!!!! | !!!!!! | !!!!!! | !!!!!! | !!!!!! | !!!!!! | !!!!!! | !!!!!! | !!!!!! | !!!!!! | !!!!!! | !!!!!! | !!!!!! | !!!!!! | !!!!!! | !!!!!! | !!!!!! | !!!!!! | !!!!!! | !!!!!! | !!!!!! | !!!!!! | !!!!!! | !!!!!! | !!!!!! | !!!!!! | !!!!!! | !!!!!! | !!!!!! | !!!!!! | !!!!!! | !!!!!! | !!!!!! | !!!!!! | !!!!!! | !!!!!! | !!!!!! | !!!!!! | !!!!!! | !!!!!! | !!!!!! | !!!!!! | !!!!!! | !!!!!! | !!!!!! | !!!!!! | !!!!!! | !!!!!! | !!!!!! | !!!!!! | !!!!!! | !!!!!! | !!!!!! | !!!!!! | !!!!!! | !!!!!! | !!!!!! | !!!!!! | !!!!!! | !!!!!! | !!!!!! | !!!!!! | !!!!!! | !!!!!! | !!!!!! | !!!!!! | !!!!!! | !!!!!! | !!!!!! | !!!!!! | !!!!!! | !!!!!! | !!!!!! | !!!!!! | !!!!!! | !!!!!! | !!!!!! | !!!!!! | !!!!!! | !!!!!! | !!!!!! | !!!!!! | !!!!!! | !!!!!! | !!!!!! | !!!!!! | !!!!!! | !!!!!! | !!!!!! | !!!!!! | !!!!!! | !!!!!! | !!!!!! | !!!!!! | !!!!!! | !!!!!! | !!!!!! | !!!!!! | !!!!!! | !!!!!! | !!!!!! | !!!!!! | !!!!!! | !!!!!! | !!!!!! | !!!!!! | !!!!!! | !!!!!! | !!!!!! | !!!!!! | !!!!!! | !!!!!! | !!!!!! | !!!!!! | !!!!!! | !!!!!! | !!!!!! | !!!!!! | !!!!!! | !!!!!! | !!!!!! | !!!!!! | !!!!!! | !!!!!! | !!!!!! | !!!!!! | !!!!!! | !!!!!! | !!!!!! | !!!!!! | !!!!!! | !!!!!! | !!!!!! | !!!!!! | !!!!!! | !!!!!! | !!!!!! | !!!!!! | !!!!!! | !!!!!! | !!!!!! | !!!!!! | !!!!!! | !!!!!! | !!!!!! | !!!!!! | !!!!!! | !!!!!! | !!!!!! | !!!!!! | !!!!!! | !!!!!! | !!!!!! | !!!!!! | !!!!!! | !!!!!! | !!!!!! | !!!!!! | !!!!!! | !!!!!! | !!!!!! | !!!!!! | !!!!!! | !!!!!! | !!!!!! | !!!!!! | !!!!!! | !!!!!! | !!!!!! | !!!!!! | !!!!!! | !!!!!! | !!!!!! | !!!!!! | !!!!!! | !!!!!! | !!!!!! | !!!!!! | !!!!!! | !!!!!! | !!!!!! | !!!!!! | !!!!!! | !!!!!! | !!!!!! | !!!!!! | !!!!!! | !!!!!! | !!!!!! | !!!!!! | !!!!!! | !!!!!! | !!!!!! | !!!!!! | !!!!!! | !!!!!! | !!!!!! | !!!!!! | !!!!!! | !!!!!! | !!!!!! | !!!!!! | !!!!!! | !!!!!! | !!!!!! | !!!!!! | !!!!!! | !!!!!! | !!!!!! | !!!!!! | !!!!!! | !!!!!! | !!!!!! | !!!!!! | !!!!!! | !!!!!! | !!!!!! | !!!!!! | !!!!!! | !!!!!! | !!!!!! | !!!!!! | !!!!!! | !!!!!! | !!!!!! | !!!!!! | !!!!!! | !!!!!! | !!!!!! | !!!!!! | !!!!!! | !!!!!! | !!!!!! | !!!!!! | !!!!!! | !!!!!! | !!!!!! | !!!!!! | !!!!!! | !!!!!! | !!!!!! | !!!!!! | !!!!!! | !!!!!! | !!!!!! | !!!!!! | !!!!!! | !!!!!! | !!!!!! | !!!!!! | !!!!!! | !!!!!! | !!!!!! | !!!!!! | !!!!!! | !!!!!! | !!!!!! | !!!!!! | !!!!!! | !!!!!! | !!!!!! | !!!!!! | !!!!!! | !!!!!! | !!!!!! | !!!!!! | !!!!!! | !!!!!! | !!!!!! | !!!!!! | !!!!!! | !!!!!! | !!!!!! | !!!!!! | !!!!!! | !!!!!! | !!!!!! | !!!!!! | !!!!!! | !!!!!! | !!!!!! | !!!!!! | !!!!!! | !!!!!! | !!!!!! | !!!!!! | !!!!!! | !!!!!! | !!!!!! | !!!!!! | !!!!!! | !!!!!! | !!!!!! | !!!!!! | !!!!!! | !!!!!! | !!!!!! | !!!!!! | !!!!!! | !!!!!! | !!!!!! | !!!!!! | !!!!!! | !!!!!! | !!!!!! | !!!!!! | !!!!!! | !!!!!! | !!!!!! | !!!!!! | !!!!!! | !!!!!! | !!!!!! | !!!!!! | !!!!!! | !!!!!! | !!!!!! | !!!!!! | !!!!!! | !!!!!! | !!!!!! | !!!!!! | !!!!!! | !!!!!! | !!!!!! | !!!!!! | !!!!!! | !!!!!! | !!!!!! | !!!!!! | !!!!!! | !!!!!! | !!!!!! | !!!!!! | !!!!!! | !!!!!! | !!!!!! | !!!!!! | !!!!!! | !!!!!! | !!!!!! | !!!!!! | !!!!!! | !!!!!! | !!!!!! | !!!!!! | !!!!!! | !!!!!! | !!!!!! | !!!!!! | !!!!!! | !!!!!! | !!!!!! | !!!!!! | !!!!!! | !!!!!! | !!!!!! | !!!!!! | !!!!!! | !!!!!! | !!!!!! | !!!!!! | !!!!!! | !!!!!! | !!!!!! | !!!!!! | !!!!!! | !!!!!! | !!!!!! | !!!!!! | !!!!!! | !!!!!! | !!!!!! | !!!!!! | !!!!!! | !!!!!! | !!!!!! | !!!!!! | !!!!!! | !!!!!! | !!!!!! | !!!!!! | !!!!!! | !!!!!! | !!!!!! | !!!!!! | !!!!!! | !!!!!! | !!!!!! | !!!!!! | !!!!!! | !!!!!! | !!!!!! | !!!!!! | !!!!!! | !!!!!! | !!!!!! | !!!!!! | !!!!!! | !!!!!! | !!!!!! | !!!!!! | !!!!!! | !!!!!! | !!!!!! | !!!!!! | !!!!!! | !!!!!! | !!!!!! | !!!!!! | !!!!!! | !!!!!! | !!!!!! | !!!!!! | !!!!!! | !!!!!! | !!!!!! | !!!!!! | !!!!!! | !!!!!! | !!!!!! | !!!!!! | !!!!!! | !!!!!! | !!!!!! | !!!!!! | !!!!!! | !!!!!! | !!!!!! | !!!!!! | !!!!!! | !!!!!! | !!!!!! | !!!!!! | !!!!!! | !!!!!! | !!!!!! | !!!!!! | !!!!!! | !!!!!! | !!!!!! | !!!!!! | !!!!!! | !!!!!! | !!!!!! | !!!!!! | !!!!!! | !!!!!! | !!!!!! | !!!!!! | !!!!!! | !!!!!! | !!!!!! | !!!!!! | !!!!!! | !!!!!! | !!!!!! | !!!!!! | !!!!!! | !!!!!! | !!!!!! | !!!!!! | !!!!!! | !!!!!! | !!!!!! | !!!!!! | !!!!!! | !!!!!! | !!!!!! | !!!!!! | !!!!!! | !!!!!! | !!!!!! | !!!!!! | !!!!!! | !!!!!! | !!!!!! | !!!!!! | !!!!!! | !!!!!! | !!!!!! | !!!!!! | !!!!!! | !!!!!! | !!!!!! | !!!!!! | !!!!!! | !!!!!! | !!!!!! | !!!!!! | !!!!!! | !!!!!! | !!!!!! | !!!!!! | !!!!!! | !!!!!! | !!!!!! | !!!!!! | !!!!!! | !!!!!! | !!!!!! | !!!!!! | !!!!!! | !!!!!! | !!!!!! | !!!!!! | !!!!!! | !!!!!! | !!!!!! | !!!!!! | !!!!!! | !!!!!! | !!!!!! | !!!!!! | !!!!!! | !!!!!! | !!!!!! | !!!!!! | !!!!!! | !!!!!! | !!!!!! | !!!!!! | !!!!!! | !!!!!! | !!!!!! | !!!!!! | !!!!!! | !!!!!! | !!!!!! | !!!!!! | !!!!!! | !!!!!! | !!!!!! | !!!!!! | !!!!!! | !!!!!! | !!!!!! | !!!!!! | !!!!!! | !!!!!! | !!!!!! | !!!!!! | !!!!!! | !!!!!! | !!!!!! | !!!!!! | !!!!!! | !!!!!! | !!!!!! | !!!!!! | !!!!!! | !!!!!! | !!!!!! | !!!!!! | !!!!!! | !!!!!! | !!!!!! | !!!!!! | !!!!!! | !!!!!! | !!!!!! | !!!!!! | !!!!!! | !!!!!! | !!!!!! | !!!!!! | !!!!!! | !!!!!! | !!!!!! | !!!!!! | !!!!!! | !!!!!! | !!!!!! | !!!!!! | !!!!!! | !!!!!! | !!!!!! | !!!!!! | !!!!!! | !!!!!! | !!!!!! | !!!!!! | !!!!!! | !!!!!! | !!!!!! | !!!!!! | !!!!!! | !!!!!! | !!!!!! | !!!!!! | !!!!!! | !!!!!! | !!!!!! | !!!!!! | !!!!!! | !!!!!! | !!!!!! | !!!!!! | !!!!!! | !!!!!! | !!!!!! | !!!!!! | !!!!!! | !!!!!! | !!!!!! | !!!!!! | !!!!!! | !!!!!! | !!!!!! | !!!!!! | !!!!!! | !!!!!! | !!!!!! | !!!!!! | !!!!!! | !!!!!! | !!!!!! | !!!!!! | !!!!!! | !!!!!! | !!!!!! | !!!!!! | !!!!!! | !!!!!! | !!!!!! | !!!!!! | !!!!!! | !!!!!! | !!!!!! | !!!!!! | !!!!!! | !!!!!! | !!!!!! | !!!!!! | !!!!!! | !!!!!! | !!!!!! | !!!!!! | !!!!!! | !!!!!! | !!!!!! | !!!!!! | !!!!!! | !!!!!! | !!!!!! | !!!!!! | !!!!!! | !!!!!! | !!!!!! | !!!!!! | !!!!!! | !!!!!! | !!!!!! | !!!!!! | !!!!!! | !!!!!! | !!!!!! | !!!!!! | !!!!!! | !!!!!! | !!!!!! | !!!!!! | !!!!!! | !!!!!! | !!!!!! | !!!!!! | !!!!!! | !!!!!! | !!!!!! | !!!!!! | !!!!!! | !!!!!! | !!!!!! | !!!!!! | !!!!!! | !!!!!! | !!!!!! | !!!!!! | !!!!!! | !!!!!! | !!!!!! | !!!!!! | !!!!!! | !!!!!! | !!!!!! | !!!!!! | !!!!!! | !!!!!! | !!!!!! | !!!!!! | !!!!!! | !!!!!! | !!!!!! | !!!!!! | !!!!!! | !!!!!! | !!!!!! | !!!!!! | !!!!!! | !!!!!! | !!!!!! | !!!!!! | !!!!!! | !!!!!! | !!!!!! | !!!!!! | !!!!!! | !!!!!! | !!!!!! |
|--------------|--------|--------|--------|--------|--------|--------|--------|--------|--------|--------|--------|--------|--------|--------|--------|--------|--------|--------|--------|--------|--------|--------|--------|--------|--------|--------|--------|--------|--------|--------|--------|--------|--------|--------|--------|--------|--------|--------|--------|--------|--------|--------|--------|--------|--------|--------|--------|--------|--------|--------|--------|--------|--------|--------|--------|--------|--------|--------|--------|--------|--------|--------|--------|--------|--------|--------|--------|--------|--------|--------|--------|--------|--------|--------|--------|--------|--------|--------|--------|--------|--------|--------|--------|--------|--------|--------|--------|--------|--------|--------|--------|--------|--------|--------|--------|--------|--------|--------|--------|--------|--------|--------|--------|--------|--------|--------|--------|--------|--------|--------|--------|--------|--------|--------|--------|--------|--------|--------|--------|--------|--------|--------|--------|--------|--------|--------|--------|--------|--------|--------|--------|--------|--------|--------|--------|--------|--------|--------|--------|--------|--------|--------|--------|--------|--------|--------|--------|--------|--------|--------|--------|--------|--------|--------|--------|--------|--------|--------|--------|--------|--------|--------|--------|--------|--------|--------|--------|--------|--------|--------|--------|--------|--------|--------|--------|--------|--------|--------|--------|--------|--------|--------|--------|--------|--------|--------|--------|--------|--------|--------|--------|--------|--------|--------|--------|--------|--------|--------|--------|--------|--------|--------|--------|--------|--------|--------|--------|--------|--------|--------|--------|--------|--------|--------|--------|--------|--------|--------|--------|--------|--------|--------|--------|--------|--------|--------|--------|--------|--------|--------|--------|--------|--------|--------|--------|--------|--------|--------|--------|--------|--------|--------|--------|--------|--------|--------|--------|--------|--------|--------|--------|--------|--------|--------|--------|--------|--------|--------|--------|--------|--------|--------|--------|--------|--------|--------|--------|--------|--------|--------|--------|--------|--------|--------|--------|--------|--------|--------|--------|--------|--------|--------|--------|--------|--------|--------|--------|--------|--------|--------|--------|--------|--------|--------|--------|--------|--------|--------|--------|--------|--------|--------|--------|--------|--------|--------|--------|--------|--------|--------|--------|--------|--------|--------|--------|--------|--------|--------|--------|--------|--------|--------|--------|--------|--------|--------|--------|--------|--------|--------|--------|--------|--------|--------|--------|--------|--------|--------|--------|--------|--------|--------|--------|--------|--------|--------|--------|--------|--------|--------|--------|--------|--------|--------|--------|--------|--------|--------|--------|--------|--------|--------|--------|--------|--------|--------|--------|--------|--------|--------|--------|--------|--------|--------|--------|--------|--------|--------|--------|--------|--------|--------|--------|--------|--------|--------|--------|--------|--------|--------|--------|--------|--------|--------|--------|--------|--------|--------|--------|--------|--------|--------|--------|--------|--------|--------|--------|--------|--------|--------|--------|--------|--------|--------|--------|--------|--------|--------|--------|--------|--------|--------|--------|--------|--------|--------|--------|--------|--------|--------|--------|--------|--------|--------|--------|--------|--------|--------|--------|--------|--------|--------|--------|--------|--------|--------|--------|--------|--------|--------|--------|--------|--------|--------|--------|--------|--------|--------|--------|--------|--------|--------|--------|--------|--------|--------|--------|--------|--------|--------|--------|--------|--------|--------|--------|--------|--------|--------|--------|--------|--------|--------|--------|--------|--------|--------|--------|--------|--------|--------|--------|--------|--------|--------|--------|--------|--------|--------|--------|--------|--------|--------|--------|--------|--------|--------|--------|--------|--------|--------|--------|--------|--------|--------|--------|--------|--------|--------|--------|--------|--------|--------|--------|--------|--------|--------|--------|--------|--------|--------|--------|--------|--------|--------|--------|--------|--------|--------|--------|--------|--------|--------|--------|--------|--------|--------|--------|--------|--------|--------|--------|--------|--------|--------|--------|--------|--------|--------|--------|--------|--------|--------|--------|--------|--------|--------|--------|--------|--------|--------|--------|--------|--------|--------|--------|--------|--------|--------|--------|--------|--------|--------|--------|--------|--------|--------|--------|--------|--------|--------|--------|--------|--------|--------|--------|--------|--------|--------|--------|--------|--------|--------|--------|--------|--------|--------|--------|--------|--------|--------|--------|--------|--------|--------|--------|--------|--------|--------|--------|--------|--------|--------|--------|--------|--------|--------|--------|--------|--------|--------|--------|--------|--------|--------|--------|--------|--------|--------|--------|--------|--------|--------|--------|--------|--------|--------|--------|--------|--------|--------|--------|--------|--------|--------|--------|--------|--------|--------|--------|--------|--------|--------|--------|--------|--------|--------|--------|--------|--------|--------|--------|--------|--------|--------|--------|--------|--------|--------|--------|--------|--------|--------|--------|--------|--------|--------|--------|--------|--------|--------|--------|--------|--------|--------|--------|--------|--------|--------|--------|--------|--------|--------|--------|--------|--------|--------|--------|--------|--------|--------|--------|--------|--------|--------|--------|--------|--------|--------|--------|--------|--------|--------|--------|--------|--------|--------|--------|--------|--------|--------|--------|--------|--------|--------|--------|--------|--------|--------|--------|--------|--------|--------|--------|--------|--------|--------|--------|--------|--------|--------|--------|--------|--------|--------|--------|--------|--------|--------|--------|--------|--------|--------|--------|--------|--------|--------|--------|--------|--------|--------|--------|--------|--------|--------|--------|--------|--------|--------|--------|--------|--------|--------|--------|--------|--------|--------|--------|--------|--------|--------|--------|--------|--------|--------|--------|--------|--------|--------|--------|--------|--------|--------|--------|--------|--------|--------|--------|--------|--------|--------|--------|--------|--------|--------|--------|--------|--------|--------|--------|--------|--------|--------|--------|--------|--------|--------|--------|--------|--------|--------|--------|--------|--------|--------|--------|--------|--------|--------|--------|--------|--------|--------|--------|--------|--------|--------|--------|--------|--------|--------|--------|--------|--------|--------|--------|--------|--------|--------|--------|--------|--------|--------|--------|--------|--------|--------|--------|--------|--------|--------|--------|--------|--------|--------|--------|--------|--------|--------|--------|--------|--------|--------|--------|--------|--------|--------|--------|--------|--------|--------|--------|--------|--------|--------|--------|--------|--------|--------|--------|--------|--------|--------|--------|--------|--------|--------|--------|--------|--------|--------|--------|--------|--------|--------|--------|--------|--------|--------|--------|--------|--------|--------|--------|--------|--------|--------|--------|--------|--------|--------|--------|--------|--------|--------|--------|--------|--------|--------|--------|--------|--------|--------|--------|--------|--------|--------|--------|--------|--------|--------|--------|--------|--------|--------|--------|--------|--------|--------|--------|--------|--------|--------|--------|--------|--------|--------|--------|--------|--------|--------|--------|--------|--------|--------|--------|--------|--------|--------|--------|--------|--------|--------|--------|--------|--------|--------|--------|--------|--------|--------|--------|--------|--------|--------|--------|--------|--------|--------|--------|--------|--------|--------|--------|--------|--------|--------|--------|--------|--------|--------|--------|--------|--------|--------|--------|--------|--------|--------|--------|--------|--------|--------|--------|--------|--------|--------|--------|--------|--------|--------|--------|--------|--------|--------|--------|--------|--------|--------|--------|--------|--------|--------|--------|--------|--------|--------|--------|--------|--------|--------|--------|--------|

[illegible]

|              |     |     |     |   |     |     |     |     |     |     |     |     |     |     |     |   |     |
|--------------|-----|-----|-----|---|-----|-----|-----|-----|-----|-----|-----|-----|-----|-----|-----|---|-----|
| conservation | 455 | 460 | 465 |   | 470 | 475 | 480 | 485 | 490 | 495 | 500 | 505 | 510 | 515 | 520 |   |     |
|              | !   | *   | *   | * | *   | *   | *   | *   | *   | *   | *   | *   | *   | *   | *   | * |     |
| SCPP6'PP     | C   | A   | G   | G | T   | T   | C   | A   | A   | C   | A   | A   | C   | G   | A   | A | 521 |
| SCPP6' LW    | C   | A   | G   | G | T   | T   | C   | A   | A   | C   | A   | A   | C   | G   | A   | A | 506 |
| SCPP6' DR    | C   | A   | G   | T | T   | T   | C   | A   | A   | C   | C   | C   | C   | A   | T   | A | 509 |
| SCPP6' CI    | C   | A   | G   | G | T   | T   | C   | A   | A   | C   | A   | A   | C   | G   | A   | A | 503 |
| SCPP6-C1' CC | C   | A   | G   | G | T   | T   | C   | A   | A   | C   | A   | A   | C   | G   | A   | A | 242 |
| SCPP6-C2' CC | C   | A   | G   | G | T   | T   | C   | A   | A   | C   | A   | A   | C   | G   | A   | A | 480 |
| SCPP6-C1' SG | C   | A   | G   | G | T   | T   | C   | A   | A   | C   | A   | A   | C   | G   | A   | A | 512 |
| SCPP6-C2' SG | C   | A   | A   | T | C   | T   | T   | A   | A   | C   | A   | A   | C   | A   | A   | C | 420 |
| SCPP6-C1' SR | C   | A   | G   | G | T   | T   | C   | A   | A   | C   | A   | A   | C   | G   | A   | A | 524 |
| SCPP6-C2' SR | C   | A   | A   | C | C   | A   | A   | G   | T   | C   | A   | G   |     |     |     |   | 456 |
| SCPP6-C1' SA | C   | A   | G   | G | T   | T   | C   | A   | A   | C   | A   | A   | C   | G   | A   | A | 524 |
| SCPP6-C2' SA | C   | A   | A   | C | C   | A   | A   | G   | T   | C   | A   | G   |     |     |     |   | 441 |

|              |     |     |     |     |     |     |     |     |     |     |     |     |     |     |     |     |     |
|--------------|-----|-----|-----|-----|-----|-----|-----|-----|-----|-----|-----|-----|-----|-----|-----|-----|-----|
| conservation | 525 | 530 | 535 | 540 | 545 | 550 | 555 | 560 | 565 | 570 | 575 | 580 | 585 | 590 | 595 | 600 |     |
| SCPP6'PP     | *   | *   | *   | *   | *   | *   | *   | *   | *   | *   | *   | *   | *   | *   | *   | *   | 601 |
| SCPP6'PW     | G   | A   | G   | C   | T   | T   | G   | A   | G   | G   | A   | A   | C   | T   | T   | C   | 519 |
| SCPP6'DR     | G   | A   | G   | C   | T   | T   | G   | A   | G   | G   | A   | A   | C   | T   | T   | C   | 580 |
| SCPP6'CI     | G   | A   | G   | C   | T   | T   | G   | A   | G   | G   | A   | A   | C   | T   | T   | C   | 583 |
| SCPP6-C1'CC  | G   | C   | G   | C   | T   | T   | G   | A   | G   | G   | A   | A   | C   | T   | T   | C   | 322 |
| SCPP6-C2'CC  | G   | C   | G   | C   | T   | T   | G   | A   | G   | G   | A   | A   | C   | T   | T   | C   | 480 |
| SCPP6-C1'SG  | G   | C   | G   | C   | T   | T   | G   | A   | G   | G   | A   | A   | C   | T   | T   | C   | 592 |
| SCPP6-C2'SG  | G   | C   | G   | C   | T   | T   | G   | A   | G   | G   | A   | A   | C   | T   | T   | C   | 420 |
| SCPP6-C1'SR  | G   | A   | G   | C   | T   | T   | G   | A   | G   | G   | A   | A   | C   | T   | T   | C   | 604 |
| SCPP6-C2'SR  |     |     |     |     |     |     |     |     |     |     |     |     |     |     |     |     | 456 |
| SCPP6-C1'SA  | G   | C   | G   | C   | T   | T   | G   | A   | G   | G   | A   | A   | C   | T   | T   | C   | 604 |
| SCPP6-C2'SA  |     |     |     |     |     |     |     |     |     |     |     |     |     |     |     |     | 441 |

|              |     |     |     |     |     |     |     |     |     |     |     |     |     |     |     |     |     |
|--------------|-----|-----|-----|-----|-----|-----|-----|-----|-----|-----|-----|-----|-----|-----|-----|-----|-----|
| conservation | 605 | 610 | 615 | 620 | 625 | 630 | 635 | 640 | 645 | 650 | 655 | 660 | 665 | 670 | 675 | 680 |     |
| SCPP6'PP     |     |     | *   |     | *   | *   |     | *   | *   |     |     |     | *   | *   |     |     | 681 |
| SCPP6'PW     | C   | T   | G   | T   | A   | C   | T   | G   | T   | T   | A   | A   | C   | C   | T   | T   | 519 |
| SCPP6'DR     | C   | T   | G   | T   | A   | C   | T   | G   | T   | T   | A   | A   | C   | C   | T   | T   | 645 |
| SCPP6'CI     | C   | T   | G   | T   | A   | C   | T   | G   | T   | T   | A   | A   | C   | C   | T   | T   | 663 |
| SCPP6-C1'CC  | T   | A   | T   | C   | T   | T   | T   | T   | T   | T   | A   | A   | C   | C   | T   | T   | 393 |
| SCPP6-C2'CC  |     |     |     |     |     |     |     |     |     |     |     |     |     |     |     |     | 480 |
| SCPP6-C1'SG  | C   | T   | G   | T   | A   | C   | T   | G   | T   | T   | A   | A   | C   | C   | T   | T   | 666 |
| SCPP6-C2'SG  |     |     |     |     |     |     |     |     |     |     |     |     |     |     |     |     | 420 |
| SCPP6-C1'SR  | C   | T   | G   | T   | A   | C   | T   | G   | T   | T   | A   | A   | C   | C   | T   | T   | 678 |
| SCPP6-C2'SR  |     |     |     |     |     |     |     |     |     |     |     |     |     |     |     |     | 456 |
| SCPP6-C1'SA  | C   | T   | G   | T   | A   | C   | T   | G   | T   | T   | A   | A   | C   | C   | T   | T   | 678 |
| SCPP6-C2'SA  |     |     |     |     |     |     |     |     |     |     |     |     |     |     |     |     | 441 |

|              |     |     |     |     |     |     |     |     |     |     |     |     |     |     |     |     |     |
|--------------|-----|-----|-----|-----|-----|-----|-----|-----|-----|-----|-----|-----|-----|-----|-----|-----|-----|
| conservation | 685 | 690 | 695 | 700 | 705 | 710 | 715 | 720 | 725 | 730 | 735 | 740 | 745 | 750 | 755 | 760 |     |
| SCPP6'PP     |     |     | *   |     | *   | *   |     | *   | *   | *   | *   | *   | *   | *   | *   | *   | 761 |
| SCPP6'PW     | A   | C   | T   | G   | A   | A   | T   | C   | T   | G   | A   | C   | C   | A   | A   | T   | 519 |
| SCPP6'DR     | A   | C   | T   | G   | A   | A   | T   | C   | T   | G   | A   | C   | C   | A   | A   | T   | 725 |
| SCPP6'CI     | A   | A   | T   | G   | A   | A   | T   | C   | T   | G   | A   | C   | C   | A   | A   | T   | 743 |
| SCPP6-C1'CC  |     |     |     |     |     |     |     |     |     |     |     |     |     |     |     |     | 464 |
| SCPP6-C2'CC  |     |     |     |     |     |     |     |     |     |     |     |     |     |     |     |     | 480 |
| SCPP6-C1'SG  |     |     |     |     |     |     |     |     |     |     |     |     |     |     |     |     | 734 |
| SCPP6-C2'SG  |     |     |     |     |     |     |     |     |     |     |     |     |     |     |     |     | 420 |
| SCPP6-C1'SR  |     |     |     |     |     |     |     |     |     |     |     |     |     |     |     |     | 738 |
| SCPP6-C2'SR  |     |     |     |     |     |     |     |     |     |     |     |     |     |     |     |     | 456 |
| SCPP6-C1'SA  |     |     |     |     |     |     |     |     |     |     |     |     |     |     |     |     | 746 |
| SCPP6-C2'SA  |     |     |     |     |     |     |     |     |     |     |     |     |     |     |     |     | 441 |

|              |     |     |     |     |     |     |     |     |     |     |     |     |     |     |     |     |     |
|--------------|-----|-----|-----|-----|-----|-----|-----|-----|-----|-----|-----|-----|-----|-----|-----|-----|-----|
| conservation | 765 | 770 | 775 | 780 | 785 | 790 | 795 | 800 | 805 | 810 | 815 | 820 | 825 | 830 | 835 | 840 |     |
| SCPP6'PP     | *   | *   | *   | *   | *   | *   | *   | *   | *   | *   | *   | *   | *   | *   | *   | *   | 841 |
| SCPP6'PW     | T   | G   | C   | T   | A   | C   | T   | G   | T   | G   | A   | T   | C   | C   | A   | A   | 519 |
| SCPP6'DR     | T   | G   | C   | T   | A   | C   | T   | G   | T   | G   | A   | T   | C   | C   | A   | A   | 805 |
| SCPP6'CI     | T   | G   | C   | T   | A   | C   | T   | G   | T   | G   | A   | T   | C   | C   | A   | A   | 823 |
| SCPP6-C1'CC  | T   | G   | T   | G   | A   | T   | C   | C   | A   | A   | T   | A   | A   | T   | A   | T   | 544 |
| SCPP6-C2'CC  |     |     |     |     |     |     |     |     |     |     |     |     |     |     |     |     | 480 |
| SCPP6-C1'SG  | T   | G   | C   | T   | A   | C   | T   | G   | T   | G   | A   | T   | C   | C   | A   | A   | 814 |
| SCPP6-C2'SG  |     |     |     |     |     |     |     |     |     |     |     |     |     |     |     |     | 420 |
| SCPP6-C1'SR  |     |     |     |     |     |     |     |     |     |     |     |     |     |     |     |     | 814 |
| SCPP6-C2'SR  |     |     |     |     |     |     |     |     |     |     |     |     |     |     |     |     | 456 |
| SCPP6-C1'SA  | T   | G   | C   | T   | A   | C   | T   | G   | T   | G   | A   | T   | C   | C   | A   | A   | 817 |
| SCPP6-C2'SA  |     |     |     |     |     |     |     |     |     |     |     |     |     |     |     |     | 441 |

|              |    |     |
|--------------|----|-----|
| conservation |    |     |
| SCPP6'PP     | GT | 843 |
| SCPP6'PW     | .. | 519 |
| SCPP6'DR     | GT | 807 |
| SCPP6'CI     | GT | 825 |
| SCPP6-C1'CC  | GT | 546 |
| SCPP6-C2'CC  | .. | 480 |
| SCPP6-C1'SG  | GT | 816 |
| SCPP6-C2'SG  | .. | 420 |
| SCPP6-C1'SR  | TG | 816 |
| SCPP6-C2'SR  | .. | 456 |
| SCPP6-C1'SA  | GT | 819 |
| SCPP6-C2'SA  | .. | 441 |

- ☐ non conserved
- ☒ ≥ 55% conserved
- ☒ ≥ 85% conserved
